# Supplementary material for: Trends in metabolite discovery from Actinomycetes
Source: Royal Society of Chemistry journal article supplement (doi:10.1039/d4np00075g), 2025-01-01
Supplement: d4np00075g1.xlsx [file d4np00075g1.xlsx]

## Sheet: NPA_entries_2013-2023
Compound name	Reference DOI	Year	npaid	Originality	Approach	NP Classifier Pathway Results	BGC selection strategy
Abyssomicin J	10.1002/anie.201208801	2013	NPA006128	Variant	Bioassay	Polyketides	N/A
Abyssomicin K	10.1002/anie.201208801	2013	NPA010861	Variant	Bioassay	Polyketides	N/A
Abyssomicin L	10.1002/anie.201208801	2013	NPA017650	Variant	Bioassay	Polyketides	N/A
Anthracimycin	10.1002/anie.201302749	2013	NPA000874	Original	Bioassay	Polyketides	N/A
Nocardiopyrone B	10.1002/cbdv.201200086	2013	NPA005422	Original	Bioassay	Polyketides	N/A
Miaolienone	10.1002/cbdv.201200242	2013	NPA012490	Original	Bioassay	Polyketides	N/A
Miaolinolide	10.1002/cbdv.201200242	2013	NPA004290	Variant	Bioassay	Polyketides	N/A
Napyradiomycin 3	10.1002/ejoc.201300349	2013	NPA001863	Variant	Bioassay	Polyketides	N/A
Napyradiomycin 1	10.1002/ejoc.201300349	2013	NPA003141	Variant	Bioassay	Polyketides	N/A
Napyradiomycin 2	10.1002/ejoc.201300349	2013	NPA005009	Variant	Bioassay	Polyketides	N/A
Napyradiomycin C	10.1002/ejoc.201300349	2013	NPA007062	Variant	Bioassay	Polyketides	N/A
Napyradiomycin B	10.1002/ejoc.201300349	2013	NPA008979	Variant	Bioassay	Polyketides	N/A
Napyradiomycin F	10.1002/ejoc.201300349	2013	NPA009101	Variant	Bioassay	Polyketides, Terpenoids	N/A
Napyradiomycin D	10.1002/ejoc.201300349	2013	NPA011390	Variant	Bioassay	Polyketides	N/A
Napyradiomycin E	10.1002/ejoc.201300349	2013	NPA016806	Variant	Bioassay	Polyketides, Terpenoids	N/A
Napyradiomycin A	10.1002/ejoc.201300349	2013	NPA016983	Variant	Bioassay	Polyketides	N/A
Nocapyrone J	10.1016/j.chembiol.2012.10.019	2013	NPA015222	Original	Bioassay	Polyketides	N/A
Nocapyrone P	10.1016/j.chembiol.2012.10.019	2013	NPA017994	Variant	Bioassay	Polyketides	N/A
Nocapyrone Q	10.1016/j.chembiol.2012.10.019	2013	NPA005231	Variant	Bioassay	Polyketides	N/A
Nocapyrone O	10.1016/j.chembiol.2012.10.019	2013	NPA006216	Variant	Bioassay	Polyketides	N/A
Nocapyrone K	10.1016/j.chembiol.2012.10.019	2013	NPA006551	Variant	Bioassay	Polyketides	N/A
Nocapyrone L	10.1016/j.chembiol.2012.10.019	2013	NPA017916	Variant	Bioassay	Polyketides	N/A
(1β,4α,5β,6α,7β,10β)-1,6,11-Eudesmanetriol	10.1016/j.phytol.2012.11.009	2013	NPA031303	Variant	Bioassay	Terpenoids	N/A
11,12,13-Trinor-1,3,5,8-eudesmanetetrol	10.1016/j.phytol.2012.11.009	2013	NPA031304	Variant	Bioassay	Terpenoids	N/A
Novclobiocin 101	10.1016/j.tet.2013.07.034	2013	NPA006712	Variant	Bioassay	Shikimates and Phenylpropanoids	N/A
4-hydroxy-3-(3-methylbut-2-enyl)benzamide	10.1016/j.tet.2013.07.034	2013	NPA010470	Variant	Bioassay	Alkaloids	N/A
Samroiyotmycin B	10.1016/j.tet.2013.07.034	2013	NPA019356	Variant	Bioassay	Polyketides	N/A
Samroiyotmycin A	10.1016/j.tet.2013.07.034	2013	NPA019530	Variant	Bioassay	Polyketides	N/A
Rubimycinone A	10.1016/j.tetlet.2012.11.130	2013	NPA011589	Variant	Bioassay	Polyketides	N/A
Saccharonol B	10.1016/j.tetlet.2013.09.060	2013	NPA012150	Variant	Bioassay	Shikimates and Phenylpropanoids	N/A
Surugamide D	10.1021/jo400708u	2013	NPA004501	Variant	Bioassay	Amino acids and Peptides	N/A
Surugamide A	10.1021/jo400708u	2013	NPA005450	Variant	Bioassay	Amino acids and Peptides	N/A
Surugamide B	10.1021/jo400708u	2013	NPA008101	Variant	Bioassay	Amino acids and Peptides	N/A
Surugamide C	10.1021/jo400708u	2013	NPA011659	Variant	Bioassay	Amino acids and Peptides	N/A
Surugamide E	10.1021/jo400708u	2013	NPA012867	Variant	Bioassay	Amino acids and Peptides	N/A
Vegfrecine	10.1021/np300535c	2013	NPA016934	Original	Bioassay	Polyketides	N/A
Sacchathridine A	10.1021/np3006327	2013	NPA015419	Original	Bioassay	Polyketides	N/A
Pronqodine A	10.1021/np300643f	2013	NPA011490	Variant	Bioassay	Polyketides	N/A
Solphenazine E	10.1021/np3007606	2013	NPA002159	Variant	Bioassay	Alkaloids	N/A
Solphenazine D	10.1021/np3007606	2013	NPA007215	Variant	Bioassay	Alkaloids	N/A
Solphenazine A	10.1021/np3007606	2013	NPA007767	Variant	Bioassay	Alkaloids	N/A
4-methylaminobenzoyl rhamnopyranoside	10.1021/np3007606	2013	NPA008183	Variant	Bioassay		N/A
Solphenazine C	10.1021/np3007606	2013	NPA013825	Variant	Bioassay	Alkaloids	N/A
Solphenazine F	10.1021/np3007606	2013	NPA016641	Variant	Bioassay	Alkaloids	N/A
Solphenazine B	10.1021/np3007606	2013	NPA018574	Variant	Bioassay	Alkaloids	N/A
(1S,8R,11S,18R,21S,24R)-10,11-dimethyl-21-(2-methylpropyl)-24-[(S)-1-methylpropyl]-3,4,10,13,14,20,23,26,27-nonaazatetracyclo[24.4.0.03,8.013,18]triacontane-2,9,12,19,22,25-hexaone	10.1021/np400145u	2013	NPA002056	Variant	Bioassay	Amino acids and Peptides, Polyketides	N/A
(1S,8R,11S,18R,21S,24R)-10,11-dimethyl-21-(2-methylpropyl)-24-(propan-2-yl)-3,4,10,13,14,20,23,26,27-nonaazatetracyclo[24.4.0.03,8.013,18]triacontane-2,9,12,19,22,25-hexaone	10.1021/np400145u	2013	NPA014278	Variant	Bioassay	Amino acids and Peptides, Polyketides	N/A
Phoslactomycin H	10.1021/np400232j	2013	NPA009296	Original	Bioassay	Polyketides	N/A
Phoslactomycin I	10.1021/np400232j	2013	NPA015773	Variant	Bioassay	Polyketides	N/A
Violapyrone B	10.1021/np4003417	2013	NPA002792	Variant	Bioassay	Polyketides	N/A
Violapyrone D	10.1021/np4003417	2013	NPA014881	Variant	Bioassay	Polyketides	N/A
Violapyrone A	10.1021/np4003417	2013	NPA014895	Variant	Bioassay	Polyketides	N/A
Violapyrone F	10.1021/np4003417	2013	NPA015424	Variant	Bioassay	Polyketides	N/A
Violapyrone C	10.1021/np4003417	2013	NPA018313	Variant	Bioassay	Polyketides	N/A
Violapyrone E	10.1021/np4003417	2013	NPA018569	Variant	Bioassay	Polyketides	N/A
Violapyrone G	10.1021/np4003417	2013	NPA019675	Variant	Bioassay	Polyketides	N/A
Marfuraquinocin A	10.1021/np4006025	2013	NPA004101	Original	Bioassay	Polyketides	N/A
Marfuraquinocin B	10.1021/np4006025	2013	NPA014885	Variant	Bioassay	Polyketides	N/A
Marfuraquinocin C	10.1021/np4006025	2013	NPA002343	Variant	Bioassay	Polyketides	N/A
Phenaziterpene B	10.1021/np4006025	2013	NPA007145	Variant	Bioassay	Alkaloids	N/A
Marfuraquinocin D	10.1021/np4006025	2013	NPA013712	Variant	Bioassay	Polyketides	N/A
Phenaziterpene A	10.1021/np4006025	2013	NPA015380	Variant	Bioassay	Alkaloids	N/A
Nahuoic acid A	10.1021/ol303416k	2013	NPA013788	Original	Bioassay	Polyketides	N/A
Nivetetracyclate A	10.1021/ol4027733	2013	NPA017059	Original	Bioassay	Polyketides	N/A
Nivetetracyclate B	10.1021/ol4027733	2013	NPA006012	Variant	Bioassay	Polyketides	N/A
Migracin B	10.1038/ja.2012.112	2013	NPA005386	Variant	Bioassay	Polyketides	N/A
Migracin A	10.1038/ja.2012.112	2013	NPA015676	Variant	Bioassay	Polyketides	N/A
Nocazine D/E	10.1038/ja.2012.88	2013	NPA005619	Variant	Bioassay	Alkaloids, Amino acids and Peptides	N/A
Saccharosporone B	10.1038/ja.2013.16	2013	NPA003631	Variant	Bioassay	Polyketides	N/A
Saccharosporone C	10.1038/ja.2013.16	2013	NPA010911	Variant	Bioassay	Polyketides	N/A
Saccharosporone A	10.1038/ja.2013.16	2013	NPA013444	Variant	Bioassay	Polyketides	N/A
Waldiomycin	10.1038/ja.2013.33	2013	NPA014316	Variant	Bioassay	Polyketides	N/A
Intervenolin	10.1038/ja.2013.42	2013	NPA011345	Variant	Bioassay	Alkaloids	N/A
N-trans-cinnamoyl 2-amino-3a,4,5,6,7,8,9,10,11,12,13,13a-dodecahydrocyclododeca[d]oxazole	10.1080/14786419.2012.682997	2013	NPA000391	Original	Bioassay	Alkaloids	N/A
Iso-16-deethylindanomycin	10.1080/14786419.2013.793688	2013	NPA004333	Variant	Bioassay	Polyketides	N/A
16-deethylindanomycin methyl ester	10.1080/14786419.2013.793688	2013	NPA004754	Variant	Bioassay	Polyketides	N/A
Iso-16-deethylindanomycin methyl ester	10.1080/14786419.2013.793688	2013	NPA013352	Variant	Bioassay	Polyketides	N/A
Nocapyrone H	10.1248/cpb.c12-00956	2013	NPA007800	Original	Bioassay	Polyketides	N/A
Nocapyrone I	10.1248/cpb.c12-00956	2013	NPA005087	Variant	Bioassay	Polyketides	N/A
Desmethyl-5-hydroxynovobiocin	10.1371/journal.pone.0077078	2013	NPA031433	Variant	Bioassay	Shikimates and Phenylpropanoids	N/A
5-Hydroxynovobiocin	10.1371/journal.pone.0077078	2013	NPA031434	Variant	Bioassay	Shikimates and Phenylpropanoids	N/A
Desmethyldescarbamoyl-5-hydroxynovobiocin	10.1371/journal.pone.0077078	2013	NPA031435	Variant	Bioassay	Shikimates and Phenylpropanoids	N/A
Desmethylnovobiocin	10.1371/journal.pone.0077078	2013	NPA031436	Variant	Bioassay	Shikimates and Phenylpropanoids	N/A
Desmethyldescarbamoylnovobiocin	10.1371/journal.pone.0077078	2013	NPA031437	Variant	Bioassay	Shikimates and Phenylpropanoids	N/A
2-hydroxy-5-((6-hydroxy-4-oxo-4H-pyran-2-yl)methyl)-2-propylchroman-4-one	10.3390/md11010124	2013	NPA004798	Variant	Bioassay	Polyketides	N/A
Kocurin	10.3390/md11020387	2013	NPA012970	Variant	Bioassay	Amino acids and Peptides	N/A
(3Z,6Z)-3-((1H-imidazol-5-yl)methylene)-6-isobutylidenepiperazine-2,5-dione	10.3390/md11041035	2013	NPA005170	Original	Bioassay	Alkaloids	N/A
(3Z,6E)-1-N-methyl-3-benzylidene-6-(2R-methyl-3-hydroxypropylidene)piperazine-2,5-dione	10.3390/md11041035	2013	NPA000931	Variant	Bioassay	Alkaloids	N/A
(3Z,6Z)-3-(4-hydroxybenzylidene)-6-isobutylidenepiperazine-2,5-dione	10.3390/md11041035	2013	NPA010043	Variant	Bioassay	Alkaloids, Amino acids and Peptides	N/A
(3Z,6E)-1-N-methyl-3-benzylidene-6-(2S-methyl-3-hydroxypropylidene)piperazine-2,5-dione	10.3390/md11041035	2013	NPA012492	Variant	Bioassay	Alkaloids	N/A
(3Z,6S)-3-benzylidene-6-(2S-but-2-yl)piperazine-2,5-dione	10.3390/md11041035	2013	NPA015566	Variant	Bioassay	Alkaloids, Amino acids and Peptides	N/A
Juvenimicin C	10.3390/md11041152	2013	NPA008762	Variant	Bioassay	Polyketides	N/A
5-O-α-L-rhamnosyltylactone	10.3390/md11041152	2013	NPA014623	Variant	Bioassay	Polyketides	N/A
Lobophorin H	10.3390/md11103891	2013	NPA014755	Variant	Bioassay	Polyketides	N/A
Z-4-2	10.3390/molecules18032763	2013	NPA000045	Original	Bioassay		N/A
(2E,4Z,6E,8Z)-5,9-dimethyl-10-oxododeca-2,4,6,8-tetraenoic acid	10.1007/s10600-014-0970-4	2014	NPA013347	Original	Bioassay	Terpenoids	N/A
Acrocarpunilactone	10.1007/s10600-014-1034-5	2014	NPA008815	Variant	Bioassay	Fatty acids	N/A
Microluside A	10.1016/j.bmcl.2014.09.040	2014	NPA004085	Original	Bioassay	Shikimates and Phenylpropanoids	N/A
Nitrosporeunol F	10.1016/j.bmcl.2014.09.049	2014	NPA015751	Original	Bioassay	Terpenoids	N/A
Nitrosporeunol B	10.1016/j.bmcl.2014.09.049	2014	NPA016977	Original	Bioassay	Polyketides	N/A
Nitrosporeunol G	10.1016/j.bmcl.2014.09.049	2014	NPA003949	Variant	Bioassay	Polyketides, Terpenoids	N/A
Nitrosporeunol E	10.1016/j.bmcl.2014.09.049	2014	NPA006388	Variant	Bioassay	Terpenoids	N/A
Nitrosporeunol D	10.1016/j.bmcl.2014.09.049	2014	NPA010035	Variant	Bioassay	Polyketides	N/A
Nitrosporeunol A	10.1016/j.bmcl.2014.09.049	2014	NPA010082	Variant	Bioassay	Shikimates and Phenylpropanoids	N/A
Nitrosporeunol C	10.1016/j.bmcl.2014.09.049	2014	NPA015119	Variant	Bioassay	Polyketides	N/A
Lassomycin	10.1016/j.chembiol.2014.01.014	2014	NPA001002	Variant	Bioassay	Amino acids and Peptides	N/A
Streptophenazine J	10.1016/j.phytol.2014.08.011	2014	NPA001526	Variant	Bioassay	Alkaloids	N/A
Streptophenazine K	10.1016/j.phytol.2014.08.011	2014	NPA007856	Variant	Bioassay	Alkaloids	N/A
Streptophenazine L	10.1016/j.phytol.2014.08.011	2014	NPA019933	Variant	Bioassay	Alkaloids	N/A
Marformycin E	10.1016/j.tet.2014.02.007	2014	NPA001180	Variant	Bioassay	Amino acids and Peptides, Polyketides	N/A
Marformycin C	10.1016/j.tet.2014.02.007	2014	NPA013011	Variant	Bioassay	Amino acids and Peptides, Polyketides	N/A
Marformycin F	10.1016/j.tet.2014.02.007	2014	NPA013157	Variant	Bioassay	Amino acids and Peptides, Polyketides	N/A
Marformycin A	10.1016/j.tet.2014.02.007	2014	NPA013954	Variant	Bioassay	Amino acids and Peptides, Polyketides	N/A
Marformycin B	10.1016/j.tet.2014.02.007	2014	NPA014097	Variant	Bioassay	Amino acids and Peptides, Polyketides	N/A
Marformycin D	10.1016/j.tet.2014.02.007	2014	NPA017989	Variant	Bioassay	Amino acids and Peptides, Polyketides	N/A
Baulamycin A	10.1021/ja4115924	2014	NPA006875	Original	Bioassay	Polyketides	N/A
Baulamycin B	10.1021/ja4115924	2014	NPA016659	Variant	Bioassay	Polyketides	N/A
8-deoxyheronamide C	10.1021/ja500128u	2014	NPA006567	Variant	Bioassay	Amino acids and Peptides, Polyketides	N/A
Not named	10.1021/np400360h	2014	NPA015059	Original	Bioassay	Amino acids and Peptides	N/A
2-(1,1-diallylbut-3-enyl)-5-nonylphenol	10.1021/np400360h	2014	NPA015188	Original	Bioassay	Polyketides	N/A
2'-O-demethylherbicidin F	10.1021/np4006635	2014	NPA004772	Variant	Bioassay	Carbohydrates	N/A
9'-deoxy-8',8'-dihydroxyherbicidin B	10.1021/np4006635	2014	NPA009394	Variant	Bioassay	Carbohydrates	N/A
9'-deoxy-8'-oxoherbicidin B	10.1021/np4006635	2014	NPA011487	Variant	Bioassay	Carbohydrates	N/A
8'-epi-herbicidin B	10.1021/np4006635	2014	NPA013561	Variant	Bioassay	Carbohydrates	N/A
Dretamycin	10.1021/np401019t	2014	NPA010106	Original	Bioassay	Amino acids and Peptides	N/A
Griseorhodin E	10.1021/np500155d	2014	NPA004012	Original	Bioassay	Shikimates and Phenylpropanoids	N/A
Griseorhodin F	10.1021/np500155d	2014	NPA013514	Variant	Bioassay	Shikimates and Phenylpropanoids	N/A
Griseorhodin D1/D2	10.1021/np500155d	2014	NPA006377	Variant	Bioassay	Polyketides	N/A
Carpatamide A	10.1021/np500207p	2014	NPA001126	Variant	Bioassay	Alkaloids, Shikimates and Phenylpropanoids	N/A
Carpatamide B	10.1021/np500207p	2014	NPA009466	Variant	Bioassay	Alkaloids, Shikimates and Phenylpropanoids	N/A
Carpatamide C	10.1021/np500207p	2014	NPA010045	Variant	Bioassay	Alkaloids	N/A
Ahpatinin Ac	10.1021/np500337m	2014	NPA012539	Variant	Bioassay	Amino acids and Peptides	N/A
Ahpatinin Pr	10.1021/np500337m	2014	NPA018009	Variant	Bioassay	Amino acids and Peptides	N/A
Desotamide C	10.1021/np500399v	2014	NPA017022	Variant	Bioassay	Amino acids and Peptides	N/A
Desotamide B	10.1021/np500399v	2014	NPA017589	Variant	Bioassay	Amino acids and Peptides	N/A
Desotamide D	10.1021/np500399v	2014	NPA018393	Variant	Bioassay	Amino acids and Peptides	N/A
Cyanogramide	10.1021/ol501523d	2014	NPA006265	Original	Bioassay	Alkaloids, Amino acids and Peptides	N/A
Ecumicin	10.1021/ol5026603	2014	NPA004733	Variant	Bioassay	Amino acids and Peptides, Polyketides	N/A
Chlorocatechelin A	10.1021/ol502964s	2014	NPA006296	Original	Bioassay	Amino acids and Peptides	N/A
Chlorocatechelin B	10.1021/ol502964s	2014	NPA003930	Variant	Bioassay	Amino acids and Peptides	N/A
Lobophorin I	10.1038/ja.2013.115	2014	NPA004862	Variant	Bioassay	Polyketides	N/A
Lobophorin H	10.1038/ja.2013.115	2014	NPA032455	Variant	Bioassay	Polyketides	N/A
5-prenyltryptophol	10.1038/ja.2014.44	2014	NPA031359	Variant	Bioassay	Alkaloids	N/A
Habiterpenol	10.1038/ja.2014.71	2014	NPA018817	Variant	Bioassay	Terpenoids	N/A
Actinopyrone D	10.1038/ja.2014.76	2014	NPA019468	Variant	Bioassay	Polyketides	N/A
(±)-hemi-oxanthromicin B	10.1039/c4ob00745j	2014	NPA000243	Variant	Bioassay	Polyketides	N/A
(±)-hemi-oxanthromicin A	10.1039/c4ob00745j	2014	NPA000427	Variant	Bioassay	Polyketides	N/A
(+)-oxanthromicin	10.1039/c4ob00745j	2014	NPA003662	Variant	Bioassay	Polyketides	N/A
(±)-spiro-oxanthromicin A	10.1039/c4ob00745j	2014	NPA013856	Variant	Bioassay	Polyketides	N/A
Oxanthroquinone	10.1039/c4ob00745j	2014	NPA019641	Variant	Bioassay	Polyketides	N/A
Natalamycin A	10.1039/C4SC01136H	2014	NPA029006	Original	Bioassay	Polyketides	N/A
Axinelline A	10.1080/14786419.2014.891204	2014	NPA017693	Variant	Bioassay		N/A
Mer-A 2026B	10.1128/AAC.02025-13	2014	NPA031498	Variant	Bioassay	Polyketides	N/A
1,4,6-trihydroxy-8-pentyl-9,10-anthraquinone	10.1248/cpb.c13-00693	2014	NPA000368	Variant	Bioassay	Polyketides	N/A
1,4,6-trihydroxy-8-propyl-9,10-anthraquinone	10.1248/cpb.c13-00693	2014	NPA004458	Variant	Bioassay	Polyketides	N/A
1,4,6-trihydroxy-8-isopentyl-9,10-anthraquinone	10.1248/cpb.c13-00693	2014	NPA009046	Variant	Bioassay	Polyketides	N/A
1,4,6-trihydroxy-8-butyl-9,10-anthraquinone	10.1248/cpb.c13-00693	2014	NPA012349	Variant	Bioassay	Polyketides	N/A
Hyaluromycin	10.3390/md12010491	2014	NPA001696	Variant	Bioassay	Polyketides	N/A
Not named	10.3390/md12052913	2014	NPA005511	Variant	Bioassay	Polyketides	N/A
Diazaquinomycin G	10.3390/md12063574	2014	NPA008191	Variant	Bioassay	Alkaloids	N/A
Diazaquinomycin E	10.3390/md12063574	2014	NPA016362	Variant	Bioassay	Alkaloids	N/A
Diazaquinomycin F	10.3390/md12063574	2014	NPA017871	Variant	Bioassay	Alkaloids	N/A
Streptcytosine E	10.3390/md12126102	2014	NPA012031	Variant	Bioassay	Carbohydrates	N/A
Streptcytosine B	10.3390/md12126102	2014	NPA012760	Variant	Bioassay	Carbohydrates	N/A
Streptcytosine D	10.3390/md12126102	2014	NPA013304	Variant	Bioassay	Carbohydrates	N/A
Streptcytosine C	10.3390/md12126102	2014	NPA015311	Variant	Bioassay	Carbohydrates	N/A
Streptcytosine A	10.3390/md12126102	2014	NPA016085	Variant	Bioassay	Carbohydrates	N/A
(S)-2-(2-hydroxyphenyl)-4-hydroxymethyl-4,5-dihydrooxazole	10.3987/com-14-13001	2014	NPA007598	Variant	Bioassay		N/A
Iso-naseseazine B	10.1007/s00203-014-1059-y	2015	NPA029880	Variant	Bioassay	Amino acids and Peptides	N/A
N-isopentyltridecanamide	10.1007/s00284-015-0780-3	2015	NPA029881	Variant	Bioassay	Fatty acids	N/A
Xestostreptin	10.1016/j.bmcl.2015.07.103	2015	NPA012601	Original	Bioassay	Alkaloids, Amino acids and Peptides	N/A
Butyl homononactate	10.1016/j.phytol.2015.04.001	2015	NPA029902	Variant	Bioassay	Polyketides	N/A
Butyl nonactate	10.1016/j.phytol.2015.04.001	2015	NPA029903	Variant	Bioassay	Polyketides	N/A
8-acetyl homononactic acid	10.1016/j.phytol.2015.04.001	2015	NPA029904	Variant	Bioassay		N/A
Steffimycin C	10.1016/j.tetlet.2015.10.098	2015	NPA003585	Variant	Bioassay	Polyketides	N/A
1,8-dihydroxy-2-(1-hydroxyethyl)-6-methoxy-3-methylanthraquinone	10.1016/j.tetlet.2015.10.098	2015	NPA014504	Variant	Bioassay	Polyketides	N/A
Nocarbenzoxazole F	10.1021/acs.jnatprod.5b00031	2015	NPA000895	Variant	Bioassay		N/A
Nocarbenzoxazole D	10.1021/acs.jnatprod.5b00031	2015	NPA009105	Variant	Bioassay	Alkaloids	N/A
Nocarbenzoxazole G	10.1021/acs.jnatprod.5b00031	2015	NPA009989	Variant	Bioassay	Alkaloids	N/A
Nocarbenzoxazole E	10.1021/acs.jnatprod.5b00031	2015	NPA011065	Variant	Bioassay	Alkaloids	N/A
Nocarbenzoxazole C	10.1021/acs.jnatprod.5b00031	2015	NPA013848	Variant	Bioassay	Alkaloids	N/A
Nocarbenzoxazole B	10.1021/acs.jnatprod.5b00031	2015	NPA017455	Variant	Bioassay	Alkaloids	N/A
Nocarbenzoxazole A	10.1021/acs.jnatprod.5b00031	2015	NPA017545	Variant	Bioassay	Alkaloids	N/A
Aranciamycin I	10.1021/acs.jnatprod.5b00095	2015	NPA005670	Variant	Bioassay	Polyketides	N/A
Aranciamycin J	10.1021/acs.jnatprod.5b00095	2015	NPA019046	Variant	Bioassay	Polyketides	N/A
Actinoramide F	10.1021/acs.jnatprod.5b00489	2015	NPA001299	Variant	Bioassay	Amino acids and Peptides	N/A
Actinoramide D	10.1021/acs.jnatprod.5b00489	2015	NPA006386	Variant	Bioassay	Amino acids and Peptides	N/A
Actinoramide E	10.1021/acs.jnatprod.5b00489	2015	NPA012521	Variant	Bioassay	Amino acids and Peptides	N/A
25-epi-actinoramide A	10.1021/acs.jnatprod.5b00489	2015	NPA028966	Variant	Bioassay	Amino acids and Peptides	N/A
2,2'-dimethyl-11,11′-O-dimethylelaiophylin	10.1021/acs.jnatprod.5b00752	2015	NPA003290	Variant	Bioassay	Polyketides	N/A
2,2'-dimethylelaiophylin	10.1021/acs.jnatprod.5b00752	2015	NPA007564	Variant	Bioassay	Polyketides	N/A
2-methylelaiophylin	10.1021/acs.jnatprod.5b00752	2015	NPA014517	Variant	Bioassay	Polyketides	N/A
2-methyl-11,11′-O-dimethylelaiophylin	10.1021/acs.jnatprod.5b00752	2015	NPA018202	Variant	Bioassay	Polyketides	N/A
Microbacterin A	10.1021/acs.orglett.5b00172	2015	NPA020217	Variant	Bioassay	Amino acids and Peptides	N/A
Microbacterin B	10.1021/acs.orglett.5b00172	2015	NPA020218	Variant	Bioassay	Amino acids and Peptides	N/A
Diazaquinomycin H	10.1021/acsinfecdis.5b00005	2015	NPA002559	Original	Bioassay	Alkaloids	N/A
Diazaquinomycin J	10.1021/acsinfecdis.5b00005	2015	NPA012751	Variant	Bioassay	Alkaloids	N/A
Lobophorin CR1	10.1021/acsmedchemlett.5b00127	2015	NPA029924	Variant	Bioassay	Polyketides	N/A
Lobophorin CR2	10.1021/acsmedchemlett.5b00127	2015	NPA029925	Variant	Bioassay	Polyketides	N/A
Lobophorin CR3	10.1021/acsmedchemlett.5b00127	2015	NPA029926	Variant	Bioassay	Polyketides	N/A
Salinipostin A	10.1021/jo5024409	2015	NPA000195	Variant	Bioassay	Fatty acids	N/A
Salinipostin D	10.1021/jo5024409	2015	NPA001150	Variant	Bioassay	Fatty acids	N/A
Salinipostin G	10.1021/jo5024409	2015	NPA002161	Variant	Bioassay	Fatty acids	N/A
Salinipostin C	10.1021/jo5024409	2015	NPA005910	Variant	Bioassay	Fatty acids	N/A
Salinipostin I	10.1021/jo5024409	2015	NPA008358	Variant	Bioassay	Fatty acids	N/A
Salinipostin J	10.1021/jo5024409	2015	NPA008390	Variant	Bioassay	Fatty acids	N/A
Salinipostin H	10.1021/jo5024409	2015	NPA008595	Variant	Bioassay	Fatty acids	N/A
Salinipostin K	10.1021/jo5024409	2015	NPA009946	Variant	Bioassay	Fatty acids	N/A
Salinipostin B	10.1021/jo5024409	2015	NPA010069	Variant	Bioassay	Fatty acids	N/A
Salinipostin F	10.1021/jo5024409	2015	NPA012311	Variant	Bioassay	Fatty acids	N/A
Salinipostin E	10.1021/jo5024409	2015	NPA014774	Variant	Bioassay	Fatty acids	N/A
Inubosin C	10.1021/np5006218	2015	NPA002203	Variant	Bioassay	Alkaloids	N/A
Inubosin B	10.1021/np5006218	2015	NPA007494	Variant	Bioassay	Alkaloids	N/A
Inubosin A	10.1021/np5006218	2015	NPA016216	Variant	Bioassay	Alkaloids	N/A
Thiasporine A	10.1021/np500929z	2015	NPA009050	Original	Bioassay		N/A
Abyssomicin 2	10.1021/ol503349y	2015	NPA028394	Variant	Bioassay	Polyketides	N/A
Abyssomicin 4	10.1021/ol503349y	2015	NPA028395	Variant	Bioassay	Polyketides	N/A
Abyssomicin 3	10.1021/ol503349y	2015	NPA028396	Variant	Bioassay	Polyketides	N/A
Abyssomicin 5	10.1021/ol503349y	2015	NPA028397	Variant	Bioassay	Polyketides	N/A
Mohangamide A	10.1021/ol5037248	2015	NPA020219	Variant	Bioassay	Amino acids and Peptides, Polyketides	N/A
Mohangamide B	10.1021/ol5037248	2015	NPA020220	Variant	Bioassay	Amino acids and Peptides, Polyketides	N/A
Bafilomycin L	10.1038/ja.2014.100	2015	NPA029934	Variant	Bioassay	Polyketides	N/A
Novonestmycin B	10.1038/ja.2014.123	2015	NPA002788	Variant	Bioassay		N/A
Novonestmycin A	10.1038/ja.2014.123	2015	NPA004859	Variant	Bioassay	Polyketides	N/A
Diastaphenazine	10.1038/ja.2014.124	2015	NPA032833	Variant	Bioassay	Alkaloids	N/A
Not named	10.1038/ja.2014.151	2015	NPA029937	Variant	Bioassay		N/A
Not named	10.1038/ja.2014.151	2015	NPA029938	Variant	Bioassay		N/A
Not named	10.1038/ja.2015.38	2015	NPA029943	Variant	Bioassay	Alkaloids, Amino acids and Peptides	N/A
13-deoxytetrodecamycin	10.1038/ja.2015.60	2015	NPA017723	Variant	Bioassay		N/A
21-hydroxy oligomycin C	10.1039/c5ob02020d	2015	NPA001760	Variant	Bioassay	Polyketides	N/A
40-hydroxy oligomycin B	10.1039/c5ob02020d	2015	NPA013095	Variant	Bioassay	Polyketides	N/A
Humidimycin	10.1128/aac.00683-15	2015	NPA018275	Variant	Bioassay	Amino acids and Peptides	N/A
Not named	10.1186/s40659-015-0046-3	2015	NPA015183	Variant	Bioassay	Polyketides	N/A
7-cyano-7-deazaguanine	10.2174/1871520614666141027144653	2015	NPA030018	Original	Bioassay	Amino acids and Peptides, Shikimates and Phenylpropanoids	N/A
(2-isobutoxyphenyl)amine	10.3389/fmicb.2015.01235	2015	NPA030019	Original	Bioassay	Alkaloids	N/A
28-N-methylikarugamycin	10.3390/md13010128	2015	NPA004581	Variant	Bioassay	Amino acids and Peptides, Polyketides	N/A
30-oxo-28-N-methylikarugamycin	10.3390/md13010128	2015	NPA007140	Variant	Bioassay	Amino acids and Peptides, Polyketides	N/A
Isoikarugamycin	10.3390/md13010128	2015	NPA018618	Variant	Bioassay	Amino acids and Peptides, Polyketides	N/A
Marangucycline B	10.3390/md13031304	2015	NPA012231	Variant	Bioassay	Polyketides	N/A
Marangucycline A	10.3390/md13031304	2015	NPA018473	Variant	Bioassay	Polyketides	N/A
Isopimara-2-one-3-ol-8,15-diene	10.3390/md13095815	2015	NPA002059	Variant	Bioassay	Terpenoids	N/A
Lagumycin B	10.3390/md13095815	2015	NPA014379	Variant	Bioassay	Polyketides	N/A
Viridobrunnine B	10.3987/com-15-13285	2015	NPA003551	Variant	Bioassay	Alkaloids	N/A
Viridobrunnine A	10.3987/com-15-13285	2015	NPA009986	Variant	Bioassay	Alkaloids	N/A
Antarlide A	10.1002/anie.201510079	2016	NPA024326	Original	Bioassay	Polyketides	N/A
Antarlide E	10.1002/anie.201510079	2016	NPA024330	Variant	Bioassay	Polyketides	N/A
Antarlide B	10.1002/anie.201510079	2016	NPA024327	Variant	Bioassay	Polyketides	N/A
Antarlide C	10.1002/anie.201510079	2016	NPA024328	Variant	Bioassay	Polyketides	N/A
Antarlide D	10.1002/anie.201510079	2016	NPA024329	Variant	Bioassay	Polyketides	N/A
Dibohemamine A	10.1002/chem.201600024	2016	NPA030041	Original	Bioassay	Alkaloids	N/A
Dibohemamine C	10.1002/chem.201600024	2016	NPA030043	Variant	Bioassay	Alkaloids	N/A
Dibohemamine B	10.1002/chem.201600024	2016	NPA030042	Variant	Bioassay	Alkaloids	N/A
Pseudonocardide D	10.1002/hlca.201500109	2016	NPA030059	Original	Bioassay		N/A
Pseudonocardide E	10.1002/hlca.201500109	2016	NPA030060	Original	Bioassay	Fatty acids	N/A
Pseudonocardide A	10.1002/hlca.201500109	2016	NPA030056	Original	Bioassay	Fatty acids	N/A
Pseudonocardide G	10.1002/hlca.201500109	2016	NPA030062	Variant	Bioassay		N/A
Pseudonocardide B	10.1002/hlca.201500109	2016	NPA030057	Variant	Bioassay	Polyketides	N/A
Pseudonocardide C	10.1002/hlca.201500109	2016	NPA030058	Variant	Bioassay	Polyketides	N/A
Pseudonocardide F	10.1002/hlca.201500109	2016	NPA030061	Variant	Bioassay	Fatty acids	N/A
Glycerol 1-hydroxy-2,5-dimethyl benzoate	10.1007/s00253-016-7406-y	2016	NPA030064	Variant	Bioassay	Shikimates and Phenylpropanoids	N/A
2-methyl butyl propyl phthalate	10.1007/s13205-016-0398-6	2016	NPA030077	Original	Bioassay	Shikimates and Phenylpropanoids	N/A
Chrestoxanthone C	10.1016/j.tet.2015.12.045	2016	NPA003584	Variant	Bioassay	Polyketides	N/A
Chrestoxanthone A	10.1016/j.tet.2015.12.045	2016	NPA007098	Variant	Bioassay	Polyketides	N/A
Chrestoxanthone B	10.1016/j.tet.2015.12.045	2016	NPA015121	Variant	Bioassay	Polyketides	N/A
Not named	10.1016/j.tetlet.2016.02.061	2016	NPA023985	Variant	Bioassay	Polyketides	N/A
Ageloline A	10.1016/j.tetlet.2016.05.042	2016	NPA023986	Original	Bioassay	Alkaloids	N/A
Strepoxazine A	10.1016/j.tetlet.2016.08.005	2016	NPA023987	Original	Bioassay	Alkaloids	N/A
Bafilomycin M	10.1016/j.tetlet.2016.09.066	2016	NPA023991	Variant	Bioassay	Polyketides	N/A
Actinomadurol	10.1021/acs.jnatprod.6b00268	2016	NPA021980	Variant	Bioassay	Terpenoids	N/A
Rifsaliniketal	10.1021/jacs.6b03248	2016	NPA030135	Variant	Bioassay	Polyketides	N/A
PM100117	10.1038/ja.2015.121	2016	NPA021495	Variant	Bioassay	Polyketides	N/A
PM100118	10.1038/ja.2015.121	2016	NPA021496	Variant	Bioassay	Polyketides	N/A
Maniwamycin C	10.1038/ja.2015.126	2016	NPA021488	Original	Bioassay	Alkaloids	N/A
Maniwamycin F	10.1038/ja.2015.126	2016	NPA021491	Variant	Bioassay	Alkaloids	N/A
Maniwamycin D	10.1038/ja.2015.126	2016	NPA021489	Variant	Bioassay	Alkaloids	N/A
Maniwamycin E	10.1038/ja.2015.126	2016	NPA021490	Variant	Bioassay	Alkaloids	N/A
JBIR-76	10.1038/ja.2015.135	2016	NPA021522	Original	Bioassay	Polyketides	N/A
JBIR-77	10.1038/ja.2015.135	2016	NPA021523	Variant	Bioassay	Polyketides	N/A
AN483	10.1038/ja.2015.143	2016	NPA021529	Variant	Bioassay	Polyketides	N/A
Not named	10.1038/ja.2015.72	2016	NPA021465	Original	Bioassay	Alkaloids	N/A
Rocheicoside A	10.1038/ja.2015.72	2016	NPA021464	Variant	Bioassay	Carbohydrates	N/A
15-glycidylfilipin III	10.1038/ja.2015.76	2016	NPA021461	Variant	Bioassay	Polyketides	N/A
16β, 17β-epoxyfilipin V	10.1038/ja.2015.76	2016	NPA021462	Variant	Bioassay	Polyketides	N/A
16α, 17α-epoxyfilipin V	10.1038/ja.2015.76	2016	NPA021463	Variant	Bioassay	Polyketides	N/A
Streptanoate	10.1038/ja.2015.95	2016	NPA021487	Original	Bioassay	Alkaloids	N/A
Albaflavenoid	10.1038/ja.2016.12	2016	NPA021535	Variant	Bioassay	Terpenoids	N/A
Cahuitamycin A	10.1038/ncomms10710	2016	NPA030136	Variant	Bioassay	Amino acids and Peptides	N/A
Cahuitamycin B	10.1038/ncomms10710	2016	NPA030137	Variant	Bioassay	Amino acids and Peptides	N/A
Cahuitamycin C	10.1038/ncomms10710	2016	NPA030138	Variant	Bioassay	Amino acids and Peptides	N/A
Selvamicin	10.1073/pnas.1613285113	2016	NPA028457	Original	Bioassay	Polyketides	N/A
Pseudoverticin B	10.1080/10286020.2015.1137286	2016	NPA024137	Variant	Bioassay	Polyketides	N/A
Not named	10.1177/1934578x1601100116	2016	NPA031521	Original	Bioassay	Alkaloids	N/A
Not named	10.1177/1934578x1601100116	2016	NPA031522	Original	Bioassay	Polyketides	N/A
Acidiscalide	10.1177/1934578x1601100222	2016	NPA031524	Variant	Bioassay	Polyketides	N/A
Not named	10.1177/1934578x1601100320	2016	NPA031525	Variant	Bioassay	Alkaloids	N/A
Not named	10.3389/fmicb.2016.01467	2016	NPA030223	Variant	Bioassay	Amino acids and Peptides	N/A
N-1S-(4-methylaminophenylmethyl)-2-oxo-propyl acetamide	10.3390/md14100181	2016	NPA023107	Original	Bioassay	Amino acids and Peptides	N/A
2-acetylamino-3-hydroxyl-4-methyl-benzoic acid methyl ester	10.3390/md14100181	2016	NPA023108	Original	Bioassay	Alkaloids	N/A
3-hydroxy-10a-(3-chloro-6-hydroxy-2,2,6-trimethylcyclohexylmethyl)-6,8-dihydroxy-2,2-dimethyl-3,10a-dihydro-2H-benzo[g]chromene-5,10-dione (MDN-0170)	10.3390/md14100188	2016	NPA023109	Variant	Bioassay	Polyketides, Terpenoids	N/A
Halichoblelide D	10.3390/molecules21080970	2016	NPA030258	Variant	Bioassay	Polyketides	N/A
Deoxymutaaspergillic acid	10.3390/molecules21091116	2016	NPA030262	Original	Bioassay	Alkaloids, Amino acids and Peptides	N/A
(S)-6-(sec-butyl)-3-isopropylpyrazin-2(1H)-one	10.3390/molecules21091116	2016	NPA030259	Variant	Bioassay	Amino acids and Peptides	N/A
(S)-3-(sec-butyl)-6-isopropylpyrazin-2(1H)-one	10.3390/molecules21091116	2016	NPA030260	Variant	Bioassay	Amino acids and Peptides	N/A
(S)-6-(sec-butyl)-3-isobutylpyrazin-2(1H)-one	10.3390/molecules21091116	2016	NPA030261	Variant	Bioassay	Alkaloids, Amino acids and Peptides	N/A
1-Hydroxyauramycin T	10.3998/ark.5550190.0005.a10	2016	NPA007847	Variant	Bioassay	Polyketides	N/A
(7S*9S*10R*)-Pyrromycin	10.3998/ark.5550190.0005.a10	2016	NPA011036	Variant	Bioassay	Polyketides	N/A
Sphaericin	10.1002/ejoc.201601334	2017	NPA028320	Variant	Bioassay	Amino acids and Peptides	N/A
Leupeptazin	10.1016/j.bmcl.2017.02.007	2017	NPA028545	Original	Bioassay	Amino acids and Peptides	N/A
Pseudouridimycin	10.1016/j.cell.2017.05.042	2017	NPA002322	Original	Bioassay	Amino acids and Peptides	N/A
Streptodepsipeptide P11A	10.1016/j.phytochem.2016.12.010	2017	NPA023522	Variant	Bioassay	Amino acids and Peptides, Polyketides	N/A
Streptodepsipeptide P11B	10.1016/j.phytochem.2016.12.010	2017	NPA023523	Variant	Bioassay	Amino acids and Peptides, Polyketides	N/A
Marinocyanin C	10.1016/j.tet.2017.03.003	2017	NPA029039	Variant	Bioassay	Alkaloids	N/A
Marinocyanin D	10.1016/j.tet.2017.03.003	2017	NPA029040	Variant	Bioassay	Alkaloids	N/A
Marinocyanin E	10.1016/j.tet.2017.03.003	2017	NPA029041	Variant	Bioassay	Alkaloids	N/A
Marinocyanin F	10.1016/j.tet.2017.03.003	2017	NPA032400	Variant	Bioassay	Alkaloids	N/A
Bafilomycin N	10.1016/j.tet.2017.07.009	2017	NPA022903	Variant	Bioassay	Polyketides	N/A
Bafilomycin O	10.1016/j.tet.2017.07.009	2017	NPA022904	Variant	Bioassay	Polyketides	N/A
Neoabyssomicin C	10.1016/j.tet.2017.07.034	2017	NPA022908	Original	Bioassay	Polyketides	N/A
Neoabyssomicin A	10.1016/j.tet.2017.07.034	2017	NPA022906	Variant	Bioassay	Polyketides	N/A
Neoabyssomicin B	10.1016/j.tet.2017.07.034	2017	NPA022907	Variant	Bioassay	Polyketides	N/A
Actinomadurone	10.1016/j.tetlet.2017.07.008	2017	NPA024043	Original	Bioassay	Polyketides	N/A
Paramagnetoquinone A	10.1021/acs.jnatprod.6b00654	2017	NPA022213	Variant	Bioassay	Polyketides	N/A
Paramagnetoquinone B	10.1021/acs.jnatprod.6b00654	2017	NPA022214	Variant	Bioassay	Polyketides	N/A
Paramagnetoquinone C	10.1021/acs.jnatprod.6b00654	2017	NPA022215	Variant	Bioassay	Polyketides	N/A
Naphthablin B	10.1021/acs.jnatprod.6b00996	2017	NPA030408	Original	Bioassay	Polyketides	N/A
Naphthablin C	10.1021/acs.jnatprod.6b00996	2017	NPA030409	Variant	Bioassay	Polyketides	N/A
Streptenol I	10.1021/acs.jnatprod.6b01057	2017	NPA022237	Original	Bioassay	Polyketides	N/A
Streptenol F	10.1021/acs.jnatprod.6b01057	2017	NPA022234	Variant	Bioassay	Polyketides	N/A
Streptenol G	10.1021/acs.jnatprod.6b01057	2017	NPA022235	Variant	Bioassay	Polyketides	N/A
Streptenol H	10.1021/acs.jnatprod.6b01057	2017	NPA022236	Variant	Bioassay	Polyketides	N/A
Branimycin C	10.1021/acs.jnatprod.6b01107	2017	NPA022204	Variant	Bioassay	Polyketides	N/A
Branimycin B	10.1021/acs.jnatprod.6b01107	2017	NPA022203	Variant	Bioassay	Polyketides	N/A
Bagremycin C	10.1021/acs.jnatprod.6b01136	2017	NPA022306	Original	Bioassay	Shikimates and Phenylpropanoids	N/A
Bagremycin D	10.1021/acs.jnatprod.6b01136	2017	NPA022307	Original	Bioassay	Shikimates and Phenylpropanoids	N/A
Bagrelactone A	10.1021/acs.jnatprod.6b01136	2017	NPA022309	Original	Bioassay	Shikimates and Phenylpropanoids	N/A
Bagremycin E	10.1021/acs.jnatprod.6b01136	2017	NPA022308	Variant	Bioassay	Shikimates and Phenylpropanoids	N/A
Ornilactam A	10.1021/acs.jnatprod.7b00011	2017	NPA022252	Original	Bioassay	Alkaloids	N/A
Daryamide E	10.1021/acs.jnatprod.7b00011	2017	NPA022249	Variant	Bioassay	Polyketides	N/A
Daryamide F	10.1021/acs.jnatprod.7b00011	2017	NPA022250	Variant	Bioassay	Polyketides	N/A
Carpatamide D	10.1021/acs.jnatprod.7b00011	2017	NPA022251	Variant	Bioassay	Alkaloids	N/A
8-hydroxy-22-dehydroxymethylkijanolide	10.1021/acs.jnatprod.7b00176	2017	NPA022322	Original	Bioassay	Polyketides	N/A
22-dehydroxymethyl-kijanolide	10.1021/acs.jnatprod.7b00176	2017	NPA022321	Variant	Bioassay	Polyketides	N/A
Microsporanate A	10.1021/acs.jnatprod.7b00176	2017	NPA022323	Variant	Bioassay	Polyketides	N/A
Microsporanate B	10.1021/acs.jnatprod.7b00176	2017	NPA022324	Variant	Bioassay	Polyketides	N/A
Microsporanate C	10.1021/acs.jnatprod.7b00176	2017	NPA022325	Variant	Bioassay	Polyketides	N/A
Microsporanate D	10.1021/acs.jnatprod.7b00176	2017	NPA022326	Variant	Bioassay	Polyketides	N/A
Microsporanate E	10.1021/acs.jnatprod.7b00176	2017	NPA022327	Variant	Bioassay	Polyketides	N/A
Microsporanate F	10.1021/acs.jnatprod.7b00176	2017	NPA022328	Variant	Bioassay	Polyketides	N/A
Tetrocarcin P	10.1021/acs.jnatprod.7b00176	2017	NPA022329	Variant	Bioassay	Polyketides	N/A
Svetamycin A	10.1021/acs.joc.7b00228	2017	NPA024236	Original	Bioassay	Amino acids and Peptides, Polyketides	N/A
Svetamycin G	10.1021/acs.joc.7b00228	2017	NPA024242	Variant	Bioassay	Amino acids and Peptides	N/A
Svetamycin B	10.1021/acs.joc.7b00228	2017	NPA024237	Variant	Bioassay	Amino acids and Peptides	N/A
Svetamycin C	10.1021/acs.joc.7b00228	2017	NPA024238	Variant	Bioassay	Amino acids and Peptides, Polyketides	N/A
Svetamycin D	10.1021/acs.joc.7b00228	2017	NPA024239	Variant	Bioassay	Amino acids and Peptides	N/A
Svetamycin E	10.1021/acs.joc.7b00228	2017	NPA024240	Variant	Bioassay	Amino acids and Peptides	N/A
Svetamycin F	10.1021/acs.joc.7b00228	2017	NPA024241	Variant	Bioassay	Amino acids and Peptides	N/A
Sporalactam B	10.1021/acs.orglett.6b03619	2017	NPA023816	Variant	Bioassay	Polyketides	N/A
Sporalactam A	10.1021/acs.orglett.6b03619	2017	NPA023817	Variant	Bioassay	Polyketides	N/A
3-amino-27-demethoxy-27-hydroxyrifamycin S	10.1021/acs.orglett.6b03619	2017	NPA023818	Variant	Bioassay	Polyketides	N/A
3-amino-rifamycin S	10.1021/acs.orglett.6b03619	2017	NPA023819	Variant	Bioassay	Polyketides	N/A
Deplelide A	10.1021/acs.orglett.7b01807	2017	NPA023851	Variant	Bioassay	Polyketides	N/A
Deplelide B	10.1021/acs.orglett.7b01807	2017	NPA023852	Variant	Bioassay	Polyketides	N/A
Scopranone A	10.1021/acs.orglett.7b03003	2017	NPA023888	Original	Bioassay	Polyketides	N/A
Scopranone C	10.1021/acs.orglett.7b03003	2017	NPA023890	Variant	Bioassay	Polyketides	N/A
Scopranone Β	10.1021/acs.orglett.7b03003	2017	NPA023889	Variant	Bioassay	Polyketides	N/A
6"-cyano-6"-deoxy-TAN-1120	10.1038/ja.2016.112	2017	NPA021570	Variant	Bioassay	Polyketides	N/A
8'-epi-herbicidin F	10.1038/ja.2016.133	2017	NPA021574	Variant	Bioassay	Carbohydrates	N/A
6-amino-2,3-dimethylquinoline-5,8-dione	10.1038/ja.2016.142	2017	NPA021575	Variant	Bioassay	Alkaloids	N/A
2-hydroxy-3-methyl-8-(methylamino)naphthalene-5,6-dione	10.1038/ja.2016.142	2017	NPA021576	Variant	Bioassay	Polyketides	N/A
2,3-dimethyl-8-(methylamino)quinoline-5,6-dione	10.1038/ja.2016.142	2017	NPA021577	Variant	Bioassay	Polyketides	N/A
Kribelloside A	10.1038/ja.2016.161	2017	NPA021602	Variant	Bioassay	Fatty acids	N/A
Kribelloside B	10.1038/ja.2016.161	2017	NPA021603	Variant	Bioassay	Fatty acids	N/A
Kribelloside C	10.1038/ja.2016.161	2017	NPA021604	Variant	Bioassay	Fatty acids	N/A
Kribelloside D	10.1038/ja.2016.161	2017	NPA021605	Variant	Bioassay	Fatty acids	N/A
Allocyclinone A	10.1038/ja.2016.62	2017	NPA021547	Variant	Bioassay	Polyketides	N/A
Allocyclinone B	10.1038/ja.2016.62	2017	NPA021548	Variant	Bioassay	Polyketides	N/A
Allocyclinone C	10.1038/ja.2016.62	2017	NPA021549	Variant	Bioassay	Polyketides	N/A
Allocyclinone D	10.1038/ja.2016.62	2017	NPA021550	Variant	Bioassay	Polyketides	N/A
Not named	10.1038/ja.2016.63	2017	NPA021543	Variant	Bioassay	Amino acids and Peptides	N/A
Not named	10.1038/ja.2016.63	2017	NPA021544	Variant	Bioassay	Amino acids and Peptides	N/A
Vestaine A1	10.1038/ja.2016.98	2017	NPA021568	Original	Bioassay	No Pathway	N/A
Vestaine B1	10.1038/ja.2016.98	2017	NPA021569	Variant	Bioassay	No Pathway	N/A
Naphthacemycin A10	10.1038/ja.2017.29	2017	NPA021623	Variant	Bioassay	Polyketides	N/A
Naphthacemycin A11	10.1038/ja.2017.29	2017	NPA021624	Variant	Bioassay	Polyketides	N/A
Naphthacemycin B1	10.1038/ja.2017.29	2017	NPA021625	Variant	Bioassay	Polyketides	N/A
Naphthacemycin B2	10.1038/ja.2017.29	2017	NPA021626	Variant	Bioassay	Polyketides	N/A
Naphthacemycin B3	10.1038/ja.2017.29	2017	NPA021627	Variant	Bioassay	Polyketides	N/A
Naphthacemycin C2	10.1038/ja.2017.29	2017	NPA021628	Variant	Bioassay	Polyketides	N/A
Naphthacemycin A1	10.1038/ja.2017.29	2017	NPA021629	Variant	Bioassay	Polyketides	N/A
Naphthacemycin A2	10.1038/ja.2017.29	2017	NPA021630	Variant	Bioassay	Polyketides	N/A
Naphthacemycin A3	10.1038/ja.2017.29	2017	NPA021631	Variant	Bioassay	Polyketides	N/A
Naphthacemycin A4	10.1038/ja.2017.29	2017	NPA021632	Variant	Bioassay	Polyketides	N/A
Naphthacemycin A5	10.1038/ja.2017.29	2017	NPA021633	Variant	Bioassay	Polyketides	N/A
Naphthacemycin A6	10.1038/ja.2017.29	2017	NPA021634	Variant	Bioassay	Polyketides	N/A
Naphthacemycin A7	10.1038/ja.2017.29	2017	NPA021635	Variant	Bioassay	Polyketides	N/A
Naphthacemycin A8	10.1038/ja.2017.29	2017	NPA021636	Variant	Bioassay	Polyketides	N/A
Naphthacemycin A9	10.1038/ja.2017.29	2017	NPA021637	Variant	Bioassay	Polyketides	N/A
Naphthacemycin B4	10.1038/ja.2017.29	2017	NPA021638	Variant	Bioassay	Polyketides	N/A
Naphthacemycin C1	10.1038/ja.2017.29	2017	NPA021639	Variant	Bioassay	Polyketides	N/A
Ghanamycin A	10.1038/ja.2017.37	2017	NPA021642	Original	Bioassay	Fatty acids	N/A
Ghanamycin B	10.1038/ja.2017.37	2017	NPA021643	Variant	Bioassay	Fatty acids	N/A
Aurachin SS	10.1038/ja.2017.50	2017	NPA021662	Variant	Bioassay	Alkaloids	N/A
Tetracenoquinocin A	10.1038/ja.2017.95	2017	NPA021671	Variant	Bioassay	Polyketides	N/A
Formicamycin A	10.1039/c6sc04265a	2017	NPA028441	Variant	Bioassay	Polyketides	N/A
Formicamycin B	10.1039/c6sc04265a	2017	NPA028442	Variant	Bioassay	Polyketides	N/A
Formicamycin C	10.1039/c6sc04265a	2017	NPA028443	Variant	Bioassay	Polyketides	N/A
Formicamycin D	10.1039/c6sc04265a	2017	NPA028444	Variant	Bioassay	Polyketides	N/A
Formicamycin E	10.1039/c6sc04265a	2017	NPA028445	Variant	Bioassay	Polyketides	N/A
Formicamycin F	10.1039/c6sc04265a	2017	NPA028446	Variant	Bioassay	Polyketides	N/A
Formicamycin G	10.1039/c6sc04265a	2017	NPA028447	Variant	Bioassay	Polyketides	N/A
Formicamycin H	10.1039/c6sc04265a	2017	NPA028448	Variant	Bioassay	Polyketides	N/A
Formicamycin I	10.1039/c6sc04265a	2017	NPA028449	Variant	Bioassay	Polyketides	N/A
Formicamycin J	10.1039/c6sc04265a	2017	NPA028450	Variant	Bioassay	Polyketides	N/A
Formicamycin K	10.1039/c6sc04265a	2017	NPA028451	Variant	Bioassay	Polyketides	N/A
Formicamycin L	10.1039/c6sc04265a	2017	NPA028452	Variant	Bioassay	Polyketides	N/A
Formicamycin M	10.1039/c6sc04265a	2017	NPA028453	Variant	Bioassay	Polyketides	N/A
(R)-2-(1-methyl-2-oxopropylamino)-benzoic acid	10.1177/1934578x1701200310	2017	NPA031527	Original	Bioassay	Shikimates and Phenylpropanoids	N/A
Chromomycin A2-1	10.1177/1934578x1701200427	2017	NPA031528	Variant	Bioassay	Polyketides	N/A
Chromomycin A3-1	10.1177/1934578x1701200427	2017	NPA031529	Variant	Bioassay	Polyketides	N/A
Not named	10.1177/1934578x1701200427	2017	NPA031530	Variant	Bioassay	Polyketides	N/A
Not named	10.1177/1934578x1701200427	2017	NPA031531	Variant	Bioassay	Polyketides	N/A
Not named	10.1177/1934578x1701200427	2017	NPA031532	Variant	Bioassay	Polyketides	N/A
Not named	10.1177/1934578x1701200427	2017	NPA031533	Variant	Bioassay	Polyketides	N/A
(1S*,2R*,4R*,5S*,6R*,8R*)-1,2,4,5,6,8-hexamethyl-3,7,9-trioxabicyclo[3.3.1]nonane	10.3390/md15030071	2017	NPA023156	Original	Bioassay		N/A
N6,N6-dimethyladenosine	10.3390/md15030075	2017	NPA030532	Variant	Bioassay	Carbohydrates	N/A
Neoantimycin A	10.3390/molecules22040557	2017	NPA030545	Variant	Bioassay	Amino acids and Peptides, Polyketides	N/A
Neoantimycin B	10.3390/molecules22040557	2017	NPA030546	Variant	Bioassay	Amino acids and Peptides, Polyketides	N/A
Not named	10.1007/s00284-017-1358-z	2018	NPA030575	Original	Bioassay	Polyketides	N/A
Borrelidin F	10.1016/j.bmc.2018.01.010	2018	NPA027762	Variant	Bioassay	Polyketides	N/A
Borrelidin G	10.1016/j.bmc.2018.01.010	2018	NPA027763	Variant	Bioassay	Polyketides	N/A
Borrelidin I	10.1016/j.bmc.2018.01.010	2018	NPA027764	Variant	Bioassay	Polyketides	N/A
Borrelidin H	10.1016/j.bmc.2018.01.010	2018	NPA027765	Variant	Bioassay	Polyketides	N/A
Methyl-4,8-dimethylundecanate	10.1016/j.micpath.2018.05.025	2018	NPA030601	Variant	Bioassay	Fatty acids	N/A
Kocumarin	10.1016/j.micres.2017.10.007	2018	NPA030602	Original	Bioassay	Shikimates and Phenylpropanoids	N/A
3,4-dimethoxy-1-naphthamide	10.1016/j.phytol.2018.04.014	2018	NPA027692	Variant	Bioassay	Alkaloids	N/A
Nocardiopsistin A	10.1016/j.synbio.2018.10.008	2018	NPA030616	Variant	Bioassay	Polyketides	N/A
Nocardiopsistin B	10.1016/j.synbio.2018.10.008	2018	NPA030617	Variant	Bioassay	Polyketides	N/A
Nocardiopsistin C	10.1016/j.synbio.2018.10.008	2018	NPA030618	Variant	Bioassay	Polyketides	N/A
Streptocarbazole C	10.1016/j.tet.2017.12.048	2018	NPA022950	Variant	Bioassay	Alkaloids	N/A
3'-epi-K252d	10.1016/j.tet.2017.12.048	2018	NPA022951	Variant	Bioassay	Alkaloids	N/A
2',4'-epi-K252d	10.1016/j.tet.2017.12.048	2018	NPA022952	Variant	Bioassay	Alkaloids	N/A
Alokicenone D	10.1016/j.tet.2018.09.049	2018	NPA023014	Original	Bioassay	Polyketides	N/A
Alokicenone G	10.1016/j.tet.2018.09.049	2018	NPA023017	Original	Bioassay	Polyketides	N/A
Alokicenone H	10.1016/j.tet.2018.09.049	2018	NPA023018	Variant	Bioassay	Polyketides	N/A
Alokicenone A	10.1016/j.tet.2018.09.049	2018	NPA023011	Variant	Bioassay	Polyketides	N/A
Alokicenone B	10.1016/j.tet.2018.09.049	2018	NPA023012	Variant	Bioassay	Polyketides	N/A
Alokicenone C	10.1016/j.tet.2018.09.049	2018	NPA023013	Variant	Bioassay	Polyketides	N/A
Alokicenone E	10.1016/j.tet.2018.09.049	2018	NPA023015	Variant	Bioassay	Polyketides	N/A
Alokicenone F	10.1016/j.tet.2018.09.049	2018	NPA023016	Variant	Bioassay	Polyketides	N/A
N-acetyl-MY336-A	10.1016/j.tet.2018.11.001	2018	NPA023028	Original	Bioassay	Alkaloids	N/A
(E)-N-acetyl-MY336-A	10.1016/j.tet.2018.11.001	2018	NPA032409	Variant	Bioassay	Alkaloids	N/A
Astolide A	10.1016/j.tet.2018.11.015	2018	NPA023029	Variant	Bioassay	Polyketides	N/A
Astolide B	10.1016/j.tet.2018.11.015	2018	NPA023030	Variant	Bioassay	Polyketides	N/A
Herbicidin L	10.1021/acs.jnatprod.7b00850	2018	NPA022584	Variant	Bioassay	Carbohydrates	N/A
9-hydroxy-3'-N-acetylholyrine A	10.1021/acs.jnatprod.7b01058	2018	NPA022594	Variant	Bioassay	Alkaloids	N/A
9-hydroxyl-K252c	10.1021/acs.jnatprod.7b01058	2018	NPA022595	Variant	Bioassay	Alkaloids	N/A
Streptocarbazole E	10.1021/acs.jnatprod.7b01058	2018	NPA022596	Variant	Bioassay	Alkaloids	N/A
3-hydroxy-K252c	10.1021/acs.jnatprod.7b01058	2018	NPA022597	Variant	Bioassay	Alkaloids	N/A
3-hydroxy-7-methoxy-K252c	10.1021/acs.jnatprod.7b01058	2018	NPA022598	Variant	Bioassay	Alkaloids	N/A
3-hydroxy-3'-N-acetylholyrine A	10.1021/acs.jnatprod.7b01058	2018	NPA022599	Variant	Bioassay	Alkaloids	N/A
3-hydroxyholyrine A	10.1021/acs.jnatprod.7b01058	2018	NPA022600	Variant	Bioassay	Alkaloids	N/A
3'-O-demethyl-4'-N-demethyl-4'-N-acetyl-4'-epi-staurosporine	10.1021/acs.jnatprod.7b01058	2018	NPA022601	Variant	Bioassay	Alkaloids	N/A
Streptocarbazole D	10.1021/acs.jnatprod.7b01058	2018	NPA022602	Variant	Bioassay	Alkaloids	N/A
MDN-0185	10.1021/acs.jnatprod.8b00323	2018	NPA022742	Original	Bioassay	Polyketides	N/A
Strepoxepinmycin A	10.1021/acs.jnatprod.8b00544	2018	NPA022815	Variant	Bioassay	Polyketides	N/A
Strepoxepinmycin B	10.1021/acs.jnatprod.8b00544	2018	NPA022816	Variant	Bioassay	Polyketides	N/A
Strepoxepinmycin C	10.1021/acs.jnatprod.8b00544	2018	NPA022817	Variant	Bioassay	Polyketides	N/A
Strepoxepinmycin D	10.1021/acs.jnatprod.8b00544	2018	NPA022818	Variant	Bioassay	Polyketides	N/A
Soliseptide A	10.1021/acs.orglett.8b00142	2018	NPA023919	Variant	Bioassay	Amino acids and Peptides	N/A
Streptoseomycin	10.1021/acs.orglett.8b01006	2018	NPA023934	Variant	Bioassay	Polyketides	N/A
Biemamide E	10.1021/acs.orglett.8b01871	2018	NPA030669	Variant	Bioassay	Fatty acids	N/A
Biemamide C	10.1021/acs.orglett.8b01871	2018	NPA030667	Variant	Bioassay	Fatty acids	N/A
Biemamide D	10.1021/acs.orglett.8b01871	2018	NPA030668	Variant	Bioassay	Fatty acids	N/A
Phocoenamicin	10.1021/acsinfecdis.7b00105	2018	NPA030684	Original	Bioassay	Polyketides	N/A
2-amino-4-methoxy-5-cyanopyrrolo[2,3-d]pyrimidine	10.1038/ja.2017.100	2018	NPA021713	Variant	Bioassay	Alkaloids	N/A
Quadoctomycin	10.1038/ja.2017.140	2018	NPA021712	Variant	Bioassay	Polyketides	N/A
Asenjonamide C	10.1038/s41429-017-0012-0	2018	NPA021731	Original	Bioassay		N/A
Asenjonamide A	10.1038/s41429-017-0012-0	2018	NPA021729	Original	Bioassay	Alkaloids	N/A
Asenjonamide B	10.1038/s41429-017-0012-0	2018	NPA021730	Variant	Bioassay		N/A
Dipyrimicin A	10.1038/s41429-018-0028-0	2018	NPA021745	Variant	Bioassay	Alkaloids	N/A
Dipyrimicin B	10.1038/s41429-018-0028-0	2018	NPA021746	Variant	Bioassay	Alkaloids	N/A
Dolyemycin A	10.1038/s41429-018-0071-x	2018	NPA021803	Variant	Bioassay	Amino acids and Peptides	N/A
Dolyemycin B	10.1038/s41429-018-0071-x	2018	NPA021804	Variant	Bioassay	Amino acids and Peptides	N/A
Grincamycin L	10.1038/s41429-018-0096-1	2018	NPA032870	Variant	Bioassay	Polyketides	N/A
Grincamycin M	10.1038/s41429-018-0096-1	2018	NPA032871	Variant	Bioassay	Polyketides	N/A
Grincamycin N	10.1038/s41429-018-0096-1	2018	NPA032872	Variant	Bioassay	Polyketides	N/A
Microvionin	10.1038/s41589-018-0068-6	2018	NPA028427	Original	Bioassay	Amino acids and Peptides	N/A
Sipanmycin A	10.1128/AEM.01462-18	2018	NPA024680	Variant	Bioassay	Amino acids and Peptides, Polyketides	N/A
Sipanmycin B	10.1128/AEM.01462-18	2018	NPA024681	Variant	Bioassay	Amino acids and Peptides, Polyketides	N/A
N-acetylborrelidin B	10.1515/znc-2017-0140	2018	NPA030750	Variant	Bioassay	Polyketides	N/A
Lactomycin A	10.3390/md16020070	2018	NPA023294	Variant	Bioassay	Polyketides	N/A
Lactomycin B	10.3390/md16020070	2018	NPA023295	Variant	Bioassay	Polyketides	N/A
Lactomycin C	10.3390/md16020070	2018	NPA023296	Variant	Bioassay	Polyketides	N/A
Tetrocarcin Q	10.3390/md16020074	2018	NPA023299	Variant	Bioassay	Polyketides	N/A
Phocoenamicin B	10.3390/md16030095	2018	NPA023305	Variant	Bioassay	Polyketides	N/A
Phocoenamicin C	10.3390/md16030095	2018	NPA023306	Variant	Bioassay	Polyketides	N/A
Not named	10.3390/md16100371	2018	NPA030808	Original	Bioassay	Alkaloids	N/A
Not named	10.3390/md16100371	2018	NPA030810	Original	Bioassay	Alkaloids	N/A
Not named	10.3390/md16100371	2018	NPA030807	Variant	Bioassay	Alkaloids	N/A
Not named	10.3390/md16100371	2018	NPA030809	Variant	Bioassay	Alkaloids	N/A
Anthracimycin B	10.3390/md16110406	2018	NPA030812	Variant	Bioassay	Polyketides	N/A
Cebulantin	10.1002/anie.201901342	2019	NPA025668	Variant	Bioassay	Amino acids and Peptides	N/A
4-methoxyacetanilide	10.1007/s00203-019-01634-y	2019	NPA031034	Original	Bioassay	Alkaloids	N/A
Arabomycin	10.1007/s10600-019-02602-0	2019	NPA026869	Original	Bioassay	Polyketides	N/A
7-oxo-holyrin A	10.1016/j.bioorg.2018.09.016	2019	NPA031035	Variant	Bioassay	Alkaloids	N/A
4'-N-formyl-7-oxo-holyrin A	10.1016/j.bioorg.2018.09.016	2019	NPA031036	Variant	Bioassay	Alkaloids	N/A
3'-(hydroxyl(oxiran-2-yl)methoxy)-holyrine A	10.1016/j.bioorg.2018.09.016	2019	NPA031037	Variant	Bioassay	Alkaloids	N/A
3'-epi-5'-methoxy-K252d	10.1016/j.bioorg.2018.09.016	2019	NPA031038	Variant	Bioassay	Alkaloids	N/A
7-oxo-MLR-52	10.1016/j.bioorg.2018.09.016	2019	NPA031039	Variant	Bioassay	Alkaloids	N/A
7-oxo-K252b	10.1016/j.bioorg.2018.09.016	2019	NPA031040	Variant	Bioassay	Alkaloids	N/A
Amycophthalazinone A	10.1016/j.fitote.2019.04.011	2019	NPA026990	Original	Bioassay	Alkaloids	N/A
7-O-α-D-arabinofuranosyl daidzein	10.1016/j.fitote.2019.04.011	2019	NPA026988	Variant	Bioassay	Shikimates and Phenylpropanoids	N/A
7-O-methyl-5-O-α-L-rhamnopyranosylgenestein	10.1016/j.fitote.2019.04.011	2019	NPA026989	Variant	Bioassay	Shikimates and Phenylpropanoids	N/A
(1'S,2'R,3'R,4'R,5'R)-decilorene B	10.1016/j.phytol.2019.01.031	2019	NPA026020	Original	Bioassay	Polyketides	N/A
(1'R)-1,8-dihydroxy-2-(1-hydroxyethyl)-3-methylanthraquinone	10.1016/j.phytol.2019.01.031	2019	NPA026015	Variant	Bioassay	Polyketides	N/A
(7S,9R)-andicoquinone A	10.1016/j.phytol.2019.01.031	2019	NPA026016	Variant	Bioassay	Polyketides	N/A
(1'S,2'S,3'S,4'R,5'R)-andicoquinone B	10.1016/j.phytol.2019.01.031	2019	NPA026017	Variant	Bioassay	Polyketides	N/A
(7S,9R,1'S,2'S,3'S,4'R,5'R)-andicoquinone C	10.1016/j.phytol.2019.01.031	2019	NPA026018	Variant	Bioassay	Polyketides	N/A
(9S,1'S,2'S,3'S,4'R,5'R)-andicoquinone D	10.1016/j.phytol.2019.01.031	2019	NPA026019	Variant	Bioassay	Polyketides	N/A
18-acetylcyclooctatin	10.1016/j.tet.2019.01.025	2019	NPA025706	Variant	Bioassay	Terpenoids	N/A
5,18-dedihydroxycyclooctatin	10.1016/j.tet.2019.01.025	2019	NPA025707	Variant	Bioassay	Terpenoids	N/A
5-dehydroxycyclooctatin	10.1016/j.tet.2019.01.025	2019	NPA025708	Variant	Bioassay	Terpenoids	N/A
Streptoprenylindole B	10.1016/j.tet.2019.01.025	2019	NPA025709	Variant	Bioassay	Alkaloids	N/A
Streptoprenylindole A	10.1016/j.tet.2019.01.025	2019	NPA025710	Variant	Bioassay	Alkaloids	N/A
Streptoprenylindole C	10.1016/j.tet.2019.01.025	2019	NPA025711	Variant	Bioassay	Alkaloids	N/A
Isoirumamycin	10.1016/j.tetlet.2019.04.051	2019	NPA025617	Variant	Bioassay	Polyketides	N/A
Enduracyclinone A	10.1021/acs.jnatprod.8b00354	2019	NPA024980	Original	Bioassay	Polyketides	N/A
Enduracyclinone B	10.1021/acs.jnatprod.8b00354	2019	NPA024981	Variant	Bioassay	Polyketides	N/A
Strepantibin A	10.1021/acs.jnatprod.8b00821	2019	NPA025150	Variant	Bioassay	Shikimates and Phenylpropanoids	N/A
Strepantibin B	10.1021/acs.jnatprod.8b00821	2019	NPA025151	Variant	Bioassay	Shikimates and Phenylpropanoids	N/A
Strepantibin C	10.1021/acs.jnatprod.8b00821	2019	NPA025152	Variant	Bioassay	Shikimates and Phenylpropanoids	N/A
Naquihexcin K	10.1021/acs.jnatprod.9b00022	2019	NPA025265	Variant	Bioassay	Polyketides	N/A
Naquihexcin C	10.1021/acs.jnatprod.9b00022	2019	NPA025266	Variant	Bioassay	Polyketides	N/A
Naquihexcin D	10.1021/acs.jnatprod.9b00022	2019	NPA025267	Variant	Bioassay	Polyketides	N/A
Naquihexcin E	10.1021/acs.jnatprod.9b00022	2019	NPA025268	Variant	Bioassay	Polyketides	N/A
Naquihexcin F	10.1021/acs.jnatprod.9b00022	2019	NPA025269	Variant	Bioassay	Polyketides	N/A
Naquihexcin G	10.1021/acs.jnatprod.9b00022	2019	NPA025270	Variant	Bioassay	Polyketides	N/A
Naquihexcin H	10.1021/acs.jnatprod.9b00022	2019	NPA025271	Variant	Bioassay	Polyketides	N/A
Naquihexcin I	10.1021/acs.jnatprod.9b00022	2019	NPA025272	Variant	Bioassay	Polyketides	N/A
Naquihexcin J	10.1021/acs.jnatprod.9b00022	2019	NPA025273	Variant	Bioassay	Polyketides	N/A
Streptoglutarimide J	10.1021/acs.jnatprod.9b00481	2019	NPA025506	Original	Bioassay	Alkaloids	N/A
Streptoglutarimide A	10.1021/acs.jnatprod.9b00481	2019	NPA025497	Original	Bioassay	Alkaloids	N/A
Streptoglutarimide D	10.1021/acs.jnatprod.9b00481	2019	NPA025500	Original	Bioassay	Alkaloids	N/A
Streptoglutarimide C	10.1021/acs.jnatprod.9b00481	2019	NPA025499	Variant	Bioassay	Alkaloids	N/A
Streptoglutarimide F	10.1021/acs.jnatprod.9b00481	2019	NPA025502	Variant	Bioassay	Alkaloids	N/A
Streptoglutarimide B	10.1021/acs.jnatprod.9b00481	2019	NPA025498	Variant	Bioassay	Alkaloids	N/A
Streptoglutarimide E	10.1021/acs.jnatprod.9b00481	2019	NPA025501	Variant	Bioassay	Alkaloids	N/A
Streptoglutarimide G	10.1021/acs.jnatprod.9b00481	2019	NPA025503	Variant	Bioassay	Alkaloids	N/A
Streptoglutarimide H	10.1021/acs.jnatprod.9b00481	2019	NPA025504	Variant	Bioassay	Alkaloids	N/A
Streptoglutarimide I	10.1021/acs.jnatprod.9b00481	2019	NPA025505	Variant	Bioassay	Alkaloids	N/A
Nocarterphenyl B	10.1021/acs.jnatprod.9b00963	2019	NPA031102	Original	Bioassay	Shikimates and Phenylpropanoids	N/A
Nocarterphenyl A	10.1021/acs.jnatprod.9b00963	2019	NPA031101	Variant	Bioassay	Shikimates and Phenylpropanoids	N/A
Nocarterphenyl C	10.1021/acs.jnatprod.9b00963	2019	NPA031103	Variant	Bioassay	Shikimates and Phenylpropanoids	N/A
Atrovimycin	10.1021/acs.orglett.9b00618	2019	NPA026766	Variant	Bioassay	Amino acids and Peptides, Polyketides	N/A
(-)-madurastatin C1	10.1021/acs.orglett.9b02159	2019	NPA026821	Variant	Bioassay	Amino acids and Peptides	N/A
Madurastatin D1	10.1021/acs.orglett.9b02159	2019	NPA026822	Variant	Bioassay	Amino acids and Peptides	N/A
Madurastatin D2	10.1021/acs.orglett.9b02159	2019	NPA026823	Variant	Bioassay	Amino acids and Peptides	N/A
Taylorflavin A	10.1021/acschembio.9b00049	2019	NPA025864	Variant	Bioassay	Alkaloids	N/A
Hiroshidine	10.1021/acschembio.9b00049	2019	NPA025865	Variant	Bioassay	Polyketides	N/A
Aranciamycin K	10.1038/s41429-018-0103-6	2019	NPA024878	Variant	Bioassay	Polyketides	N/A
Isotirandamycin B	10.1038/s41429-018-0103-6	2019	NPA024879	Variant	Bioassay	Polyketides	N/A
Ala-geninthiocin	10.1038/s41429-018-0115-2	2019	NPA024884	Variant	Bioassay	Amino acids and Peptides	N/A
Akazamicin	10.1038/s41429-018-0139-7	2019	NPA024903	Variant	Bioassay	Polyketides	N/A
Caniferolide A	10.1039/c8ob03115k	2019	NPA025788	Variant	Bioassay	Polyketides	N/A
Caniferolide B	10.1039/c8ob03115k	2019	NPA025789	Variant	Bioassay	Polyketides	N/A
Caniferolide C	10.1039/c8ob03115k	2019	NPA025790	Variant	Bioassay	Polyketides	N/A
Caniferolide D	10.1039/c8ob03115k	2019	NPA025791	Variant	Bioassay	Polyketides	N/A
2,4-dichlorophenyl 2,4-dichloro benzoate	10.1177/1934578X1901400132	2019	NPA027105	Original	Bioassay	Shikimates and Phenylpropanoids	N/A
4,5-dihydroxy-7-methylphthalide	10.1177/1934578X1901400132	2019	NPA027104	Variant	Bioassay	Polyketides	N/A
Desertomycin G	10.3390/md17020114	2019	NPA026459	Variant	Bioassay	Polyketides	N/A
2-n-heptyl-4-hydroxyquinoline	10.3390/md17020133	2019	NPA026460	Variant	Bioassay	Alkaloids	N/A
2-n-octyl-4-hydroxyquinoline	10.3390/md17020133	2019	NPA026461	Variant	Bioassay	Alkaloids	N/A
2 heptyl 4 hydroxyquinoline 1 oxide	10.3390/md17020133	2019	NPA026462	Variant	Bioassay	Alkaloids	N/A
3-n-heptyl-3-hydroxy-1,2,3,4-tetrahydroquinoline-2,4-dione	10.3390/md17020133	2019	NPA026463	Variant	Bioassay	Alkaloids	N/A
Lansai E	10.3390/md17030186	2019	NPA026464	Original	Bioassay	Alkaloids	N/A
Lansai F	10.3390/md17030186	2019	NPA026465	Original	Bioassay	Alkaloids, Amino acids and Peptides	N/A
Daidzein-4'-(2-deoxy-α-L-fucopyranoside)	10.3390/md17050294	2019	NPA026495	Variant	Bioassay	Shikimates and Phenylpropanoids	N/A
Daidzein-7-(2-deoxy-α-L-fucopyranoside)	10.3390/md17050294	2019	NPA026496	Variant	Bioassay	Shikimates and Phenylpropanoids	N/A
Daidzein-4',7-di-(2-deoxy-α-L-fucopyranoside)	10.3390/md17050294	2019	NPA026497	Variant	Bioassay	Shikimates and Phenylpropanoids	N/A
Nitrosporeunol H	10.3390/md17060336	2019	NPA031208	Variant	Bioassay	Terpenoids	N/A
(2′′S)-5′-lavandulyl-2′-methoxy-2,4,4′,6′-tetrahydroxylchalcone	10.3390/md17090529	2019	NPA026641	Original	Bioassay	Shikimates and Phenylpropanoids	N/A
(2S,2′′S)-6-lavandulyl-7,4′-dimethoxy-5,2′-dihydroxylflavanone	10.3390/md17090529	2019	NPA026639	Variant	Bioassay	Shikimates and Phenylpropanoids	N/A
(2S,2′’S)-6-lavandulyl-5,7,2′,4′-tetrahydroxylflavanone	10.3390/md17090529	2019	NPA026640	Variant	Bioassay	Shikimates and Phenylpropanoids	N/A
Osmanicin	10.3390/molecules24122239	2019	NPA026150	Original	Bioassay	Alkaloids, Terpenoids	N/A
1'-deoxyfungichromin	10.3390/molecules24203686	2019	NPA026199	Variant	Bioassay	Polyketides	N/A
Cacaoidin	10.1002/anie.202005187	2020	NPA031549	Variant	Bioassay	Amino acids and Peptides, Polyketides	N/A
Rhizolutin	10.1002/anie.202009294	2020	NPA031553	Original	Bioassay		N/A
Trichostatic acid B	10.1016/j.bmcl.2020.126952	2020	NPA034511	Variant	Bioassay		N/A
Cinnoline-4-carboxylic acid	10.1021/acs.jafc.0c01974	2020	NPA033653	Variant	Bioassay	Alkaloids	N/A
Cinnoline-4-carboxamide	10.1021/acs.jafc.0c01974	2020	NPA033654	Variant	Bioassay	Alkaloids	N/A
Endostemonine A	10.1021/acs.jafc.9b06755	2020	NPA033587	Original	Bioassay		N/A
Endostemonine I	10.1021/acs.jafc.9b06755	2020	NPA033595	Variant	Bioassay		N/A
Endostemonine J	10.1021/acs.jafc.9b06755	2020	NPA033586	Variant	Bioassay	Alkaloids	N/A
Endostemonine B	10.1021/acs.jafc.9b06755	2020	NPA033588	Variant	Bioassay	Alkaloids	N/A
Endostemonine C	10.1021/acs.jafc.9b06755	2020	NPA033589	Variant	Bioassay	Alkaloids	N/A
Endostemonine D	10.1021/acs.jafc.9b06755	2020	NPA033590	Variant	Bioassay	Alkaloids	N/A
Endostemonine E	10.1021/acs.jafc.9b06755	2020	NPA033591	Variant	Bioassay		N/A
Endostemonine F	10.1021/acs.jafc.9b06755	2020	NPA033592	Variant	Bioassay		N/A
Endostemonine G	10.1021/acs.jafc.9b06755	2020	NPA033593	Variant	Bioassay	Alkaloids	N/A
Endostemonine H	10.1021/acs.jafc.9b06755	2020	NPA033594	Variant	Bioassay	Alkaloids	N/A
Boholamide A	10.1021/acs.jnatprod.0c00038	2020	NPA029633	Variant	Bioassay	Amino acids and Peptides, Polyketides	N/A
Viennamycin A	10.1021/acs.jnatprod.0c00152	2020	NPA029329	Variant	Bioassay	Amino acids and Peptides, Polyketides	N/A
Viennamycin B	10.1021/acs.jnatprod.0c00152	2020	NPA029330	Variant	Bioassay	Amino acids and Peptides, Polyketides	N/A
Fasamycin G	10.1021/acs.jnatprod.0c00161	2020	NPA029773	Variant	Bioassay	Polyketides	N/A
Fasamycin H	10.1021/acs.jnatprod.0c00161	2020	NPA029774	Variant	Bioassay	Polyketides	N/A
Fasamycin I	10.1021/acs.jnatprod.0c00161	2020	NPA029775	Variant	Bioassay	Polyketides	N/A
Fasamycin J	10.1021/acs.jnatprod.0c00161	2020	NPA029776	Variant	Bioassay	Polyketides	N/A
Fasamycin K	10.1021/acs.jnatprod.0c00161	2020	NPA029777	Variant	Bioassay	Polyketides	N/A
Formicamycin N	10.1021/acs.jnatprod.0c00161	2020	NPA029778	Variant	Bioassay	Polyketides	N/A
Formicamycin O	10.1021/acs.jnatprod.0c00161	2020	NPA029779	Variant	Bioassay	Polyketides	N/A
Formicamycin P	10.1021/acs.jnatprod.0c00161	2020	NPA029780	Variant	Bioassay	Polyketides	N/A
Formicamycin Q	10.1021/acs.jnatprod.0c00161	2020	NPA029781	Variant	Bioassay	Polyketides	N/A
Not named	10.1021/acs.jnatprod.0c00201	2020	NPA029470	Original	Bioassay	Amino acids and Peptides	N/A
Not named	10.1021/acs.jnatprod.0c00201	2020	NPA029468	Variant	Bioassay	Amino acids and Peptides	N/A
Not named	10.1021/acs.jnatprod.0c00201	2020	NPA029469	Variant	Bioassay	Amino acids and Peptides	N/A
Marinacarboline Q	10.1021/acs.jnatprod.0c00588	2020	NPA029379	Original	Bioassay	Alkaloids	N/A
Actinoallonaphthyridine A	10.1021/acs.jnatprod.0c00588	2020	NPA029381	Original	Bioassay	Alkaloids	N/A
Marinacarboline O	10.1021/acs.jnatprod.0c00588	2020	NPA029377	Original	Bioassay	Alkaloids	N/A
Marinacarboline P	10.1021/acs.jnatprod.0c00588	2020	NPA029378	Variant	Bioassay	Alkaloids	N/A
Marinacarboline M	10.1021/acs.jnatprod.0c00588	2020	NPA029374	Variant	Bioassay	Alkaloids	N/A
Marinacarboline N	10.1021/acs.jnatprod.0c00588	2020	NPA029375	Variant	Bioassay	Alkaloids	N/A
Marinacarboline E	10.1021/acs.jnatprod.0c00588	2020	NPA029376	Variant	Bioassay	Alkaloids	N/A
Caerulomycin N	10.1021/acs.jnatprod.0c00588	2020	NPA029380	Variant	Bioassay	Alkaloids	N/A
Marinacarboline F	10.1021/acs.jnatprod.0c00588	2020	NPA029382	Variant	Bioassay	Alkaloids	N/A
Marinacarboline G	10.1021/acs.jnatprod.0c00588	2020	NPA029383	Variant	Bioassay	Alkaloids	N/A
Marinacarboline H	10.1021/acs.jnatprod.0c00588	2020	NPA029384	Variant	Bioassay	Alkaloids	N/A
Marinacarboline I	10.1021/acs.jnatprod.0c00588	2020	NPA029385	Variant	Bioassay	Alkaloids	N/A
Marinacarboline J	10.1021/acs.jnatprod.0c00588	2020	NPA029386	Variant	Bioassay	Alkaloids	N/A
Marinacarboline K	10.1021/acs.jnatprod.0c00588	2020	NPA029387	Variant	Bioassay	Alkaloids	N/A
Marinacarboline L	10.1021/acs.jnatprod.0c00588	2020	NPA029388	Variant	Bioassay	Alkaloids	N/A
Naphthacemycin B8	10.1021/acs.jnatprod.9b00417	2020	NPA029712	Variant	Bioassay	Polyketides	N/A
Naphthacemycin B11	10.1021/acs.jnatprod.9b00417	2020	NPA029713	Variant	Bioassay	Polyketides	N/A
Naphthacemycin B12	10.1021/acs.jnatprod.9b00417	2020	NPA029714	Variant	Bioassay	Polyketides	N/A
Naphthacemycin B13	10.1021/acs.jnatprod.9b00417	2020	NPA029715	Variant	Bioassay	Polyketides	N/A
Naphthacemycin B6	10.1021/acs.jnatprod.9b00417	2020	NPA029716	Variant	Bioassay	Polyketides	N/A
Naphthacemycin B5	10.1021/acs.jnatprod.9b00417	2020	NPA029717	Variant	Bioassay	Polyketides	N/A
Naphthacemycin B9	10.1021/acs.jnatprod.9b00417	2020	NPA029718	Variant	Bioassay	Polyketides	N/A
Naphthacemycin B7	10.1021/acs.jnatprod.9b00417	2020	NPA029719	Variant	Bioassay	Polyketides	N/A
Naphthacemycin B10	10.1021/acs.jnatprod.9b00417	2020	NPA029720	Variant	Bioassay	Polyketides	N/A
Meliponamycin A	10.1021/acs.jnatprod.9b01011	2020	NPA029615	Variant	Bioassay	Amino acids and Peptides, Polyketides	N/A
Meliponamycin B	10.1021/acs.jnatprod.9b01011	2020	NPA029616	Variant	Bioassay	Amino acids and Peptides, Polyketides	N/A
Zelkovamycin C	10.1021/acs.orglett.0c03565	2020	NPA032258	Variant	Bioassay	Amino acids and Peptides	N/A
Zelkovamycin B	10.1021/acs.orglett.0c03565	2020	NPA032259	Variant	Bioassay	Amino acids and Peptides	N/A
Zelkovamycin E	10.1021/acs.orglett.0c03565	2020	NPA032260	Variant	Bioassay	Amino acids and Peptides	N/A
Zelkovamycin D	10.1021/acs.orglett.0c03565	2020	NPA032261	Variant	Bioassay	Amino acids and Peptides	N/A
Saccharopyrone	10.1038/s41429-019-0223-7	2020	NPA024955	Original	Bioassay	Polyketides	N/A
Saccharonoic acid	10.1038/s41429-019-0223-7	2020	NPA024956	Original	Bioassay		N/A
Caerulomycin M	10.1038/s41429-019-0223-7	2020	NPA024954	Variant	Bioassay	Alkaloids	N/A
6-deoxy-α-L-talopyranose 1-(6-chloro-1H-indole-3-carboxylate)	10.1038/s41429-019-0258-9	2020	NPA024970	Original	Bioassay		N/A
6-chloro-1H-indole-3-carboxaldehyde	10.1038/s41429-019-0258-9	2020	NPA024969	Variant	Bioassay	Alkaloids	N/A
Chresdihydrochalcone	10.1038/s41429-020-0298-1	2020	NPA029105	Original	Bioassay	Polyketides	N/A
Chresphenylacetone	10.1038/s41429-020-0298-1	2020	NPA029106	Original	Bioassay	Polyketides	N/A
(2S,2 ́ ́S)-6-Lavandulyl-7-methoxy-5,2 ́,4 ́-trihydroxylflavanone	10.1080/14786419.2018.1538219	2020	NPA031388	Variant	Bioassay	Shikimates and Phenylpropanoids	N/A
(2 ́ ́S)-5 ́-Lavandulyl-4 ́-methoxy-2,4,2 ́,6 ́-tetrahydroxylchalcone	10.1080/14786419.2018.1538219	2020	NPA031389	Variant	Bioassay	Shikimates and Phenylpropanoids	N/A
Lactoquinomycin C	10.1080/14786419.2018.1556265	2020	NPA034022	Variant	Bioassay	Polyketides	N/A
Lactoquinomycin D	10.1080/14786419.2018.1556265	2020	NPA034023	Variant	Bioassay	Polyketides	N/A
Grincamycin L	10.1080/14786419.2019.1577835	2020	NPA034089	Variant	Bioassay	Polyketides	N/A
Mycenolide A	10.1080/14786419.2019.1597351	2020	NPA034078	Variant	Bioassay		N/A
Lobophorin M	10.1080/14786419.2020.1797730	2020	NPA034175	Variant	Bioassay	Polyketides	N/A
Lobophorin L	10.1080/14786419.2020.1797730	2020	NPA034176	Variant	Bioassay	Polyketides	N/A
1,3-Benzodioxole-2-One-4-Carboxylamide	10.1177/1934578x20920042	2020	NPA033569	Original	Bioassay		N/A
Nonocarboline A	10.3390/antibiotics9030126	2020	NPA033552	Variant	Bioassay	Alkaloids	N/A
Nonocarboline B	10.3390/antibiotics9030126	2020	NPA033553	Variant	Bioassay	Alkaloids	N/A
Nonocarboline C	10.3390/antibiotics9030126	2020	NPA033554	Variant	Bioassay	Alkaloids	N/A
Nonocarboline D	10.3390/antibiotics9030126	2020	NPA033555	Variant	Bioassay	Alkaloids	N/A
Nonocarboline E	10.3390/antibiotics9030126	2020	NPA033556	Variant	Bioassay	Alkaloids	N/A
Litoralimycin A	10.3390/md18060280	2020	NPA030968	Variant	Bioassay	Amino acids and Peptides	N/A
Litoralimycin B	10.3390/md18060280	2020	NPA030969	Variant	Bioassay	Amino acids and Peptides	N/A
Streptothiazomycin A	10.3390/MD18080385	2020	NPA031002	Original	Bioassay	Alkaloids	N/A
Streptodiketopiperazine B	10.3390/MD18080385	2020	NPA031004	Original	Bioassay	Amino acids and Peptides	N/A
(S)-1-(3-ethylphenyl)-1,2-ethanediol	10.3390/MD18080385	2020	NPA031001	Variant	Bioassay		N/A
Streptodiketopiperazine A	10.3390/MD18080385	2020	NPA031003	Variant	Bioassay	Amino acids and Peptides	N/A
3-(3-Chloro-4-hydroxyphenyl)propionic acid	10.3390/md18090450	2020	NPA031020	Original	Bioassay	Shikimates and Phenylpropanoids	N/A
3-(3,5-dichloro-4-hydroxyphenyl)propanoic acid	10.3390/md18090450	2020	NPA031018	Variant	Bioassay		N/A
3-(3,5-dichloro-4-hydroxyphenyl)propanoic acid methyl ester	10.3390/md18090450	2020	NPA031019	Variant	Bioassay	Shikimates and Phenylpropanoids	N/A
Benditerpe-2,6,15-triene	10.1002/anie.202102453	2021	NPA034926	Original	Bioassay	Terpenoids	N/A
Benditerpenoic acid	10.1002/anie.202102453	2021	NPA031218	Variant	Bioassay	Terpenoids	N/A
Gausemycin A	10.1002/anie.202104528	2021	NPA033084	Variant	Bioassay	Amino acids and Peptides	N/A
Gausemycin B	10.1002/anie.202104528	2021	NPA033085	Variant	Bioassay	Amino acids and Peptides	N/A
Grincamycin P	10.1021/acs.jnatprod.1c00179	2021	NPA033291	Variant	Bioassay	Polyketides	N/A
Grincamycin Q	10.1021/acs.jnatprod.1c00179	2021	NPA033292	Variant	Bioassay	Polyketides	N/A
Grincamycin R	10.1021/acs.jnatprod.1c00179	2021	NPA033293	Variant	Bioassay	Polyketides	N/A
Grincamycin S	10.1021/acs.jnatprod.1c00179	2021	NPA033294	Variant	Bioassay	Polyketides	N/A
Grincamycin T	10.1021/acs.jnatprod.1c00179	2021	NPA033295	Variant	Bioassay	Polyketides	N/A
JBIR-155	10.1021/acs.orglett.1c01352	2021	NPA035553	Original	Bioassay	Fatty acids, Polyketides	N/A
Nocobactin NA-B	10.1038/s41429-020-00393-z	2021	NPA034800	Variant	Bioassay	Amino acids and Peptides, Polyketides	N/A
Sealutomicin C	10.1038/s41429-020-00402-1	2021	NPA034806	Variant	Bioassay	Polyketides	N/A
Sealutomicin A	10.1038/s41429-020-00402-1	2021	NPA034807	Variant	Bioassay	Polyketides	N/A
Sealutomicin B	10.1038/s41429-020-00402-1	2021	NPA034808	Variant	Bioassay	Polyketides	N/A
Sealutomicin D	10.1038/s41429-020-00402-1	2021	NPA034809	Variant	Bioassay	Polyketides	N/A
Chloptosin B	10.1038/s41429-020-0361-y	2021	NPA034798	Variant	Bioassay	Amino acids and Peptides	N/A
Chloptosin C	10.1038/s41429-020-0361-y	2021	NPA034799	Variant	Bioassay	Amino acids and Peptides	N/A
Boshramycinone A	10.1080/14786419.2019.1645658	2021	NPA035462	Variant	Bioassay	Polyketides	N/A
Boshramycinone B	10.1080/14786419.2019.1645658	2021	NPA035463	Variant	Bioassay	Polyketides	N/A
Boshramycinone C	10.1080/14786419.2019.1645658	2021	NPA035464	Variant	Bioassay	Polyketides	N/A
Albofungin A	10.3389/fmicb.2021.635268	2021	NPA033162	Variant	Bioassay	Polyketides	N/A
Albofungin B	10.3389/fmicb.2021.635268	2021	NPA033163	Variant	Bioassay	Polyketides	N/A
Amycolatomycin A	10.3390/antibiotics10030261	2021	NPA033557	Variant	Bioassay	Amino acids and Peptides	N/A
Amycolatomycin B	10.3390/antibiotics10030261	2021	NPA033558	Variant	Bioassay	Amino acids and Peptides	N/A
Lentzeacin A	10.3390/molecules26237197	2021	NPA034909	Variant	Bioassay	Alkaloids, Amino acids and Peptides	N/A
Lentzeacin B	10.3390/molecules26237197	2021	NPA034910	Variant	Bioassay	Alkaloids, Amino acids and Peptides	N/A
Lentzeacin C	10.3390/molecules26237197	2021	NPA034911	Variant	Bioassay	Alkaloids	N/A
Lentzeacin D	10.3390/molecules26237197	2021	NPA034912	Variant	Bioassay	Alkaloids, Amino acids and Peptides	N/A
Lentzeacin E	10.3390/molecules26237197	2021	NPA034913	Variant	Bioassay	Alkaloids, Amino acids and Peptides	N/A
Concanamycin H	10.1007/s10600-022-03689-8	2022	NPA034683	Variant	Bioassay	Polyketides	N/A
Nocardiopsistin D	10.1021/acs.orglett.2c02879	2022	NPA034990	Variant	Bioassay	Polyketides	N/A
Nocardiopsistin E	10.1021/acs.orglett.2c02879	2022	NPA034991	Variant	Bioassay	Polyketides	N/A
Nocardiopsistin F	10.1021/acs.orglett.2c02879	2022	NPA034992	Variant	Bioassay	Polyketides	N/A
Synnepyrrole A	10.1021/acschembio.2c00460	2022	NPA035846	Variant	Bioassay	Alkaloids	N/A
Synnepyrrole B	10.1021/acschembio.2c00460	2022	NPA035847	Variant	Bioassay	Alkaloids	N/A
Harundomycin A	10.1021/acschembio.2c00585	2022	NPA035845	Variant	Bioassay	Terpenoids	N/A
Clavamate B	10.1021/acschembio.2c00588	2022	NPA035850	Variant	Bioassay	Amino acids and Peptides	N/A
Gargantulide B	10.1039/d1qo01480c	2022	NPA033415	Original	Bioassay	Fatty acids	N/A
Gargantulide C	10.1039/d1qo01480c	2022	NPA033416	Variant	Bioassay	Fatty acids	N/A
Tsukalipid A	10.3390/md20070464	2022	NPA036012	Variant	Bioassay	Fatty acids	N/A
Tsukalipid B	10.3390/md20070464	2022	NPA036013	Variant	Bioassay	Fatty acids	N/A
6R,7S-Salinorcinol	10.3390/molecules27113569	2022	NPA035402	Variant	Bioassay	Polyketides	N/A
Salinacetamide	10.3390/molecules27113569	2022	NPA035403	Variant	Bioassay	Polyketides	N/A
6-(5-hydroxy-6-methylheptyl)-5,6-dihydro-2H-pyran-2-one	10.3390/molecules27175649	2022	NPA035408	Original	Bioassay	Polyketides	N/A
Selina-3,7(11)-diene	10.1002/anie.201209103	2013	NPA031221	Original	Genomic	Terpenoids	related
Desulfoclethramycin	10.1002/anie.201308136	2013	NPA032818	Variant	Genomic	Fatty acids	related
(4Z)-annimycin	10.1016/j.chembiol.2013.09.006	2013	NPA008749	Variant	Genomic	Alkaloids	strain-based
11′,12′-dehydroelaiophylin	10.1021/np4006794	2013	NPA009290	Variant	Genomic	Polyketides	related
11,11′-O,O-dimethyl-14′-deethyl-14′-methylelaiophylin	10.1021/np4006794	2013	NPA015982	Variant	Genomic	Polyketides	related
Not named	10.1038/ncomms3894	2013	NPA024833	Variant	Genomic	Amino acids and Peptides, Polyketides	unrelated
Not named	10.1038/ncomms3894	2013	NPA024834	Variant	Genomic	Amino acids and Peptides, Polyketides	unrelated
Not named	10.1038/ncomms3894	2013	NPA024835	Variant	Genomic	Amino acids and Peptides, Polyketides	unrelated
5-DMAIAN	10.1074/jbc.M112.436451	2013	NPA032817	Variant	Genomic	Alkaloids	related
16,17-Dihydroxycyclooctatin	10.5582/ddt.2013.v7.5.185	2013	NPA031450	Variant	Genomic	Terpenoids	related
Cacibiocin A	10.1002/cbic.201300712	2014	NPA018420	Original	Genomic	Shikimates and Phenylpropanoids	related
Cacibiocin B	10.1002/cbic.201300712	2014	NPA003913	Variant	Genomic	Shikimates and Phenylpropanoids	related
Colabomycin E	10.1002/cbic.201400068	2014	NPA020278	Variant	Genomic	Polyketides	related
Colabomycin F	10.1002/cbic.201400068	2014	NPA020279	Variant	Genomic	Polyketides	related
Colabomycin G	10.1002/cbic.201400068	2014	NPA020280	Variant	Genomic	Polyketides	related
Isopimara-8,15-dien-19-ol	10.1021/np500422d	2014	NPA005460	Variant	Genomic	Terpenoids	related
Juanlimycin A	10.1021/ol501072t	2014	NPA014665	Original	Genomic	Alkaloids	related
Juanlimycin B	10.1021/ol501072t	2014	NPA001621	Variant	Genomic	Alkaloids	related
Alkyldihydropyrone B	10.1038/ja.2014.80	2014	NPA000994	Variant	Genomic	Polyketides	related
Alkyldihydropyrone A	10.1038/ja.2014.80	2014	NPA007465	Variant	Genomic	Polyketides	related
Alkyldihydropyrone C	10.1038/ja.2014.80	2014	NPA011147	Variant	Genomic	Polyketides	related
Alkyldihydropyrone D	10.1038/ja.2014.80	2014	NPA017356	Variant	Genomic	Polyketides	related
Gaburedin A	10.1039/c3sc52536h	2014	NPA028617	Original	Genomic	Amino acids and Peptides	strain-based
Gaburedin D	10.1039/c3sc52536h	2014	NPA028620	Original	Genomic	Alkaloids	strain-based
Gaburedin E	10.1039/c3sc52536h	2014	NPA028621	Original	Genomic	Amino acids and Peptides	strain-based
Gaburedin B	10.1039/c3sc52536h	2014	NPA028618	Original	Genomic	Amino acids and Peptides	strain-based
Gaburedin F	10.1039/c3sc52536h	2014	NPA028622	Variant	Genomic	Amino acids and Peptides	strain-based
Gaburedin C	10.1039/c3sc52536h	2014	NPA028619	Variant	Genomic	Amino acids and Peptides	strain-based
Taromycin A	10.1073/pnas.1319584111	2014	NPA020360	Original	Genomic	Amino acids and Peptides	related
Cuevaene D	10.3762/bjoc.10.82	2014	NPA007531	Variant	Genomic		related
Chattamycin B	10.1002/cbic.201402577	2015	NPA013453	Variant	Genomic	Polyketides	related
Chattamycin A	10.1002/cbic.201402577	2015	NPA015468	Variant	Genomic	Polyketides	related
Desferri-peucechelin	10.1007/s10534-015-9866-4	2015	NPA032825	Variant	Genomic	Amino acids and Peptides	related
Gaudimycin D	10.1016/j.ymben.2014.12.006	2015	NPA020321	Variant	Genomic	Polyketides	related
Gaudimycin E	10.1016/j.ymben.2014.12.006	2015	NPA020322	Variant	Genomic	Polyketides	related
Neoansamycin A	10.1021/acs.orglett.5b01686	2015	NPA000866	Original	Genomic	Polyketides	unrelated
Neoansamycin B	10.1021/acs.orglett.5b01686	2015	NPA014425	Original	Genomic	Polyketides	unrelated
Neoansamycin C	10.1021/acs.orglett.5b01686	2015	NPA020137	Variant	Genomic	Polyketides	unrelated
Reedsmycin A	10.1039/c4ra15415k	2015	NPA028429	Variant	Genomic	Polyketides	related
Reedsmycin B	10.1039/c4ra15415k	2015	NPA028430	Variant	Genomic	Polyketides	related
Reedsmycin C	10.1039/c4ra15415k	2015	NPA028431	Variant	Genomic	Polyketides	related
Reedsmycin D	10.1039/c4ra15415k	2015	NPA028432	Variant	Genomic	Polyketides	related
Reedsmycin E	10.1039/c4ra15415k	2015	NPA028433	Variant	Genomic	Polyketides	related
Reedsmycin F	10.1039/c4ra15415k	2015	NPA028434	Variant	Genomic	Polyketides	related
Sioxanthin	10.1111/1462-2920.12669	2015	NPA030000	Variant	Genomic	Terpenoids	related
Ishigamide	10.1002/cbic.201600167	2016	NPA028318	Variant	Genomic	Fatty acids	strain-based
Surugamide F	10.1002/cbic.201600350	2016	NPA030040	Variant	Genomic	Amino acids and Peptides	unrelated
Hexaricin B	10.1007/s00253-015-7248-z	2016	NPA030063	Variant	Genomic	Polyketides	related
Ketomemicin B3	10.1021/acschembio.6b00046	2016	NPA028360	Variant	Genomic	Amino acids and Peptides	related
Ketomemicin B4	10.1021/acschembio.6b00046	2016	NPA028361	Variant	Genomic	Amino acids and Peptides	related
Vazabitide B	10.1038/nchembio.2181	2016	NPA001983	Original	Genomic	Alkaloids, Amino acids and Peptides	strain-based
Vazabitide A	10.1038/nchembio.2181	2016	NPA012786	Variant	Genomic	Amino acids and Peptides	strain-based
Tetrocarcin N	10.1039/c6ra17026a	2016	NPA030173	Variant	Genomic	Polyketides	strain-based
Tetrocarcin O	10.1039/c6ra17026a	2016	NPA030174	Variant	Genomic	Polyketides	strain-based
3,7,11-trimethyl-2,6,10-triene-1,14-tetradecyl dioic acid	10.3390/md14100184	2016	NPA030235	Original	Genomic	Fatty acids	strain-based
Not named	10.3390/molecules21091131	2016	NPA030265	Original	Genomic		strain-based
Not named	10.3390/molecules21091131	2016	NPA030263	Variant	Genomic		strain-based
Not named	10.3390/molecules21091131	2016	NPA030264	Variant	Genomic	Alkaloids	strain-based
Neotetrafibricin A	10.1002/anie.201611371	2017	NPA032846	Variant	Genomic	Polyketides	related
Neotetrafibricin B	10.1002/anie.201611371	2017	NPA032847	Variant	Genomic	Polyketides	related
Neomediomycin B	10.1002/anie.201611371	2017	NPA032848	Variant	Genomic	Fatty acids, Polyketides	related
Lydicene	10.1002/anie.201700565	2017	NPA024378	Original	Genomic	Terpenoids	unrelated
Qinimycin A	10.1021/acs.jnatprod.6b00478	2017	NPA022182	Original	Genomic	Polyketides	related
Qinimycin C	10.1021/acs.jnatprod.6b00478	2017	NPA022184	Variant	Genomic	Polyketides	related
Qinimycin B	10.1021/acs.jnatprod.6b00478	2017	NPA022183	Variant	Genomic	Polyketides	related
Ulleungmycin A	10.1021/acs.jnatprod.7b00660	2017	NPA022515	Variant	Genomic	Amino acids and Peptides	related
Yangpumicin A	10.1021/acs.orglett.7b03120	2017	NPA023891	Variant	Genomic	Polyketides	related
Yangpumicin B	10.1021/acs.orglett.7b03120	2017	NPA023892	Variant	Genomic	Polyketides	related
Yangpumicin C	10.1021/acs.orglett.7b03120	2017	NPA023893	Variant	Genomic	Polyketides	related
Yangpumicin D	10.1021/acs.orglett.7b03120	2017	NPA023894	Variant	Genomic	Polyketides	related
Yangpumicin E	10.1021/acs.orglett.7b03120	2017	NPA023895	Variant	Genomic	Polyketides	related
S56-P1	10.1021/acschembio.6b00818	2017	NPA028368	Original	Genomic	Amino acids and Peptides	strain-based
Surugamide H	10.1021/jacs.7b02716	2017	NPA022824	Variant	Genomic	Amino acids and Peptides	related
Surugamide I	10.1021/jacs.7b02716	2017	NPA022825	Variant	Genomic	Amino acids and Peptides	related
Surugamide J	10.1021/jacs.7b02716	2017	NPA022826	Variant	Genomic	Amino acids and Peptides	related
Acyl-surugamide A	10.1021/jacs.7b02716	2017	NPA022827	Variant	Genomic	Amino acids and Peptides	related
Albucyclone A	10.1021/jacs.7b02716	2017	NPA022828	Variant	Genomic	Amino acids and Peptides	related
Albucyclone B	10.1021/jacs.7b02716	2017	NPA022829	Variant	Genomic	Amino acids and Peptides	related
Albucyclone C	10.1021/jacs.7b02716	2017	NPA022830	Variant	Genomic	Amino acids and Peptides	related
Albucyclone D	10.1021/jacs.7b02716	2017	NPA022831	Variant	Genomic	Amino acids and Peptides	related
Albucyclone E	10.1021/jacs.7b02716	2017	NPA022832	Variant	Genomic	Amino acids and Peptides	related
Albucyclone F	10.1021/jacs.7b02716	2017	NPA022833	Variant	Genomic	Amino acids and Peptides	related
Albuquinone A	10.1021/jacs.7b02716	2017	NPA022834	Variant	Genomic	Polyketides	related
Surugamide F3	10.1021/jacs.7b02716	2017	NPA022835	Variant	Genomic	Amino acids and Peptides	related
Surugamide F2	10.1021/jacs.7b02716	2017	NPA022836	Variant	Genomic	Amino acids and Peptides	related
Surugamide G	10.1021/jacs.7b02716	2017	NPA022837	Variant	Genomic	Amino acids and Peptides	related
Achromosin	10.1038/ja.2016.108	2017	NPA021561	Original	Genomic	Amino acids and Peptides	related
Xantholipin B	10.1038/ja.2016.60	2017	NPA021546	Variant	Genomic	Polyketides	strain-based
LP2006	10.1038/nchembio.2319	2017	NPA028411	Variant	Genomic	Amino acids and Peptides	related
Citrulassin A	10.1038/nchembio.2319	2017	NPA028409	Variant	Genomic	Amino acids and Peptides, Polyketides	related
Lagmysin	10.1038/nchembio.2319	2017	NPA028410	Variant	Genomic	Amino acids and Peptides	related
Anantin B1	10.1038/nchembio.2319	2017	NPA028407	Variant	Genomic	Amino acids and Peptides	related
Anantin B2	10.1038/nchembio.2319	2017	NPA028408	Variant	Genomic	Amino acids and Peptides	related
Isopyochelin	10.1039/c6sc03533g	2017	NPA028625	Variant	Genomic	Alkaloids	related
Pactamide A	10.1039/c6sc03875a	2017	NPA028435	Variant	Genomic	Amino acids and Peptides, Polyketides	related
Pactamide B	10.1039/c6sc03875a	2017	NPA028436	Variant	Genomic	Amino acids and Peptides, Polyketides	related
Pactamide C	10.1039/c6sc03875a	2017	NPA028437	Variant	Genomic	Amino acids and Peptides, Polyketides	related
Pactamide D	10.1039/c6sc03875a	2017	NPA028438	Variant	Genomic	Amino acids and Peptides, Polyketides	related
Pactamide E	10.1039/c6sc03875a	2017	NPA028439	Variant	Genomic	Amino acids and Peptides, Polyketides	related
Pactamide F	10.1039/c6sc03875a	2017	NPA028440	Variant	Genomic	Amino acids and Peptides, Polyketides	related
Guangnanmycin A	10.1073/pnas.1716245115	2017	NPA028328	Original	Genomic	Amino acids and Peptides	related
Weishanmycin A	10.1073/pnas.1716245115	2017	NPA028329	Original	Genomic	Amino acids and Peptides	related
Weishanmycin A3	10.1073/pnas.1716245115	2017	NPA028462	Variant	Genomic	Amino acids and Peptides	related
Weishanmycin A1	10.1073/pnas.1716245115	2017	NPA028460	Variant	Genomic	Amino acids and Peptides	related
Weishanmycin A2	10.1073/pnas.1716245115	2017	NPA028461	Variant	Genomic	Amino acids and Peptides	related
(E)-13-methyl-5-(2,6,6-trimethyl-3-oxocyclohex-1-enyl)pent-2-enoic acid	10.1080/10286020.2017.1285909	2017	NPA024183	Original	Genomic	Terpenoids	related
(E)-3-methyl-5-(2,6,6-trimethyl-3-oxocyclohex-1-enyl)pent-2-enoic acid	10.1080/10286020.2017.1285909	2017	NPA024182	Variant	Genomic	Terpenoids	related
9-O-methyl-ansacarbamitocin A1	10.1080/10286020.2017.1285909	2017	NPA024184	Variant	Genomic	Polyketides	related
Actinokineosin	10.1111/lam.12693	2017	NPA028473	Variant	Genomic	Amino acids and Peptides	related
Mathermycin	10.1128/AEM.00926-17	2017	NPA028474	Variant	Genomic	Amino acids and Peptides	related
Somalimycin	10.3389/fmicb.2017.00678	2017	NPA030524	Variant	Genomic	Amino acids and Peptides, Polyketides	strain-based
WS9326G	10.1002/cbic.201700428	2018	NPA024437	Original	Genomic	Amino acids and Peptides	related
WS9326F	10.1002/cbic.201700428	2018	NPA024436	Variant	Genomic	Amino acids and Peptides	related
Auroramycin	10.1002/cbic.201800266	2018	NPA024449	Variant	Genomic	Amino acids and Peptides, Polyketides	related
Tiancilactone H	10.1002/cbic.201800285	2018	NPA031255	Original	Genomic	Terpenoids	unrelated
Tiancilactone A	10.1002/cbic.201800285	2018	NPA031248	Original	Genomic	Terpenoids	unrelated
Tiancilactone G	10.1002/cbic.201800285	2018	NPA031254	Variant	Genomic	Terpenoids	unrelated
Tiancilactone B	10.1002/cbic.201800285	2018	NPA031249	Variant	Genomic	Terpenoids	unrelated
Tiancilactone C	10.1002/cbic.201800285	2018	NPA031250	Variant	Genomic	Terpenoids	unrelated
Tiancilactone D	10.1002/cbic.201800285	2018	NPA031251	Variant	Genomic	Terpenoids	unrelated
Tiancilactone E	10.1002/cbic.201800285	2018	NPA031252	Variant	Genomic	Terpenoids	unrelated
Tiancilactone F	10.1002/cbic.201800285	2018	NPA031253	Variant	Genomic	Terpenoids	unrelated
19-carbonyl-xiamycin	10.1007/s00253-018-9337-2	2018	NPA030572	Variant	Genomic	Alkaloids	related
19-methoxyl-xiamycin	10.1007/s00253-018-9337-2	2018	NPA030573	Variant	Genomic	Alkaloids	related
19-hydroxyl-24-methyl ester-N-N-dixiamycin	10.1007/s00253-018-9337-2	2018	NPA030574	Variant	Genomic	Alkaloids, Terpenoids	related
Lavendiol	10.1007/s10295-017-1997-x	2018	NPA028327	Variant	Genomic	Polyketides	related
Olimycin A	10.1016/j.tet.2017.11.069	2018	NPA028342	Variant	Genomic	Polyketides	related
Olimycin B	10.1016/j.tet.2017.11.069	2018	NPA028343	Variant	Genomic	Amino acids and Peptides, Polyketides	related
Hydroxyikarugamycin A	10.1016/j.tet.2018.10.007	2018	NPA023019	Variant	Genomic	Amino acids and Peptides, Polyketides	related
Hydroxyikarugamycin B	10.1016/j.tet.2018.10.007	2018	NPA023020	Variant	Genomic	Amino acids and Peptides, Polyketides	related
Hydroxyikarugamycin C	10.1016/j.tet.2018.10.007	2018	NPA023021	Variant	Genomic	Amino acids and Peptides, Polyketides	related
Globimycin	10.1016/j.tetlet.2017.12.056	2018	NPA024066	Variant	Genomic	Amino acids and Peptides	related
Somaliensene A	10.1021/acs.jnatprod.7b01033	2018	NPA022618	Variant	Genomic	Terpenoids	related
Somaliensene B	10.1021/acs.jnatprod.7b01033	2018	NPA022619	Variant	Genomic	Terpenoids	related
Trienomycin J	10.1021/acs.jnatprod.8b00203	2018	NPA022787	Variant	Genomic	Polyketides	related
Trienomycin K	10.1021/acs.jnatprod.8b00203	2018	NPA022788	Variant	Genomic	Polyketides	related
Trienomycin L	10.1021/acs.jnatprod.8b00203	2018	NPA022789	Variant	Genomic	Polyketides	related
Ulleungdin	10.1021/acs.jnatprod.8b00449	2018	NPA032873	Variant	Genomic	Amino acids and Peptides	related
Mycemycin F	10.1021/acs.orglett.8b03373	2018	NPA030676	Variant	Genomic	Polyketides	strain-based
Mycemycin G	10.1021/acs.orglett.8b03373	2018	NPA030677	Variant	Genomic	Polyketides	strain-based
Mycemycin H	10.1021/acs.orglett.8b03373	2018	NPA030678	Variant	Genomic	Polyketides	strain-based
Saalfelduracin	10.1021/jacs.8b03896	2018	NPA024654	Variant	Genomic	Amino acids and Peptides	related
Salinichelin A	10.1038/ismej.2017.137	2018	NPA028401	Variant	Genomic	Amino acids and Peptides	related
Salinichelin B	10.1038/ismej.2017.137	2018	NPA028402	Variant	Genomic	Amino acids and Peptides	related
Salinichelin C	10.1038/ismej.2017.137	2018	NPA028403	Variant	Genomic	Amino acids and Peptides	related
Thioplatensimycin	10.1038/s41467-018-04747-y	2018	NPA031369	Variant	Genomic	Terpenoids	related
Thioplatencin	10.1038/s41467-018-04747-y	2018	NPA031370	Variant	Genomic	Terpenoids	related
Scleric acid	10.1039/c8sc03814g	2018	NPA032889	Original	Genomic		unrelated
Warkmycin CS1	10.3389/fmicb.2018.00039	2018	NPA024697	Variant	Genomic	Polyketides	strain-based
Warkmycin CS2	10.3389/fmicb.2018.00039	2018	NPA024698	Variant	Genomic	Polyketides	strain-based
Sipanmycin A	10.3389/fmicb.2018.00039	2018	NPA024699	Variant	Genomic	Amino acids and Peptides, Polyketides	strain-based
Sipanmycin B	10.3389/fmicb.2018.00039	2018	NPA024700	Variant	Genomic	Amino acids and Peptides, Polyketides	strain-based
Fluostatin M	10.3390/md16030087	2018	NPA023300	Variant	Genomic	Polyketides	strain-based
Fluostatin N	10.3390/md16030087	2018	NPA023301	Variant	Genomic	Polyketides	strain-based
Fluostatin O	10.3390/md16030087	2018	NPA023302	Variant	Genomic	Polyketides	strain-based
Fluostatin P	10.3390/md16030087	2018	NPA023303	Variant	Genomic	Polyketides	strain-based
Fluostatin Q	10.3390/md16030087	2018	NPA023304	Variant	Genomic	Polyketides	strain-based
Brevidiolide	10.3390/md16060191	2018	NPA023343	Original	Genomic	Shikimates and Phenylpropanoids	strain-based
Jomthonic acid D	10.3390/md16080259	2018	NPA023424	Variant	Genomic	Alkaloids	related
Jomthonic acid E	10.3390/md16080259	2018	NPA023425	Variant	Genomic	Polyketides	related
Jomthonic acid A	10.3390/md16080259	2018	NPA032526	Variant	Genomic	Alkaloids	related
Cattleyene	10.1002/anie.201902950	2019	NPA025669	Variant	Genomic	Terpenoids	related
Not named	10.1002/anie.201910882	2019	NPA033485	Original	Genomic	Polyketides	related
Not named	10.1002/anie.201910882	2019	NPA033478	Variant	Genomic	Polyketides	related
Not named	10.1002/anie.201910882	2019	NPA033479	Variant	Genomic	Polyketides	related
Not named	10.1002/anie.201910882	2019	NPA033480	Variant	Genomic	Polyketides	related
Not named	10.1002/anie.201910882	2019	NPA033481	Variant	Genomic	Polyketides	related
Not named	10.1002/anie.201910882	2019	NPA033482	Variant	Genomic	Polyketides	related
Not named	10.1002/anie.201910882	2019	NPA033483	Variant	Genomic	Polyketides	related
Not named	10.1002/anie.201910882	2019	NPA033484	Variant	Genomic	Polyketides	related
Streptophenazine Q	10.1016/j.chembiol.2019.02.004	2019	NPA033334	Variant	Genomic	Alkaloids	related
Streptophenazine R	10.1016/j.chembiol.2019.02.004	2019	NPA033335	Variant	Genomic	Alkaloids	related
Sarpeptin A	10.1021/acs.jnatprod.9b00074	2019	NPA025299	Original	Genomic	Amino acids and Peptides	unrelated
Sarpeptin B	10.1021/acs.jnatprod.9b00074	2019	NPA025300	Variant	Genomic	Amino acids and Peptides	unrelated
Atratumycin	10.1021/acs.orglett.9b00208	2019	NPA026739	Variant	Genomic	Amino acids and Peptides, Polyketides	strain-based
Angucyclinone	10.1021/acs.orglett.9b00800	2019	NPA026765	Original	Genomic	Alkaloids	unrelated
Ansaseomycin A	10.1021/acs.orglett.9b01237	2019	NPA026783	Original	Genomic	Polyketides	related
Aminoansamycin A	10.1021/acs.orglett.9b02804	2019	NPA026832	Original	Genomic	Polyketides	related
Aminoansamycin B	10.1021/acs.orglett.9b02804	2019	NPA026833	Original	Genomic	Alkaloids	related
Aminoansamycin G	10.1021/acs.orglett.9b02804	2019	NPA026838	Variant	Genomic		related
Aminoansamycin C	10.1021/acs.orglett.9b02804	2019	NPA026834	Variant	Genomic	Alkaloids	related
Aminoansamycin D	10.1021/acs.orglett.9b02804	2019	NPA026835	Variant	Genomic	Alkaloids	related
Aminoansamycin E	10.1021/acs.orglett.9b02804	2019	NPA026836	Variant	Genomic	Alkaloids	related
Aminoansamycin F	10.1021/acs.orglett.9b02804	2019	NPA026837	Variant	Genomic		related
Salinipeptin A	10.1021/acschembio.8b01058	2019	NPA025860	Variant	Genomic	Amino acids and Peptides, Polyketides	related
Salinipeptin B	10.1021/acschembio.8b01058	2019	NPA025861	Variant	Genomic	Amino acids and Peptides, Polyketides	related
Salinipeptin C	10.1021/acschembio.8b01058	2019	NPA025862	Variant	Genomic	Amino acids and Peptides, Polyketides	related
Salinipeptin D	10.1021/acschembio.8b01058	2019	NPA025863	Variant	Genomic	Amino acids and Peptides, Polyketides	related
Curacozole	10.1038/s41429-018-0105-4	2019	NPA024880	Variant	Genomic	Amino acids and Peptides	related
Sansanmycin Q	10.1038/s41429-019-0210-z	2019	NPA024940	Variant	Genomic	Amino acids and Peptides	related
Thiolactomycin IV	10.1038/s41587-019-0241-9	2019	NPA032923	Variant	Genomic	Polyketides	strain-based
Thiolactomycin II	10.1038/s41587-019-0241-9	2019	NPA032925	Variant	Genomic		strain-based
Thiolactomycin III	10.1038/s41587-019-0241-9	2019	NPA032926	Variant	Genomic		strain-based
5-chloro-3-formylindole	10.1038/s41587-019-0241-9	2019	NPA032922	Variant	Genomic	Alkaloids	strain-based
Phenanthroviridin	10.1038/s41587-019-0241-9	2019	NPA032924	Variant	Genomic	Polyketides	strain-based
Bamicetin	10.1038/s41587-019-0241-9	2019	NPA032927	Variant	Genomic	Carbohydrates	strain-based
Oxazolepoxidomycin A	10.1038/s41589-018-0187-0	2019	NPA032911	Original	Genomic	Polyketides	unrelated
Oxazoltriene acid	10.1038/s41589-018-0187-0	2019	NPA032913	Original	Genomic	Polyketides	unrelated
Butyrolactol	10.1038/s41589-018-0187-0	2019	NPA032910	Variant	Genomic	Polyketides	unrelated
Oxazoltetraene acid	10.1038/s41589-018-0187-0	2019	NPA032912	Variant	Genomic		unrelated
Ashimide A	10.1039/c8sc05670f	2019	NPA026369	Original	Genomic	Alkaloids, Amino acids and Peptides	unrelated
Ashimide B	10.1039/c8sc05670f	2019	NPA026370	Variant	Genomic	Alkaloids, Amino acids and Peptides	unrelated
Kitacinnamycin H	10.1039/c9sc00815b	2019	NPA026371	Variant	Genomic	Amino acids and Peptides, Polyketides	related
Kitacinnamycin G	10.1039/c9sc00815b	2019	NPA026372	Variant	Genomic	Amino acids and Peptides, Polyketides	related
Kitacinnamycin A	10.1039/c9sc00815b	2019	NPA032877	Variant	Genomic	Amino acids and Peptides, Polyketides	related
Kitacinnamycin B	10.1039/c9sc00815b	2019	NPA032878	Variant	Genomic	Amino acids and Peptides, Polyketides	related
Kitacinnamycin C	10.1039/c9sc00815b	2019	NPA032879	Variant	Genomic	Amino acids and Peptides, Polyketides	related
Kitacinnamycin D	10.1039/c9sc00815b	2019	NPA032880	Variant	Genomic	Amino acids and Peptides, Polyketides	related
Kitacinnamycin E	10.1039/c9sc00815b	2019	NPA032881	Variant	Genomic	Amino acids and Peptides, Polyketides	related
Kitacinnamycin F	10.1039/c9sc00815b	2019	NPA032882	Variant	Genomic	Amino acids and Peptides, Polyketides	related
Kitacinnamycin I	10.1039/c9sc00815b	2019	NPA032883	Variant	Genomic	Amino acids and Peptides, Polyketides	related
Kitacinnamycin J	10.1039/c9sc00815b	2019	NPA032884	Variant	Genomic	Amino acids and Peptides, Polyketides	related
Kitacinnamycin K	10.1039/c9sc00815b	2019	NPA032885	Variant	Genomic	Amino acids and Peptides, Polyketides	related
Kitacinnamycin L	10.1039/c9sc00815b	2019	NPA032886	Variant	Genomic	Amino acids and Peptides, Polyketides	related
Kitacinnamycin M	10.1039/c9sc00815b	2019	NPA032887	Variant	Genomic	Amino acids and Peptides, Polyketides	related
Kitacinnamycin N	10.1039/c9sc00815b	2019	NPA032888	Variant	Genomic	Amino acids and Peptides, Polyketides	related
Kitacinnamycin A	10.1039/c9sc00815b	2019	NPA033005	Variant	Genomic	Amino acids and Peptides, Polyketides	related
Kitacinnamycin B	10.1039/c9sc00815b	2019	NPA033006	Variant	Genomic	Amino acids and Peptides, Polyketides	related
Kitacinnamycin C	10.1039/c9sc00815b	2019	NPA033007	Variant	Genomic	Amino acids and Peptides, Polyketides	related
Kitacinnamycin D	10.1039/c9sc00815b	2019	NPA033008	Variant	Genomic	Amino acids and Peptides, Polyketides	related
Kitacinnamycin E	10.1039/c9sc00815b	2019	NPA033009	Variant	Genomic	Amino acids and Peptides, Polyketides	related
Kitacinnamycin F	10.1039/c9sc00815b	2019	NPA033010	Variant	Genomic	Amino acids and Peptides, Polyketides	related
Kitacinnamycin I	10.1039/c9sc00815b	2019	NPA033011	Variant	Genomic	Amino acids and Peptides, Polyketides	related
Kitacinnamycin J	10.1039/c9sc00815b	2019	NPA033012	Variant	Genomic	Amino acids and Peptides, Polyketides	related
Kitacinnamycin K	10.1039/c9sc00815b	2019	NPA033013	Variant	Genomic	Amino acids and Peptides, Polyketides	related
Kitacinnamycin L	10.1039/c9sc00815b	2019	NPA033014	Variant	Genomic	Amino acids and Peptides, Polyketides	related
Kitacinnamycin M	10.1039/c9sc00815b	2019	NPA033015	Variant	Genomic	Amino acids and Peptides, Polyketides	related
Kitacinnamycin N	10.1039/c9sc00815b	2019	NPA033016	Variant	Genomic	Amino acids and Peptides, Polyketides	related
Leepeptin	10.1128/AEM.01752-19	2019	NPA027201	Variant	Genomic	Amino acids and Peptides	related
16-demethylrifamycin S	10.1128/AEM.02597-18	2019	NPA027202	Variant	Genomic	Polyketides	strain-based
16-demethylrifamycin W hemiacetal	10.1128/AEM.02597-18	2019	NPA027203	Variant	Genomic	Polyketides	strain-based
16-demethyl-34a-dehydroxy rifamycin W	10.1128/AEM.02597-18	2019	NPA027204	Variant	Genomic	Polyketides	strain-based
16-demethylrifamycin W	10.1128/AEM.02597-18	2019	NPA027205	Variant	Genomic	Polyketides	strain-based
(3E,6E,8E,10R,11R,12E)-11-hydroxy-4,8,10,12-tetramethyltetradeca-3,6,8,12-tetraenoic acid	10.3390/md17010012	2019	NPA026438	Original	Genomic	Polyketides	strain-based
3-((3E,6E,8E,10R,11R,12E)-11-hydroxy-4,8,10,12-tetramethyltetradeca-3,6,8,12-tetraenamido)butanoic acid	10.3390/md17010012	2019	NPA026437	Variant	Genomic	Polyketides	strain-based
10-epi-HSAF	10.3390/md17120663	2019	NPA026677	Variant	Genomic	Amino acids and Peptides, Polyketides	related
10-epi-3-deOH-HSAF	10.3390/md17120663	2019	NPA026678	Variant	Genomic	Amino acids and Peptides, Polyketides	related
10-epi-maltophilin	10.3390/md17120663	2019	NPA026679	Variant	Genomic	Amino acids and Peptides, Polyketides	related
10-epi-xanthobaccin C	10.3390/md17120663	2019	NPA026680	Variant	Genomic	Amino acids and Peptides, Polyketides	related
10-epi-hydroxymaltophilin	10.3390/md17120663	2019	NPA026681	Variant	Genomic	Amino acids and Peptides, Polyketides	related
10-epi-FI-2	10.3390/md17120663	2019	NPA026682	Variant	Genomic	Amino acids and Peptides, Polyketides	related
Pretilactam	10.3390/molecules24122281	2019	NPA026151	Variant	Genomic	Amino acids and Peptides, Polyketides	related
Terpenibactin A	10.1002/cbic.202000062	2020	NPA031985	Variant	Genomic	Amino acids and Peptides, Polyketides	related
Terpenibactin B	10.1002/cbic.202000062	2020	NPA031986	Variant	Genomic	Amino acids and Peptides, Polyketides	related
Terpenibactin C	10.1002/cbic.202000062	2020	NPA031987	Variant	Genomic	Amino acids and Peptides, Polyketides	related
Felipeptin A1	10.1016/j.isci.2020.101785	2020	NPA033533	Variant	Genomic	Amino acids and Peptides	related
Felipeptin A2	10.1016/j.isci.2020.101785	2020	NPA033534	Variant	Genomic	Amino acids and Peptides	related
Clifednamide D	10.1021/acs.jnatprod.0c00900	2020	NPA029427	Original	Genomic	Polyketides	related
Clifednamide H	10.1021/acs.jnatprod.0c00900	2020	NPA029431	Variant	Genomic	Polyketides	related
Clifednamide E	10.1021/acs.jnatprod.0c00900	2020	NPA029428	Variant	Genomic	Amino acids and Peptides, Polyketides	related
Clifednamide F	10.1021/acs.jnatprod.0c00900	2020	NPA029429	Variant	Genomic	Amino acids and Peptides, Polyketides	related
Clifednamide G	10.1021/acs.jnatprod.0c00900	2020	NPA029430	Variant	Genomic	Polyketides	related
Clifednamide I	10.1021/acs.jnatprod.0c00900	2020	NPA029432	Variant	Genomic	Amino acids and Peptides, Polyketides	related
Clifednamide J	10.1021/acs.jnatprod.0c00900	2020	NPA029433	Variant	Genomic	Amino acids and Peptides, Polyketides	related
Huascopeptin	10.1021/acs.joc.9b02231	2020	NPA032097	Variant	Genomic	Amino acids and Peptides	related
Streptoketide C	10.1021/acs.joc.9b02741	2020	NPA032111	Original	Genomic	Polyketides, Shikimates and Phenylpropanoids	related
Streptoketide A	10.1021/acs.joc.9b02741	2020	NPA032109	Original	Genomic	Polyketides	related
Streptoketide B	10.1021/acs.joc.9b02741	2020	NPA032110	Variant	Genomic	Polyketides	related
Incarnatapeptin A	10.1021/acs.orglett.0c00818	2020	NPA028578	Variant	Genomic	Amino acids and Peptides	strain-based
Incarnatapeptin B	10.1021/acs.orglett.0c00818	2020	NPA028579	Variant	Genomic	Amino acids and Peptides, Polyketides	strain-based
Loonamycin A	10.1021/acs.orglett.0c01456	2020	NPA032309	Variant	Genomic	Alkaloids	related
Loonamycin B	10.1021/acs.orglett.0c01456	2020	NPA032310	Variant	Genomic	Alkaloids	related
Loonamycin C	10.1021/acs.orglett.0c01456	2020	NPA032311	Variant	Genomic	Alkaloids	related
Youssoufene A1	10.1021/acs.orglett.9b04559	2020	NPA032222	Original	Genomic	Polyketides	strain-based
Youssoufene B1	10.1021/acs.orglett.9b04559	2020	NPA032223	Variant	Genomic		strain-based
Youssoufene B2	10.1021/acs.orglett.9b04559	2020	NPA032224	Variant	Genomic		strain-based
Youssoufene B3	10.1021/acs.orglett.9b04559	2020	NPA032225	Variant	Genomic		strain-based
Youssoufene B4	10.1021/acs.orglett.9b04559	2020	NPA032226	Variant	Genomic		strain-based
Largimycin O1	10.1021/acschembio.0c00160	2020	NPA032052	Original	Genomic	Amino acids and Peptides	related
Largimycin A1	10.1021/acschembio.0c00160	2020	NPA032048	Original	Genomic		related
Largimycin A4	10.1021/acschembio.0c00160	2020	NPA032051	Variant	Genomic	Terpenoids	related
Largimycin A2	10.1021/acschembio.0c00160	2020	NPA032049	Variant	Genomic		related
Largimycin A3	10.1021/acschembio.0c00160	2020	NPA032050	Variant	Genomic		related
Phosphonoalamide A	10.1021/acschembio.0c00256	2020	NPA032059	Original	Genomic	Amino acids and Peptides	related
Phosphonoalamide D	10.1021/acschembio.0c00256	2020	NPA032062	Variant	Genomic	Amino acids and Peptides	related
Phosphonoalamide C	10.1021/acschembio.0c00256	2020	NPA032060	Variant	Genomic	Amino acids and Peptides	related
Phosphonoalamide B	10.1021/acschembio.0c00256	2020	NPA032061	Variant	Genomic	Amino acids and Peptides	related
Homopiloquinone	10.1021/acschembio.0c00581	2020	NPA033490	Original	Genomic	Polyketides	strain-based
Sungeidine A	10.1021/jacs.9b10086	2020	NPA032984	Original	Genomic		related
Sungeidine B	10.1021/jacs.9b10086	2020	NPA032985	Variant	Genomic		related
JBIR-156	10.1038/s41429-019-0265-x	2020	NPA029077	Variant	Genomic	Amino acids and Peptides, Polyketides	related
GP6738	10.1038/s41467-020-19138-5	2020	NPA033336	Original	Genomic	Amino acids and Peptides	related
Deacyl-GP1416	10.1038/s41467-020-19138-5	2020	NPA033337	Variant	Genomic	Amino acids and Peptides	related
Goadpeptin B	10.1038/s41557-020-0508-2	2020	NPA032962	Original	Genomic	Amino acids and Peptides	unrelated
Goadvionin A1	10.1038/s41557-020-0508-2	2020	NPA032963	Original	Genomic	Amino acids and Peptides	unrelated
Goadvionin B3	10.1038/s41557-020-0508-2	2020	NPA032969	Variant	Genomic	Amino acids and Peptides	unrelated
Goadvionin B2	10.1038/s41557-020-0508-2	2020	NPA032961	Variant	Genomic	Amino acids and Peptides	unrelated
Goadvionin A2	10.1038/s41557-020-0508-2	2020	NPA032964	Variant	Genomic	Amino acids and Peptides	unrelated
Goadvionin A3	10.1038/s41557-020-0508-2	2020	NPA032965	Variant	Genomic	Amino acids and Peptides	unrelated
Goadvionin A4	10.1038/s41557-020-0508-2	2020	NPA032966	Variant	Genomic	Amino acids and Peptides	unrelated
Goadvionin B1	10.1038/s41557-020-0508-2	2020	NPA032967	Variant	Genomic	Amino acids and Peptides	unrelated
Goadvionin B4	10.1038/s41557-020-0508-2	2020	NPA032968	Variant	Genomic	Amino acids and Peptides	unrelated
Corbomycin	10.1038/s41586-020-1990-9	2020	NPA033054	Variant	Genomic	Amino acids and Peptides	related
Bosamycin A	10.1039/d0sc03469j	2020	NPA031579	Original	Genomic	Amino acids and Peptides	unrelated
Bosamycin F	10.1039/d0sc03469j	2020	NPA031584	Variant	Genomic	Amino acids and Peptides	unrelated
Bosamycin B	10.1039/d0sc03469j	2020	NPA031580	Variant	Genomic	Amino acids and Peptides	unrelated
Bosamycin C	10.1039/d0sc03469j	2020	NPA031581	Variant	Genomic	Amino acids and Peptides	unrelated
Bosamycin D	10.1039/d0sc03469j	2020	NPA031582	Variant	Genomic	Amino acids and Peptides	unrelated
Bosamycin E	10.1039/d0sc03469j	2020	NPA031583	Variant	Genomic	Amino acids and Peptides	unrelated
O-(2-(3-methyloxiranyl) cinnamoyl) threonine	10.1080/14786419.2019.1573234	2020	NPA034045	Original	Genomic	Amino acids and Peptides	strain-based
[4-methyl-2-oxo-1-(1-methylpropyl)-3-(2-hydroxypropanamido)] pentyl carbamothioic acid	10.1080/14786419.2019.1574783	2020	NPA034090	Original	Genomic	Amino acids and Peptides	strain-based
FW0622	10.1080/14786419.2019.1608541	2020	NPA033340	Variant	Genomic	Fatty acids	related
Cutimycin	10.1126/scitranslmed.aay5445	2020	NPA033053	Variant	Genomic	Amino acids and Peptides	related
Kyamicin	10.1128/AEM.01876-19	2020	NPA033500	Variant	Genomic	Amino acids and Peptides	related
Pristinin A3	10.1371/journal.pbio.3001026	2020	NPA032995	Variant	Genomic	Amino acids and Peptides	related
Huimycin	10.3390/biom10071074	2020	NPA032936	Original	Genomic	Carbohydrates	unrelated
Dudomycin A	10.3390/microorganisms8111800	2020	NPA033496	Original	Genomic		unrelated
Dudomycin D	10.3390/microorganisms8111800	2020	NPA033497	Variant	Genomic		unrelated
Pentagumycin	10.3390/microorganisms8122034	2020	NPA033498	Original	Genomic	Polyketides	unrelated
SEK90	10.3390/microorganisms8122034	2020	NPA033499	Variant	Genomic	Polyketides	unrelated
Loseolamycin A1	10.3390/molecules25204594	2020	NPA033123	Variant	Genomic	Polyketides	related
Loseolamycin A2	10.3390/molecules25204594	2020	NPA033124	Variant	Genomic	Polyketides	related
Nocathioamide A	10.1002/anie.202102571	2021	NPA033270	Original	Genomic	Amino acids and Peptides	unrelated
Nocathioamide B	10.1002/anie.202102571	2021	NPA033271	Variant	Genomic	Amino acids and Peptides	unrelated
Nocathioamide C	10.1002/anie.202102571	2021	NPA033272	Variant	Genomic	Amino acids and Peptides	unrelated
Chersinamycin	10.1002/cbic.202000555	2021	NPA034945	Variant	Genomic	Amino acids and Peptides, Polyketides	related
Prunipeptin	10.1016/j.micres.2020.126669	2021	NPA033227	Variant	Genomic	Amino acids and Peptides	related
Hexacosalactone A	10.1021/acs.jnatprod.1c00144	2021	NPA033097	Original	Genomic	Polyketides	related
Saccharochelin A	10.1021/acs.jnatprod.1c00155	2021	NPA033296	Variant	Genomic	Amino acids and Peptides	related
Saccharochelin B	10.1021/acs.jnatprod.1c00155	2021	NPA033297	Variant	Genomic	Amino acids and Peptides	related
Saccharochelin C	10.1021/acs.jnatprod.1c00155	2021	NPA033298	Variant	Genomic	Amino acids and Peptides	related
Saccharochelin D	10.1021/acs.jnatprod.1c00155	2021	NPA033299	Variant	Genomic	Amino acids and Peptides	related
Saccharochelin E	10.1021/acs.jnatprod.1c00155	2021	NPA033300	Variant	Genomic	Amino acids and Peptides	related
Saccharochelin F	10.1021/acs.jnatprod.1c00155	2021	NPA033301	Variant	Genomic	Amino acids and Peptides	related
Saccharochelin G	10.1021/acs.jnatprod.1c00155	2021	NPA033302	Variant	Genomic	Amino acids and Peptides	related
Saccharochelin H	10.1021/acs.jnatprod.1c00155	2021	NPA033303	Variant	Genomic	Amino acids and Peptides	related
Shuangdaolide A	10.1021/acs.orglett.1c02589	2021	NPA033204	Original	Genomic	Polyketides	unrelated
Shuangdaolide B	10.1021/acs.orglett.1c02589	2021	NPA033205	Variant	Genomic	Polyketides	unrelated
Shuangdaolide C	10.1021/acs.orglett.1c02589	2021	NPA033206	Variant	Genomic	Polyketides	unrelated
Shuangdaolide D	10.1021/acs.orglett.1c02589	2021	NPA033207	Variant	Genomic	Polyketides	unrelated
Shuangdaolide E	10.1021/acs.orglett.1c02589	2021	NPA033208	Variant	Genomic	Polyketides	unrelated
Shuangdaolides F	10.1021/acs.orglett.1c02589	2021	NPA033209	Variant	Genomic	Polyketides	unrelated
JBIR-159	10.1038/s41429-021-00410-9	2021	NPA034813	Variant	Genomic	Polyketides	related
Guanipiperazine A	10.1039/d0sc06135b	2021	NPA033117	Original	Genomic	Alkaloids	unrelated
Guanipiperazine B	10.1039/d0sc06135b	2021	NPA033118	Variant	Genomic	Alkaloids	unrelated
Streptamidine	10.1039/d1sc01456k	2021	NPA033017	Original	Genomic	Amino acids and Peptides	unrelated
Stlassin	10.1039/d1sc02695j	2021	NPA033077	Variant	Genomic	Amino acids and Peptides	related
Ammosester A	10.1093/jimb/kuab027	2021	NPA033058	Original	Genomic	Alkaloids	related
Ammosester C	10.1093/jimb/kuab027	2021	NPA033060	Variant	Genomic	Alkaloids	related
Ammosester B	10.1093/jimb/kuab027	2021	NPA033059	Variant	Genomic	Alkaloids	related
Ammosamaic acid cogener	10.1093/jimb/kuab027	2021	NPA033061	Variant	Genomic	Alkaloids	related
Streptoazine B	10.1128/AEM.02525-20	2021	NPA034934	Variant	Genomic	Alkaloids, Amino acids and Peptides	related
Streptoazine C	10.1128/AEM.02525-20	2021	NPA034935	Variant	Genomic	Alkaloids, Amino acids and Peptides	related
Rubiginone J	10.1186/s12934-021-01681-5	2021	NPA033192	Variant	Genomic	Polyketides	related
Rubiginone K	10.1186/s12934-021-01681-5	2021	NPA033193	Variant	Genomic	Polyketides	related
Rubiginone L	10.1186/s12934-021-01681-5	2021	NPA033194	Variant	Genomic	Polyketides	related
Rubiginone M	10.1186/s12934-021-01681-5	2021	NPA033195	Variant	Genomic	Polyketides	related
Rubiginone N	10.1186/s12934-021-01681-5	2021	NPA033196	Variant	Genomic	Polyketides	related
Cyclofaulknamycin	10.3390/microorganisms9081609	2021	NPA033315	Variant	Genomic	Amino acids and Peptides	unrelated
Iso-faulknamycin	10.3390/microorganisms9081609	2021	NPA033316	Variant	Genomic	Amino acids and Peptides	unrelated
Bonsecamin	10.3390/microorganisms9081640	2021	NPA033317	Original	Genomic	Amino acids and Peptides	unrelated
Actinospene	10.3390/molecules26227020	2021	NPA034903	Variant	Genomic	Polyketides	related
(+)-Oryzanaphthopyran A	10.1002/anie.202202286	2022	NPA033393	Original	Genomic	Polyketides	unrelated
(-)-Oryzanaphthopyran C	10.1002/anie.202202286	2022	NPA033398	Variant	Genomic	Polyketides	unrelated
(-)-Oryzanaphthopyran A	10.1002/anie.202202286	2022	NPA033394	Variant	Genomic	Polyketides	unrelated
(+)-Oryzanaphthopyran B	10.1002/anie.202202286	2022	NPA033395	Variant	Genomic	Polyketides	unrelated
(-)-Oryzanaphthopyran B	10.1002/anie.202202286	2022	NPA033396	Variant	Genomic	Polyketides	unrelated
(+)-Oryzanaphthopyran C	10.1002/anie.202202286	2022	NPA033397	Variant	Genomic	Polyketides	unrelated
(+)-Oryzanthrone A	10.1002/anie.202202286	2022	NPA033399	Variant	Genomic	Polyketides	unrelated
(+)-Oryzanthrone B	10.1002/anie.202202286	2022	NPA033400	Variant	Genomic	Polyketides	unrelated
(-)-Oryzanthrone B	10.1002/anie.202202286	2022	NPA033401	Variant	Genomic	Polyketides	unrelated
(+)-chlorozanthrone A	10.1002/anie.202202286	2022	NPA033402	Variant	Genomic	Polyketides	unrelated
(+)-chlorozanthrone B	10.1002/anie.202202286	2022	NPA033403	Variant	Genomic	Polyketides	unrelated
WS-5995 D	10.1002/anie.202202286	2022	NPA033404	Variant	Genomic	Polyketides	related
Daspyromycin A	10.1016/j.cclet.2021.06.010	2022	NPA033391	Variant	Genomic	Amino acids and Peptides	related
Daspyromycin B	10.1016/j.cclet.2021.06.010	2022	NPA033392	Variant	Genomic	Amino acids and Peptides	related
Azabicyclene C	10.1038/s41564-022-01073-4	2022	NPA033406	Variant	Genomic	Alkaloids, Polyketides	strain-based
Azabicyclene D	10.1038/s41564-022-01073-4	2022	NPA033407	Variant	Genomic	Alkaloids	strain-based
Azabicyclene B	10.1038/s41564-022-01073-4	2022	NPA033409	Variant	Genomic	Polyketides	strain-based
Clipibicyclene	10.1038/s41564-022-01073-4	2022	NPA033408	Variant	Genomic	Alkaloids, Polyketides	strain-based
Actinotetraose J	10.1002/cbdv.201200224	2013	NPA004244	Variant	Metabolomic	Terpenoids	N/A
Actinotetraose K	10.1002/cbdv.201200224	2013	NPA007790	Variant	Metabolomic	Terpenoids	N/A
Actinotetraose I	10.1002/cbdv.201200224	2013	NPA010896	Variant	Metabolomic	Terpenoids	N/A
4(10)-Thujene (Sabinene)	10.1002/cbic.201300329	2013	NPA031243	Original	Metabolomic	Terpenoids	N/A
4-Thujanol (cis-Sabinene hydrate)	10.1002/cbic.201300329	2013	NPA031244	Original	Metabolomic	Terpenoids	N/A
7-O-methyl-8-chlorogenistein	10.1007/s10600-013-0440-4	2013	NPA016588	Variant	Metabolomic	Shikimates and Phenylpropanoids	N/A
Actinomiaolone	10.1007/s10600-013-0567-3	2013	NPA016164	Variant	Metabolomic	Fatty acids	N/A
NW-G12	10.1007/s10600-013-0775-x	2013	NPA018577	Variant	Metabolomic	Amino acids and Peptides	N/A
Venezueline B	10.1016/j.bmcl.2012.10.096	2013	NPA003095	Original	Metabolomic	Alkaloids	N/A
Venezueline F	10.1016/j.bmcl.2012.10.096	2013	NPA004034	Original	Metabolomic	Alkaloids	N/A
Venezueline C	10.1016/j.bmcl.2012.10.096	2013	NPA007734	Original	Metabolomic	Alkaloids	N/A
Venezueline G	10.1016/j.bmcl.2012.10.096	2013	NPA000156	Variant	Metabolomic	Alkaloids	N/A
Venezueline D	10.1016/j.bmcl.2012.10.096	2013	NPA000905	Variant	Metabolomic	Alkaloids	N/A
Venezueline A	10.1016/j.bmcl.2012.10.096	2013	NPA020132	Variant	Metabolomic	Alkaloids	N/A
Venezueline E	10.1016/j.bmcl.2012.10.096	2013	NPA020133	Variant	Metabolomic	Alkaloids	N/A
1-hydroxymethylindole-3-carboxylic acid	10.1016/j.phytol.2013.06.007	2013	NPA019279	Original	Metabolomic	Alkaloids	N/A
methyl 1-((2-methyl carbamate)ethyl)-β-carboline-3-carboxylate	10.1016/j.phytol.2013.06.007	2013	NPA000930	Variant	Metabolomic	Alkaloids	N/A
methyl 1-(propionic acid)-β-carboline-3-carboxylate	10.1016/j.phytol.2013.06.007	2013	NPA005754	Variant	Metabolomic	Alkaloids	N/A
1-Methylindole-3-carboxylic acid amide	10.1016/j.phytol.2013.06.007	2013	NPA010197	Variant	Metabolomic	Alkaloids	N/A
methyl 1-(methyl propionate)-β-carboline-3-carboxylate	10.1016/j.phytol.2013.06.007	2013	NPA011914	Variant	Metabolomic	Alkaloids	N/A
1-ethyl-β-carboline-3-carboxylic acid	10.1016/j.phytol.2013.06.007	2013	NPA017082	Variant	Metabolomic	Alkaloids	N/A
4α-(3,5-dihydroxy-heptyl)-3α-methyl-2-oxetanone	10.1016/j.phytol.2013.08.007	2013	NPA018832	Original	Metabolomic	Polyketides	N/A
4α-(3,5-dihydroxy-hexyl)-3α-methyl-2-oxetanone	10.1016/j.phytol.2013.08.007	2013	NPA006631	Variant	Metabolomic	Polyketides	N/A
4α-(3-methyl-4-formyloxy-heptyl)-3α-methyl-2-oxetanone	10.1016/j.phytol.2013.08.007	2013	NPA007742	Variant	Metabolomic	Polyketides	N/A
4α-(3-methyl-4-formyloxy-hexyl)-3α-methyl-2-oxetanone	10.1016/j.phytol.2013.08.007	2013	NPA017945	Variant	Metabolomic	Polyketides	N/A
Nocardiopyrone A	10.1016/j.tet.2012.10.104	2013	NPA001440	Variant	Metabolomic	Polyketides	N/A
Nocardiopsin D	10.1016/j.tet.2012.10.104	2013	NPA010343	Variant	Metabolomic	Amino acids and Peptides, Polyketides	N/A
Nocardiopsin C	10.1016/j.tet.2012.10.104	2013	NPA013054	Variant	Metabolomic	Amino acids and Peptides, Polyketides	N/A
Tianchimycin B	10.1016/j.tet.2013.05.094	2013	NPA000753	Original	Metabolomic	Polyketides	N/A
Tianchimycin A	10.1016/j.tet.2013.05.094	2013	NPA004602	Variant	Metabolomic	Polyketides	N/A
Cyanosporaside F	10.1021/ja311065v	2013	NPA019868	Original	Metabolomic	No Pathway	N/A
Cyanosporaside D	10.1021/ja311065v	2013	NPA010419	Original	Metabolomic	No Pathway	N/A
Cyanosporaside E	10.1021/ja311065v	2013	NPA016669	Variant	Metabolomic	No Pathway	N/A
Cyanosporaside C	10.1021/ja311065v	2013	NPA013770	Variant	Metabolomic	Polyketides	N/A
6′-hydroxy-4,2′,3′,4''-tetramethoxy-p-terphenyl	10.1021/jf400718w	2013	NPA001909	Variant	Metabolomic	Shikimates and Phenylpropanoids	N/A
4,7-bis(4-methoxyphenyl)-6-hydroxy-5-methoxybenzo[d]thiazole	10.1021/jf400718w	2013	NPA004136	Variant	Metabolomic	Shikimates and Phenylpropanoids	N/A
Ohmyungsamycin A	10.1021/jo401974g	2013	NPA011095	Original	Metabolomic	Amino acids and Peptides, Polyketides	N/A
Ohmyungsamycin B	10.1021/jo401974g	2013	NPA002531	Variant	Metabolomic	Amino acids and Peptides, Polyketides	N/A
Drimentine H	10.1021/np3008864	2013	NPA003599	Variant	Metabolomic	Terpenoids	N/A
Indotertine B	10.1021/np3008864	2013	NPA009413	Variant	Metabolomic	Amino acids and Peptides, Terpenoids	N/A
Sungsanpin	10.1021/np300902g	2013	NPA013213	Variant	Metabolomic	Amino acids and Peptides	N/A
Nocardiamide A	10.1021/np400009a	2013	NPA004392	Variant	Metabolomic	Amino acids and Peptides	N/A
Nocardiamide B	10.1021/np400009a	2013	NPA016522	Variant	Metabolomic	Amino acids and Peptides	N/A
Frenolicin G	10.1021/np400231r	2013	NPA014049	Variant	Metabolomic	Polyketides	N/A
Frenolicin C	10.1021/np400231r	2013	NPA003152	Variant	Metabolomic	Polyketides	N/A
Frenolicin F	10.1021/np400231r	2013	NPA012838	Variant	Metabolomic	Polyketides	N/A
Frenolicin E	10.1021/np400231r	2013	NPA017812	Variant	Metabolomic	Polyketides	N/A
Frenolicin D	10.1021/np400231r	2013	NPA020010	Variant	Metabolomic	Polyketides	N/A
Herbimycin F	10.1021/np400308w	2013	NPA014851	Original	Metabolomic	Polyketides	N/A
Herbimycin E	10.1021/np400308w	2013	NPA007973	Variant	Metabolomic	Polyketides	N/A
Herbimycin D	10.1021/np400308w	2013	NPA017242	Variant	Metabolomic	Polyketides	N/A
Farneside A	10.1021/np400351t	2013	NPA000059	Variant	Metabolomic		N/A
Farneside B	10.1021/np400351t	2013	NPA002682	Variant	Metabolomic		N/A
Apo-heterobactin S2	10.1021/np4006579	2013	NPA018083	Variant	Metabolomic	Amino acids and Peptides	N/A
Heterobactin A	10.1021/np4006579	2013	NPA003464	Variant	Metabolomic	Amino acids and Peptides	N/A
Strepsesquitriol	10.1021/np400923c	2013	NPA001752	Variant	Metabolomic	Terpenoids	N/A
Chlorizidine A	10.1021/ol303374e	2013	NPA008760	Original	Metabolomic	Alkaloids	N/A
Tripartin	10.1021/ol4004417	2013	NPA014092	Original	Metabolomic		N/A
Satosporin A	10.1021/ol401598f	2013	NPA014199	Original	Metabolomic	Polyketides	N/A
Satosporin B	10.1021/ol401598f	2013	NPA016785	Variant	Metabolomic	Polyketides	N/A
Actinoranone	10.1021/ol402080s	2013	NPA002228	Original	Metabolomic	Terpenoids	N/A
Nitrosporeusine A	10.1021/ol4026809	2013	NPA012131	Original	Metabolomic	Amino acids and Peptides	N/A
Nitrosporeusine B	10.1021/ol4026809	2013	NPA003887	Variant	Metabolomic	Amino acids and Peptides	N/A
Platencin A15	10.1038/ja.2013.1	2013	NPA031351	Variant	Metabolomic	Terpenoids	N/A
Platencin A14	10.1038/ja.2013.1	2013	NPA031352	Variant	Metabolomic	Terpenoids	N/A
Platencin A13	10.1038/ja.2013.1	2013	NPA031353	Variant	Metabolomic	Terpenoids	N/A
Platencin A12	10.1038/ja.2013.1	2013	NPA031354	Variant	Metabolomic	Terpenoids	N/A
Trehangelin A	10.1038/ja.2013.17	2013	NPA028404	Variant	Metabolomic	Terpenoids	N/A
Trehangelin B	10.1038/ja.2013.17	2013	NPA028405	Variant	Metabolomic	Terpenoids	N/A
Trehangelin C	10.1038/ja.2013.17	2013	NPA028406	Variant	Metabolomic	Terpenoids	N/A
Linearolide B	10.1038/ja.2013.19	2013	NPA008032	Original	Metabolomic	Polyketides	N/A
Linearolide A	10.1038/ja.2013.19	2013	NPA009991	Original	Metabolomic	Polyketides	N/A
Langkocycline B1	10.1038/ja.2013.53	2013	NPA016255	Original	Metabolomic	Polyketides	N/A
Langkocycline A2	10.1038/ja.2013.53	2013	NPA004153	Variant	Metabolomic	Polyketides	N/A
Langkocycline B2	10.1038/ja.2013.53	2013	NPA012649	Variant	Metabolomic	Polyketides	N/A
Langkocycline A1	10.1038/ja.2013.53	2013	NPA013436	Variant	Metabolomic	Polyketides	N/A
Langkocycline A3	10.1038/ja.2013.53	2013	NPA015989	Variant	Metabolomic	Polyketides	N/A
Warkmycin	10.1038/ja.2013.74	2013	NPA005004	Variant	Metabolomic	Polyketides	N/A
Gobichelin A	10.1039/c2md20232h	2013	NPA014123	Variant	Metabolomic	Amino acids and Peptides	N/A
Gobichelin B	10.1039/c2md20232h	2013	NPA020350	Variant	Metabolomic	Amino acids and Peptides	N/A
Scabichelin	10.1039/c3ob40536b	2013	NPA008731	Variant	Metabolomic	Amino acids and Peptides	N/A
Turgichelin	10.1039/c3ob40536b	2013	NPA019926	Variant	Metabolomic	Amino acids and Peptides	N/A
7,3'-di-(γ,γ-dimethylallyloxy)-5-hydroxy-4'-methoxyflavone	10.1080/10286020.2012.751979	2013	NPA009204	Original	Metabolomic	Shikimates and Phenylpropanoids	N/A
Streptazone E	10.1080/10286020.2012.761209	2013	NPA005197	Variant	Metabolomic	Alkaloids	N/A
Streptazone F	10.1080/10286020.2012.761209	2013	NPA013468	Variant	Metabolomic	Alkaloids	N/A
(E)-3-hydroxy-2,4-dimethylhept-4-enamide	10.1080/10286020.2012.762764	2013	NPA013929	Original	Metabolomic	Alkaloids	N/A
2(S)-3′-hydroxybutan-2′-yl 2-hydroxypropanoate	10.1080/10286020.2012.762764	2013	NPA018321	Original	Metabolomic		N/A
2-ethyl-7-hydroxy-6,7-dihydro-5H-indolizin-3-one	10.1080/10286020.2013.767246	2013	NPA017825	Original	Metabolomic		N/A
Trans-cyclo-(D-tryptophanyl-L-tyrosyl)	10.1080/14786419.2012.665911	2013	NPA010638	Variant	Metabolomic	Alkaloids, Amino acids and Peptides	N/A
Sarmentosamide	10.1080/14786419.2012.671313	2013	NPA006431	Original	Metabolomic	Alkaloids	N/A
Tsukubachelin B	10.1080/14786419.2012.698412	2013	NPA014995	Variant	Metabolomic	Amino acids and Peptides	N/A
3R,5R,6S,7E,9R-megastigman-7-en-3,5,6,9-tetrol-9-O-β-D-apiofuranosyl-(1→2)-β-D-glucopyranoside	10.1080/14786419.2012.718776	2013	NPA001940	Original	Metabolomic	Terpenoids	N/A
(R)-(E,E)-2-(1,3-pentadienyl)piperidine	10.1080/14786419.2012.718776	2013	NPA007101	Original	Metabolomic	Alkaloids	N/A
Cyclo(L-Pro-L-OMet)	10.1080/14786419.2012.718776	2013	NPA015809	Variant	Metabolomic	Amino acids and Peptides	N/A
Maytansinol-9-methyl ether-3-propionate	10.1080/14786419.2012.733388	2013	NPA001981	Variant	Metabolomic	Polyketides	N/A
Maytansinol-9-methyl ether-3-3'-methylbutyrate	10.1080/14786419.2012.733388	2013	NPA003767	Variant	Metabolomic	Polyketides	N/A
Levantilide C	10.1080/14786419.2012.740038	2013	NPA015056	Variant	Metabolomic	Polyketides	N/A
4R*,7S*,11S*,2H-3,4,4a,5a,7,8-hexhydro-4-hydroxy-pyrano[2,3-b]cyclopenta[d]pyran-9(6H)-one	10.1080/14786419.2013.771349	2013	NPA032723	Original	Metabolomic		N/A
7RS,11RS,2H-3,4,4a,5a,7,8-hexahydro-pyrano[2,3-b]cyclopenta[d]pyran-9(6H)-one	10.1080/14786419.2013.771349	2013	NPA000251	Variant	Metabolomic		N/A
4RS,7RS,11RS,2H-3,4,4a,5a,7,8-hexahydro-4-hydroxy-pyrano[2,3-b]cyclopenta[d]pyran-9(6H)-one	10.1080/14786419.2013.771349	2013	NPA003178	Variant	Metabolomic		N/A
2,3,4a,6,7,8-hexaahydro-pyrano[2,3-b]cyclopenta[d]pyran-9-one	10.1080/14786419.2013.771349	2013	NPA003256	Variant	Metabolomic		N/A
4RS,7SR,11SR,2H-3,4,4a,5a,7,8-hexahydro-4-hydroxy-pyrano[2,3-b]cyclopenta[d]pyran-9(6H)-one	10.1080/14786419.2013.771349	2013	NPA006918	Variant	Metabolomic		N/A
Not named	10.1080/14786419.2013.811658	2013	NPA007461	Original	Metabolomic	Terpenoids	N/A
Not named	10.1080/14786419.2013.811658	2013	NPA017340	Variant	Metabolomic	Amino acids and Peptides	N/A
Not named	10.1080/14786419.2013.811658	2013	NPA019074	Variant	Metabolomic	Polyketides, Shikimates and Phenylpropanoids	N/A
Arylomycin A6	10.1080/14786419.2013.811661	2013	NPA006780	Variant	Metabolomic	Amino acids and Peptides	N/A
3-((6-methylpyrazin-2-yl)methyl)-1H-indole	10.3390/md11010033	2013	NPA012850	Variant	Metabolomic	Alkaloids, Amino acids and Peptides	N/A
25-malonyl demalonylazalomycin F5a monoester	10.3390/md11030817	2013	NPA004301	Variant	Metabolomic	Polyketides	N/A
23-valine demalonylazalomycin F5a ester	10.3390/md11030817	2013	NPA006658	Variant	Metabolomic	Polyketides	N/A
23-(9-methyl)decanoic acid demalonylazalomycin F4a ester	10.3390/md11030817	2013	NPA008671	Variant	Metabolomic	Polyketides	N/A
23-(6-methyl)heptanoic acid demalonylazalomycin F5a ester	10.3390/md11030817	2013	NPA010635	Variant	Metabolomic	Polyketides	N/A
23-(6-methyl)heptanoic acid demalonylazalomycin F4a ester	10.3390/md11030817	2013	NPA011582	Variant	Metabolomic	Polyketides	N/A
23-(6-methyl)heptanoic acid demalonylazalomycin F3a ester	10.3390/md11030817	2013	NPA016349	Variant	Metabolomic	Polyketides	N/A
Tetroazolemycin B	10.3390/md11051524	2013	NPA003205	Variant	Metabolomic	Alkaloids	N/A
Tetroazolemycin A	10.3390/md11051524	2013	NPA011334	Variant	Metabolomic	Alkaloids	N/A
4-dehydro-4a-dechloronapyradiomycin A1	10.3390/md11062113	2013	NPA016530	Original	Metabolomic	Polyketides, Terpenoids	N/A
3-dechloro-3-brominapyradiomycin A1	10.3390/md11062113	2013	NPA005848	Variant	Metabolomic	Terpenoids	N/A
3-chloro-6,8-dihydroxy-8-α-lapachone	10.3390/md11062113	2013	NPA009724	Variant	Metabolomic	Polyketides	N/A
Separacene C	10.3390/md11082882	2013	NPA010515	Variant	Metabolomic	Fatty acids	N/A
Separacene A	10.3390/md11082882	2013	NPA012976	Variant	Metabolomic	Fatty acids	N/A
Separacene B	10.3390/md11082882	2013	NPA013546	Variant	Metabolomic	Fatty acids	N/A
Separacene D	10.3390/md11082882	2013	NPA017055	Variant	Metabolomic	Fatty acids	N/A
Champacyclin	10.3390/md11124834	2013	NPA016630	Variant	Metabolomic	Amino acids and Peptides	N/A
Halomadurone A	10.3390/md11125089	2013	NPA007122	Original	Metabolomic	Polyketides	N/A
Halomadurone B	10.3390/md11125089	2013	NPA004856	Variant	Metabolomic	Polyketides	N/A
Forazoline A	10.1002/anie.201405990	2014	NPA011767	Original	Metabolomic	Polyketides	N/A
Forazoline B	10.1002/anie.201405990	2014	NPA032338	Variant	Metabolomic	Polyketides	N/A
(4S)-4,8,10-trihydroxy-10-methyldodec-2-en-1,4-olide	10.1002/cbdv.201300321	2014	NPA002899	Variant	Metabolomic	Polyketides	N/A
(4S)-4,10-dihydroxydodec-2-en-1,4-olide	10.1002/cbdv.201300321	2014	NPA010710	Variant	Metabolomic		N/A
2-(6,7-Epoxy-12-hydroxy-1-oxo-2,4,10-farnesatrien-1-yl)pyrrole; (2Z,4E,6ξ,7ξ,10E)-form	10.1002/mrc.4031	2014	NPA031260	Variant	Metabolomic	Alkaloids	N/A
2-(6,7-Epoxy-12-hydroxy-1-oxo-2,4,10-farnesatrien-1-yl)pyrrole; (2Z,4E,6ξ,7ξ,10E)-form, 12-Aldehyde	10.1002/mrc.4031	2014	NPA031261	Variant	Metabolomic	Alkaloids	N/A
1,5-dihydroxy-3,4-dimethoxy-2-methylanthraquinone	10.1007/s10600-014-1036-3	2014	NPA004649	Variant	Metabolomic	Polyketides	N/A
Boseongazepine A	10.1016/j.bmcl.2014.02.022	2014	NPA003265	Variant	Metabolomic	Alkaloids	N/A
Boseongazepine C	10.1016/j.bmcl.2014.02.022	2014	NPA011433	Variant	Metabolomic	Alkaloids	N/A
Boseongazepine B	10.1016/j.bmcl.2014.02.022	2014	NPA013967	Variant	Metabolomic	Alkaloids	N/A
Spindomycin A	10.1016/j.bmcl.2014.09.026	2014	NPA005992	Original	Metabolomic	Alkaloids	N/A
Spindomycin B	10.1016/j.bmcl.2014.09.026	2014	NPA011047	Variant	Metabolomic	Alkaloids	N/A
8-(4'-O-methyl-α-ribopyranosyloxy)-2-methylquinoline	10.1016/j.tet.2014.03.005	2014	NPA010275	Original	Metabolomic	Alkaloids	N/A
9'-[2-amino-3-(4"-O-methyl-α-ribopyranosyloxy)phenyl]nonanoic acid	10.1016/j.tet.2014.03.005	2014	NPA018065	Original	Metabolomic		N/A
8-(4'-O-methyl-α-ribopyranosyloxy)-3,4-dihydroquinolin-2(1H)-one	10.1016/j.tet.2014.03.005	2014	NPA020146	Original	Metabolomic		N/A
8-(4'-O-methyl-α-rhamnopyranosyloxy)-2-methyquinoline	10.1016/j.tet.2014.03.005	2014	NPA005641	Variant	Metabolomic	Alkaloids	N/A
9′-(2-amino-3-(4′′-O-methyl-α-rhamnopyranosyloxy)phenyl)nonanoic acid	10.1016/j.tet.2014.03.005	2014	NPA008315	Variant	Metabolomic		N/A
11'-[2-amino-3-(4"-O-methyl-α-rhamnopyranosyloxy)phenyl]undecanoic acid	10.1016/j.tet.2014.03.005	2014	NPA014509	Variant	Metabolomic		N/A
11'-[2-amino-3-(4"-O-methyl-α-ribopyranosyloxy)phenyl]undecanoic acid	10.1016/j.tet.2014.03.005	2014	NPA016921	Variant	Metabolomic		N/A
8-(4'-O-methyl-α-rhamnopyranosyloxy)-3,4-dihydroquinolin-2(1H)-one	10.1016/j.tet.2014.03.005	2014	NPA020145	Variant	Metabolomic		N/A
Angumycinone B	10.1016/j.tetlet.2013.10.112	2014	NPA014554	Variant	Metabolomic	Polyketides	N/A
Angumycinone A	10.1016/j.tetlet.2013.10.112	2014	NPA016040	Variant	Metabolomic	Polyketides	N/A
Amycomycin C	10.1016/j.tetlet.2014.08.106	2014	NPA005483	Variant	Metabolomic	Polyketides	N/A
Amycomycin D	10.1016/j.tetlet.2014.08.106	2014	NPA008673	Variant	Metabolomic	Polyketides	N/A
Heronamide F	10.1021/np400665a	2014	NPA006236	Variant	Metabolomic	Amino acids and Peptides, Polyketides	N/A
Heronamide D	10.1021/np400665a	2014	NPA011575	Variant	Metabolomic	Amino acids and Peptides, Polyketides	N/A
Heronamide E	10.1021/np400665a	2014	NPA018373	Variant	Metabolomic	Amino acids and Peptides, Polyketides	N/A
Hypogeamicin B	10.1021/np400742p	2014	NPA002569	Variant	Metabolomic	Polyketides	N/A
Hypogeamicin D	10.1021/np400742p	2014	NPA006015	Variant	Metabolomic	Polyketides	N/A
Hypogeamicin A	10.1021/np400742p	2014	NPA007961	Variant	Metabolomic	Polyketides	N/A
Hypogeamicin C	10.1021/np400742p	2014	NPA008291	Variant	Metabolomic	Polyketides	N/A
Cystargamide	10.1021/np500122s	2014	NPA016054	Original	Metabolomic	Amino acids and Peptides, Polyketides	N/A
Anmindenol A	10.1021/np500285a	2014	NPA003054	Original	Metabolomic	Terpenoids	N/A
Anmindenol B	10.1021/np500285a	2014	NPA014022	Variant	Metabolomic	Terpenoids	N/A
Jiangrine B	10.1021/np500402a	2014	NPA009848	Original	Metabolomic	Alkaloids	N/A
Jiangolide	10.1021/np500402a	2014	NPA013829	Original	Metabolomic	Terpenoids	N/A
Jiangrine F	10.1021/np500402a	2014	NPA016191	Original	Metabolomic	Alkaloids	N/A
Jiangrine E	10.1021/np500402a	2014	NPA019537	Original	Metabolomic	Alkaloids	N/A
Jiangrine A	10.1021/np500402a	2014	NPA002949	Original	Metabolomic	Alkaloids	N/A
Jiangrine D	10.1021/np500402a	2014	NPA013068	Variant	Metabolomic	Alkaloids	N/A
Jiangrine C	10.1021/np500402a	2014	NPA005642	Variant	Metabolomic	Alkaloids	N/A
Lajollamycin D	10.1021/np500500t	2014	NPA002747	Variant	Metabolomic	Amino acids and Peptides, Polyketides	N/A
Lajollamycin B	10.1021/np500500t	2014	NPA010851	Variant	Metabolomic	Polyketides	N/A
Lajollamycin C	10.1021/np500500t	2014	NPA016348	Variant	Metabolomic	Amino acids and Peptides, Polyketides	N/A
Anithiactin A	10.1021/np500558b	2014	NPA001473	Variant	Metabolomic	Alkaloids	N/A
Anithiactin C	10.1021/np500558b	2014	NPA015438	Variant	Metabolomic	Alkaloids	N/A
Anithiactin B	10.1021/np500558b	2014	NPA004078	Variant	Metabolomic	Alkaloids	N/A
Nocatrione B	10.1021/np5006086	2014	NPA004675	Variant	Metabolomic	Polyketides	N/A
Nocatrione A	10.1021/np5006086	2014	NPA014210	Variant	Metabolomic	Polyketides	N/A
Borrelidin B	10.1021/np500727g	2014	NPA024610	Variant	Metabolomic	Polyketides	N/A
Ruthmycin	10.1021/ol4033418	2014	NPA000752	Variant	Metabolomic	Polyketides	N/A
Wollamide B	10.1021/ol502472c	2014	NPA003885	Variant	Metabolomic	Amino acids and Peptides	N/A
Desotamide E	10.1021/ol502472c	2014	NPA012726	Variant	Metabolomic	Amino acids and Peptides	N/A
Desotamide F	10.1021/ol502472c	2014	NPA018231	Variant	Metabolomic	Amino acids and Peptides	N/A
Wollamide A	10.1021/ol502472c	2014	NPA018690	Variant	Metabolomic	Amino acids and Peptides	N/A
3-hydroxy-6-dimethylallylindolin (DMAIN)-2-one	10.1038/ja.2013.116	2014	NPA004671	Original	Metabolomic	Alkaloids	N/A
Mangromicin A	10.1038/ja.2013.129	2014	NPA000353	Variant	Metabolomic	Polyketides	N/A
Mangromicin B	10.1038/ja.2013.129	2014	NPA010212	Variant	Metabolomic	Polyketides	N/A
RK-1355B	10.1038/ja.2013.144	2014	NPA001585	Variant	Metabolomic	Amino acids and Peptides, Polyketides	N/A
RK-1355A	10.1038/ja.2013.144	2014	NPA008341	Variant	Metabolomic	Amino acids and Peptides, Polyketides	N/A
Neomacquarimicin	10.1038/ja.2014.17	2014	NPA029841	Original	Metabolomic	Terpenoids	N/A
Mullinamide B	10.1038/ja.2014.37	2014	NPA005889	Variant	Metabolomic	Amino acids and Peptides	N/A
Mullinamide A	10.1038/ja.2014.37	2014	NPA010675	Variant	Metabolomic	Amino acids and Peptides	N/A
Not named	10.1038/ja.2014.8	2014	NPA006599	Variant	Metabolomic	Alkaloids, Terpenoids	N/A
Seriniquinone	10.1073/pnas.1410932111	2014	NPA015155	Original	Metabolomic	Polyketides	N/A
4-oxo-1,4-dihydroquinoline-3-carboxamide	10.1080/14786419.2013.858341	2014	NPA013653	Variant	Metabolomic	Alkaloids	N/A
Cyclo(L-Tyr-L-Pro-L-Phe-trans-4-hydroxy-L-Pro)	10.1080/14786419.2013.863198	2014	NPA001747	Variant	Metabolomic	Amino acids and Peptides	N/A
3-acetonylidene-7-prenylindolin-2-one	10.1080/14786419.2013.871546	2014	NPA015168	Original	Metabolomic	Alkaloids	N/A
FW054-1	10.1080/14786419.2014.926350	2014	NPA010925	Original	Metabolomic		N/A
3-[2-[2-hydroxy-3-methylphenyl-5-(hydroxymethyl)]-2-oxoethyl]glutarimide	10.1080/14786419.2014.928877	2014	NPA020172	Variant	Metabolomic	Alkaloids	N/A
Not named (17-hydroxy-glaciapyrrole B)	10.1177/1934578X1400900402	2014	NPA031417	Variant	Metabolomic	Alkaloids	N/A
2-(furan-2-yl)-5-(2S,3S,4-trihydroxybutyl)pyrazine	10.3390/md12010477	2014	NPA032478	Original	Metabolomic	Alkaloids, Amino acids and Peptides	N/A
(S)-4-benzyl-3-oxo-3,4-dihydro-1H-pyrrolo[2,1-c] [1,4]oxazine-6-carbaldehyde	10.3390/md12010477	2014	NPA032482	Original	Metabolomic	Shikimates and Phenylpropanoids	N/A
2-(furan-2-yl)-6-(2S,3S,4-trihydroxybutyl)pyrazine	10.3390/md12010477	2014	NPA015653	Variant	Metabolomic	Alkaloids, Amino acids and Peptides	N/A
(S)-4-isobutyl-3-oxo-3,4-dihydro-1H-pyrrolo[2,1-c][1,4]oxazine-6-carbaldehyde	10.3390/md12010477	2014	NPA032479	Variant	Metabolomic	Alkaloids	N/A
(S)-4-isopropyl-3-oxo-3,4-dihydro-1H-pyrrolo[2,1-c][1,4]oxazine-6-carbaldehyde	10.3390/md12010477	2014	NPA032480	Variant	Metabolomic	Alkaloids	N/A
(4S)-4-(2-methylbutyl)-3-oxo-3,4-dihydro-1H-pyrrolo[2,1-c][1,4]oxazine-6-carbaldehyde	10.3390/md12010477	2014	NPA032481	Variant	Metabolomic	Alkaloids	N/A
Not named	10.3390/md12020999	2014	NPA006145	Original	Metabolomic	Carbohydrates	N/A
Butremycin	10.3390/md12020999	2014	NPA017854	Variant	Metabolomic	Amino acids and Peptides, Polyketides	N/A
Amycolactam	10.3390/md12042326	2014	NPA017712	Original	Metabolomic	Alkaloids, Amino acids and Peptides	N/A
Amycocyclopiazonic acid	10.3390/md12042326	2014	NPA001500	Variant	Metabolomic	Alkaloids, Amino acids and Peptides	N/A
Amycofuran	10.3390/md12042326	2014	NPA015642	Variant	Metabolomic	Polyketides	N/A
Arcticoside	10.3390/md12052526	2014	NPA002968	Original	Metabolomic		N/A
C-1027 chromophore-V	10.3390/md12052526	2014	NPA002269	Variant	Metabolomic		N/A
Nocapyrone R	10.3390/md12074110	2014	NPA019227	Variant	Metabolomic	Polyketides	N/A
(10R)-nocapyrone L	10.3390/md12074110	2014	NPA032495	Variant	Metabolomic	Polyketides	N/A
(10S)-nocapyrone L	10.3390/md12074110	2014	NPA032496	Variant	Metabolomic	Polyketides	N/A
Butrepyrazinone	10.3390/md12105197	2014	NPA010788	Variant	Metabolomic	Alkaloids, Amino acids and Peptides	N/A
Legonmycin A	10.1002/anie.201502902	2015	NPA007477	Original	Metabolomic	Alkaloids	N/A
Legonmycin B	10.1002/anie.201502902	2015	NPA032572	Variant	Metabolomic	Alkaloids	N/A
(2Z,4E,9E)-6,7,11-trihydroxy-3,7,11-trimethyl-1-(1H-pyrrol-2-yl)dodeca-2,4,9-trien-1-one	10.1002/cbdv.201400001	2015	NPA001957	Variant	Metabolomic	Alkaloids	N/A
(2Z,4E)-5-{3-[(2E)-4-hydroxy-4-methylpent-2-en-1-yl]-3-methyloxiran-2-yl}-3-methyl-1-(1H-pyrrol-2-yl)penta-2,4-dien-1-one	10.1002/cbdv.201400001	2015	NPA008741	Variant	Metabolomic		N/A
Coeligiosin A	10.1002/chem.201405733	2015	NPA000354	Original	Metabolomic	Alkaloids	N/A
Coeligiosin B	10.1002/chem.201405733	2015	NPA007694	Variant	Metabolomic	Alkaloids	N/A
4β,5α-dihydroxy-2,5β-dimethylcyclohex-2-enone	10.1007/s10600-015-1495-1	2015	NPA010555	Variant	Metabolomic		N/A
4α,5α-dihydroxy-2,5β-dimethylcyclohex-2-enone	10.1007/s10600-015-1495-1	2015	NPA013118	Variant	Metabolomic		N/A
Dietziamide A	10.1016/j.bmcl.2015.07.035	2015	NPA002982	Original	Metabolomic	Alkaloids	N/A
Dietziamide B	10.1016/j.bmcl.2015.07.035	2015	NPA020141	Variant	Metabolomic	Alkaloids	N/A
Pontemazine A	10.1016/j.bmcl.2015.10.019	2015	NPA020241	Variant	Metabolomic	Alkaloids	N/A
Pontemazine B	10.1016/j.bmcl.2015.10.019	2015	NPA020242	Variant	Metabolomic	Alkaloids	N/A
Streptomonomicin	10.1016/j.chembiol.2014.11.017	2015	NPA003689	Variant	Metabolomic	Amino acids and Peptides	N/A
Salternamide B	10.1021/acs.jnatprod.5b00002	2015	NPA000718	Variant	Metabolomic	Polyketides	N/A
Salternamide C	10.1021/acs.jnatprod.5b00002	2015	NPA009331	Variant	Metabolomic	Polyketides	N/A
Salternamide D	10.1021/acs.jnatprod.5b00002	2015	NPA014903	Variant	Metabolomic	Polyketides	N/A
Salternamide A	10.1021/acs.jnatprod.5b00002	2015	NPA032414	Variant	Metabolomic	Polyketides	N/A
L-digitoxosyl-phenanthroviridin	10.1021/acs.jnatprod.5b00277	2015	NPA016900	Variant	Metabolomic	Polyketides	N/A
Suncheonoside A	10.1021/acs.jnatprod.5b00284	2015	NPA012824	Original	Metabolomic	Polyketides	N/A
Suncheonoside C	10.1021/acs.jnatprod.5b00284	2015	NPA018319	Variant	Metabolomic	Polyketides	N/A
Suncheonoside B	10.1021/acs.jnatprod.5b00284	2015	NPA012758	Variant	Metabolomic	Polyketides	N/A
Suncheonoside D	10.1021/acs.jnatprod.5b00284	2015	NPA016653	Variant	Metabolomic	Polyketides	N/A
AT2433-B3	10.1021/acs.jnatprod.5b00429	2015	NPA000927	Variant	Metabolomic	Alkaloids	N/A
AT2433-A4	10.1021/acs.jnatprod.5b00429	2015	NPA004942	Variant	Metabolomic	Alkaloids	N/A
AT2433-A5	10.1021/acs.jnatprod.5b00429	2015	NPA007452	Variant	Metabolomic	Alkaloids	N/A
AT2433-A3	10.1021/acs.jnatprod.5b00429	2015	NPA018454	Variant	Metabolomic	Alkaloids	N/A
Arthroamide	10.1021/acs.jnatprod.5b00540	2015	NPA015266	Variant	Metabolomic	Amino acids and Peptides, Polyketides	N/A
Not named	10.1021/acs.jnatprod.5b00601	2015	NPA002139	Variant	Metabolomic	Polyketides	N/A
Not named	10.1021/acs.jnatprod.5b00601	2015	NPA003683	Variant	Metabolomic	Polyketides	N/A
Not named	10.1021/acs.jnatprod.5b00601	2015	NPA003844	Variant	Metabolomic	Polyketides	N/A
Not named	10.1021/acs.jnatprod.5b00601	2015	NPA003981	Variant	Metabolomic	Polyketides	N/A
Not named	10.1021/acs.jnatprod.5b00601	2015	NPA004121	Variant	Metabolomic	Polyketides	N/A
8-O-methyltetrangomycin	10.1021/acs.jnatprod.5b00601	2015	NPA004287	Variant	Metabolomic	Polyketides	N/A
Not named	10.1021/acs.jnatprod.5b00601	2015	NPA004629	Variant	Metabolomic	Polyketides	N/A
12-deoxo-12-hydroxy-8-O-methyltetrangomycin	10.1021/acs.jnatprod.5b00601	2015	NPA008532	Variant	Metabolomic	Polyketides	N/A
Not named	10.1021/acs.jnatprod.5b00601	2015	NPA012660	Variant	Metabolomic	Polyketides	N/A
Tetrangomycin	10.1021/acs.jnatprod.5b00601	2015	NPA012713	Variant	Metabolomic	Polyketides	N/A
Not named	10.1021/acs.jnatprod.5b00601	2015	NPA014613	Variant	Metabolomic	Polyketides	N/A
Bacaryolane A	10.1021/acs.jnatprod.5b00674	2015	NPA029911	Variant	Metabolomic	Terpenoids	N/A
Bacaryolane B	10.1021/acs.jnatprod.5b00674	2015	NPA029912	Variant	Metabolomic	Terpenoids	N/A
Nocarimidazole A	10.1021/acs.jnatprod.5b00746	2015	NPA004463	Original	Metabolomic	Alkaloids	N/A
Nocarimidazole B	10.1021/acs.jnatprod.5b00746	2015	NPA009400	Variant	Metabolomic	Alkaloids	N/A
Eudistamide A	10.1021/acs.joc.5b01486	2015	NPA029914	Original	Metabolomic	Amino acids and Peptides, Polyketides	N/A
Eudistamide B	10.1021/acs.joc.5b01486	2015	NPA029915	Variant	Metabolomic	Amino acids and Peptides, Polyketides	N/A
5-isoprenylindole-3-carboxylate beta-D-glycosyl ester	10.1021/acs.orglett.5b01203	2015	NPA002910	Variant	Metabolomic	Alkaloids	N/A
Terfestatin B	10.1021/acs.orglett.5b01203	2015	NPA003554	Variant	Metabolomic	Shikimates and Phenylpropanoids	N/A
Terfestatin C	10.1021/acs.orglett.5b01203	2015	NPA004619	Variant	Metabolomic	Shikimates and Phenylpropanoids	N/A
Spithioneine A	10.1021/acs.orglett.5b01328	2015	NPA029916	Original	Metabolomic	Alkaloids	N/A
Spithioneine B	10.1021/acs.orglett.5b01328	2015	NPA029917	Variant	Metabolomic	Alkaloids	N/A
Ulleungamide A	10.1021/acs.orglett.5b01969	2015	NPA020265	Original	Metabolomic	Amino acids and Peptides, Polyketides	N/A
Ulleungamide B	10.1021/acs.orglett.5b01969	2015	NPA020266	Variant	Metabolomic	Amino acids and Peptides, Polyketides	N/A
Salinazinone B	10.1021/acs.orglett.5b02495	2015	NPA010636	Variant	Metabolomic	Alkaloids	N/A
Azoxymycin A	10.1021/acs.orglett.5b03137	2015	NPA020159	Original	Metabolomic	Alkaloids	N/A
Azoxymycin B	10.1021/acs.orglett.5b03137	2015	NPA020160	Variant	Metabolomic	Alkaloids	N/A
Azoxymycin C	10.1021/acs.orglett.5b03137	2015	NPA014124	Variant	Metabolomic	Alkaloids	N/A
Buanquinone	10.1021/np500736b	2015	NPA004276	Variant	Metabolomic	Polyketides	N/A
Buanmycin	10.1021/np500736b	2015	NPA015328	Variant	Metabolomic	Polyketides	N/A
Cystargolide A	10.1021/np501060k	2015	NPA004240	Original	Metabolomic	Amino acids and Peptides	N/A
Cystargolide B	10.1021/np501060k	2015	NPA019521	Variant	Metabolomic	Amino acids and Peptides	N/A
Actinoallolide A	10.1021/ol5037216	2015	NPA009490	Original	Metabolomic	Polyketides	N/A
Actinoallolide B	10.1021/ol5037216	2015	NPA018165	Variant	Metabolomic	Polyketides	N/A
Actinoallolide E	10.1021/ol5037216	2015	NPA003378	Variant	Metabolomic	Polyketides	N/A
Actinoallolide D	10.1021/ol5037216	2015	NPA011252	Variant	Metabolomic	Polyketides	N/A
Actinoallolide C	10.1021/ol5037216	2015	NPA014396	Variant	Metabolomic	Polyketides	N/A
Barceloneic acid C	10.1038/ja.2014.116	2015	NPA017590	Variant	Metabolomic	Polyketides	N/A
Albaflavenol B	10.1038/ja.2014.138	2015	NPA031355	Variant	Metabolomic	Terpenoids	N/A
RK-270B	10.1038/ja.2014.141	2015	NPA031357	Original	Metabolomic	Alkaloids	N/A
RK-270A	10.1038/ja.2014.141	2015	NPA031356	Variant	Metabolomic	Alkaloids	N/A
RK-270C	10.1038/ja.2014.141	2015	NPA031358	Variant	Metabolomic	Alkaloids	N/A
Dandamycin	10.1038/ja.2015.10	2015	NPA005836	Original	Metabolomic	Alkaloids	N/A
Chromomycin A5	10.1039/c4ra16517a	2015	NPA029966	Variant	Metabolomic	Polyketides	N/A
Saccharothriolide A	10.1039/c5cc01953b	2015	NPA009897	Original	Metabolomic	Polyketides	N/A
Saccharothriolide C	10.1039/c5cc01953b	2015	NPA015256	Variant	Metabolomic	Polyketides	N/A
Saccharothriolide B	10.1039/c5cc01953b	2015	NPA013910	Variant	Metabolomic	Polyketides	N/A
Actinotetraose L	10.1080/10286020.2015.1052413	2015	NPA018339	Variant	Metabolomic	Terpenoids	N/A
2-amino-3,4-dihydroxy-5-methoxybenzamide	10.1080/14786419.2014.945174	2015	NPA013555	Original	Metabolomic	Alkaloids	N/A
Dimethyldehydrorabelomycin	10.3390/md13084682	2015	NPA016918	Variant	Metabolomic	Polyketides	N/A
Monacyclinone D	10.3390/md13084682	2015	NPA005520	Variant	Metabolomic	Polyketides	N/A
Monacyclinone A	10.3390/md13084682	2015	NPA007027	Variant	Metabolomic	Polyketides	N/A
Monacyclinone C	10.3390/md13084682	2015	NPA014745	Variant	Metabolomic	Polyketides	N/A
Monacyclinone B	10.3390/md13084682	2015	NPA015202	Variant	Metabolomic	Polyketides	N/A
Monacyclinone E	10.3390/md13084682	2015	NPA017021	Variant	Metabolomic	Polyketides	N/A
Frigocyclinone	10.3390/md13084682	2015	NPA032508	Variant	Metabolomic	Polyketides	N/A
Hormaomycin C	10.3390/md13085187	2015	NPA007978	Variant	Metabolomic	Amino acids and Peptides, Polyketides	N/A
Hormaomycin B	10.3390/md13085187	2015	NPA018697	Variant	Metabolomic	Amino acids and Peptides, Polyketides	N/A
Cyclo-(L-Pro-4-OH-L-Leu)	10.3390/md13116947	2015	NPA010174	Variant	Metabolomic	Amino acids and Peptides	N/A
Quinomycin G	10.3390/md13116947	2015	NPA012441	Variant	Metabolomic	Alkaloids, Amino acids and Peptides	N/A
Ambobactin	10.3390/molecules200916278	2015	NPA020258	Variant	Metabolomic	Amino acids and Peptides, Polyketides	N/A
Methyl 2-(cyclohex-2-en-1-yl)acetate	10.1002/cbic.201600388	2016	NPA024425	Original	Metabolomic		N/A
Methyl cyclohex-2-ene-1-carboxylate	10.1002/cbic.201600388	2016	NPA024426	Original	Metabolomic		N/A
Cyclohex-2-enylmethanol	10.1002/cbic.201600388	2016	NPA024427	Original	Metabolomic		N/A
Methyl (Z)-2-(cyclohex-2-en-1-ylidene)acetate	10.1002/cbic.201600388	2016	NPA024423	Variant	Metabolomic		N/A
Methyl (E)-2-(cyclohex-2-en-1-ylidene)acetate	10.1002/cbic.201600388	2016	NPA024424	Variant	Metabolomic		N/A
Phosdiecin A	10.1002/hlca.201500038	2016	NPA030054	Variant	Metabolomic	Polyketides	N/A
Phosdiecin B	10.1002/hlca.201500038	2016	NPA030055	Variant	Metabolomic	Polyketides	N/A
(2E,6R*,7R*,10R*)-7,10-Epoxy-2-farnesene-1,6,11-triol	10.1002/mrc.4409	2016	NPA031262	Variant	Metabolomic	Terpenoids	N/A
(2E,6R*,7R*,10R*)-6,10-Epoxy-2-farnesene-1,7,11-triol	10.1002/mrc.4409	2016	NPA031263	Variant	Metabolomic	Terpenoids	N/A
15-Hydroxy-(+)-epicubenol	10.1002/mrc.4473	2016	NPA031264	Variant	Metabolomic	Terpenoids	N/A
(7β)-3-Eudesmene-7,11-diol (7b-hydroxy-7-epi-a-eudesmol))	10.1002/mrc.4473	2016	NPA031265	Variant	Metabolomic	Terpenoids	N/A
Not named	10.1016/j.bse.2016.06.004	2016	NPA031476	Original	Metabolomic		N/A
Marinopyrone C	10.1016/j.tetlet.2016.03.084	2016	NPA000608	Variant	Metabolomic	Polyketides	N/A
Marinopyrone B	10.1016/j.tetlet.2016.03.084	2016	NPA004407	Variant	Metabolomic	Polyketides	N/A
Marinopyrone D	10.1016/j.tetlet.2016.03.084	2016	NPA008994	Variant	Metabolomic	Polyketides	N/A
Marinopyrone A	10.1016/j.tetlet.2016.03.084	2016	NPA009325	Variant	Metabolomic	Polyketides	N/A
Iminimycin B	10.1016/j.tetlet.2016.06.040	2016	NPA007775	Original	Metabolomic	Alkaloids	N/A
Naseseazine C	10.1016/j.tetlet.2016.11.071	2016	NPA008122	Variant	Metabolomic	Amino acids and Peptides	N/A
Chloroxaloterpin A	10.1021/acs.jafc.6b03645	2016	NPA031305	Variant	Metabolomic	Terpenoids	N/A
Chloroxaloterpin B	10.1021/acs.jafc.6b03645	2016	NPA031306	Variant	Metabolomic	Terpenoids	N/A
Spinoxazine B	10.1021/acs.jnatprod.5b00604	2016	NPA021870	Variant	Metabolomic	Alkaloids	N/A
Spinoxazine A	10.1021/acs.jnatprod.5b00604	2016	NPA021871	Variant	Metabolomic	Alkaloids	N/A
Nahuoic acid B	10.1021/acs.jnatprod.5b00805	2016	NPA021816	Variant	Metabolomic	Polyketides	N/A
Nahuoic acid C	10.1021/acs.jnatprod.5b00805	2016	NPA021817	Variant	Metabolomic	Polyketides	N/A
Nahuoic acid D	10.1021/acs.jnatprod.5b00805	2016	NPA021818	Variant	Metabolomic	Polyketides	N/A
Nahuoic acid E	10.1021/acs.jnatprod.5b00805	2016	NPA021819	Variant	Metabolomic	Polyketides	N/A
(1β,4β,4aβ,8aα)-4,8a-dimethyloctahydronaphthalene-1,4a(2H)-diol	10.1021/acs.jnatprod.5b00827	2016	NPA021912	Variant	Metabolomic	Terpenoids	N/A
(1β,4β,4aβ,7α,8aα)-4,8a-dimethyloctahydronaphthalene-1,4a,7(2H)-triol	10.1021/acs.jnatprod.5b00827	2016	NPA021913	Variant	Metabolomic	Terpenoids	N/A
19-methoxybafilomycin C1 amide	10.1021/acs.jnatprod.5b00827	2016	NPA021914	Variant	Metabolomic	Polyketides	N/A
21-deoxybafilomycin A1	10.1021/acs.jnatprod.5b00827	2016	NPA021915	Variant	Metabolomic	Polyketides	N/A
21-deoxybafilomycin A2	10.1021/acs.jnatprod.5b00827	2016	NPA021916	Variant	Metabolomic	Polyketides	N/A
Mohangic acid A	10.1021/acs.jnatprod.5b00956	2016	NPA021846	Variant	Metabolomic	Polyketides	N/A
Mohangic acid B	10.1021/acs.jnatprod.5b00956	2016	NPA021847	Variant	Metabolomic	Polyketides	N/A
Mohangic acid C	10.1021/acs.jnatprod.5b00956	2016	NPA021848	Variant	Metabolomic	Polyketides	N/A
Mohangic acid D	10.1021/acs.jnatprod.5b00956	2016	NPA021849	Variant	Metabolomic	Polyketides	N/A
Mohangic acid E	10.1021/acs.jnatprod.5b00956	2016	NPA021850	Variant	Metabolomic	Polyketides	N/A
Griseusrazin A	10.1021/acs.jnatprod.6b00009	2016	NPA021903	Original	Metabolomic	Alkaloids, Amino acids and Peptides	N/A
4-deoxyphomapyrone C	10.1021/acs.jnatprod.6b00175	2016	NPA030114	Original	Metabolomic	Polyketides	N/A
4-deoxy-11-hydroxyphomapyrone C	10.1021/acs.jnatprod.6b00175	2016	NPA030116	Variant	Metabolomic	Polyketides	N/A
4-deoxy-11-methylphomapyrone C	10.1021/acs.jnatprod.6b00175	2016	NPA030115	Variant	Metabolomic	Polyketides	N/A
(−)-4-deoxy-8R-hydroxyphomapyrone C	10.1021/acs.jnatprod.6b00175	2016	NPA030117	Variant	Metabolomic	Polyketides	N/A
(−)-4-deoxy-8S-hydroxyphomapyrone C	10.1021/acs.jnatprod.6b00175	2016	NPA030118	Variant	Metabolomic	Polyketides	N/A
4-deoxy-7-hydroxyphomapyrone C	10.1021/acs.jnatprod.6b00175	2016	NPA030119	Variant	Metabolomic	Polyketides	N/A
10-hydroxymucidone	10.1021/acs.jnatprod.6b00175	2016	NPA030120	Variant	Metabolomic	Polyketides	N/A
Germicidin H	10.1021/acs.jnatprod.6b00175	2016	NPA030121	Variant	Metabolomic	Polyketides	N/A
4-hydroxymucidone	10.1021/acs.jnatprod.6b00175	2016	NPA030122	Variant	Metabolomic	Polyketides	N/A
7R-hydroxymucidone	10.1021/acs.jnatprod.6b00175	2016	NPA030123	Variant	Metabolomic	Polyketides	N/A
Aldgamycin J	10.1021/acs.jnatprod.6b00200	2016	NPA022048	Variant	Metabolomic	Polyketides	N/A
Aldgamycin K	10.1021/acs.jnatprod.6b00200	2016	NPA022049	Variant	Metabolomic	Polyketides	N/A
Aldgamycin L	10.1021/acs.jnatprod.6b00200	2016	NPA022050	Variant	Metabolomic	Polyketides	N/A
Aldgamycin M	10.1021/acs.jnatprod.6b00200	2016	NPA022051	Variant	Metabolomic	Polyketides	N/A
Aldgamycin N	10.1021/acs.jnatprod.6b00200	2016	NPA022052	Variant	Metabolomic	Polyketides	N/A
Aldgamycin O	10.1021/acs.jnatprod.6b00200	2016	NPA022053	Variant	Metabolomic	Polyketides	N/A
Termisoflavone A	10.1021/acs.jnatprod.6b00738	2016	NPA022103	Variant	Metabolomic	Shikimates and Phenylpropanoids	N/A
Termisoflavone B	10.1021/acs.jnatprod.6b00738	2016	NPA022104	Variant	Metabolomic	Shikimates and Phenylpropanoids	N/A
Termisoflavone C	10.1021/acs.jnatprod.6b00738	2016	NPA022105	Variant	Metabolomic	Shikimates and Phenylpropanoids	N/A
Rubrulone B	10.1021/acs.orglett.6b00074	2016	NPA023798	Original	Metabolomic	Polyketides	N/A
Coprisidin A	10.1021/acs.orglett.6b02555	2016	NPA009678	Original	Metabolomic	Polyketides	N/A
Coprisidin B	10.1021/acs.orglett.6b02555	2016	NPA001587	Variant	Metabolomic	Polyketides	N/A
Deimino-antipain	10.1021/jacs.6b06848	2016	NPA022822	Variant	Metabolomic	Amino acids and Peptides	N/A
Unantimycin A	10.1038/ja.2015.124	2016	NPA021497	Variant	Metabolomic	Amino acids and Peptides, Polyketides	N/A
Amethysione	10.1038/ja.2015.128	2016	NPA021502	Original	Metabolomic	Alkaloids	N/A
Amethysamide	10.1038/ja.2015.128	2016	NPA021501	Variant	Metabolomic	Alkaloids	N/A
Aotaphenazine	10.1038/ja.2015.129	2016	NPA021498	Variant	Metabolomic	Alkaloids	N/A
5,10-dihydrophencomycin	10.1038/ja.2015.129	2016	NPA021499	Variant	Metabolomic	Alkaloids	N/A
Iminimycin A	10.1038/ja.2015.142	2016	NPA021512	Original	Metabolomic	Alkaloids	N/A
Not named	10.1038/ja.2015.99	2016	NPA021469	Variant	Metabolomic	Polyketides	N/A
Sagamilactam	10.1038/ja.2016.28	2016	NPA021536	Original	Metabolomic	Amino acids and Peptides, Polyketides	N/A
Hangtaimycin	10.1038/ja.2016.29	2016	NPA021537	Original	Metabolomic	Amino acids and Peptides, Polyketides	N/A
Actinoquinoline A	10.1038/ja.2016.56	2016	NPA021509	Original	Metabolomic	Alkaloids	N/A
Actinoquinoline B	10.1038/ja.2016.56	2016	NPA021510	Variant	Metabolomic	Alkaloids	N/A
Wailupemycin H	10.1038/srep20004	2016	NPA030139	Original	Metabolomic	Shikimates and Phenylpropanoids	N/A
Wailupemycin I	10.1038/srep20004	2016	NPA030140	Variant	Metabolomic	Shikimates and Phenylpropanoids	N/A
(+)-Intermedeol	10.1039/c5ob01998b	2016	NPA031374	Variant	Metabolomic	Terpenoids	N/A
Neomeranol B	10.1039/c5ob01998b	2016	NPA031376	Variant	Metabolomic	Terpenoids	N/A
(+)-isodauc-8-en-11-OL	10.1039/c5ob01998b	2016	NPA031375	Variant	Metabolomic	Terpenoids	N/A
Azolemycin A	10.1039/c5sc03021h	2016	NPA007457	Original	Metabolomic	Amino acids and Peptides	N/A
Azolemycin C	10.1039/c5sc03021h	2016	NPA014192	Variant	Metabolomic	Amino acids and Peptides	N/A
Azolemycin B	10.1039/c5sc03021h	2016	NPA002151	Variant	Metabolomic	Amino acids and Peptides	N/A
Azolemycin D	10.1039/c5sc03021h	2016	NPA012770	Variant	Metabolomic	Amino acids and Peptides	N/A
Brevibactin B	10.1080/14786419.2015.1026340	2016	NPA032472	Original	Metabolomic	Alkaloids, Amino acids and Peptides	N/A
Brevibactin C	10.1080/14786419.2015.1026340	2016	NPA032473	Variant	Metabolomic	Alkaloids, Amino acids and Peptides	N/A
Cyclic-(Tyr-Ala-Leu-Ser)	10.1080/14786419.2015.1026340	2016	NPA004111	Variant	Metabolomic	Amino acids and Peptides	N/A
(6R,3Z)-3-benzylidene-6-isobutyl-1-methylpiperazine-2,5-dione	10.1080/14786419.2015.1045509	2016	NPA018566	Original	Metabolomic	Alkaloids, Amino acids and Peptides	N/A
Curvularin-7-O-β-D-glucopyranoside	10.1080/14786419.2015.1047775	2016	NPA002180	Original	Metabolomic	Polyketides	N/A
4- {[tricycle(3.2.1.11,3)non-8-yl] methoxy carbonyl benzene-1,3-dicarboxylic acid} (2,4,5,6,7, 8, 9 heptaoxa, 3-ethoxy, 5,6,7,9-tetramethyl unidecane)	10.1080/14786419.2015.1081199	2016	NPA005372	Original	Metabolomic	Terpenoids	N/A
Lucentide B	10.1080/14786419.2015.1104674	2016	NPA000534	Original	Metabolomic	Polyketides	N/A
Lucentide A	10.1080/14786419.2015.1104674	2016	NPA011508	Original	Metabolomic	Polyketides	N/A
Vineomycin B2	10.1080/14786419.2015.1120730	2016	NPA010401	Variant	Metabolomic	Polyketides	N/A
Vineomycin A1	10.1080/14786419.2015.1120730	2016	NPA017848	Variant	Metabolomic	Polyketides	N/A
3-(1,3-benzodioxol-5-ylmethyl)-6-isopropyl-2,5-diketopiperazine	10.1080/14786419.2015.1137570	2016	NPA010704	Original	Metabolomic	Alkaloids, Amino acids and Peptides	N/A
3-((1,3-benzodioxol-5-yl)methyl)-6-isobutyl-2,5-diketopiperazine	10.1080/14786419.2015.1137570	2016	NPA007139	Variant	Metabolomic	Alkaloids, Amino acids and Peptides	N/A
3-(3-hydroxy-4-methoxybenzyl)-6-isobutyl-2,5-diketopiperazine	10.1080/14786419.2015.1137570	2016	NPA007159	Variant	Metabolomic	Alkaloids, Amino acids and Peptides	N/A
Streptomyceamide C	10.1080/14786419.2016.1201668	2016	NPA000733	Variant	Metabolomic	Amino acids and Peptides	N/A
6-hydroxyisatin	10.1515/znb-2016-0143	2016	NPA030219	Variant	Metabolomic	Alkaloids	N/A
6-hydroxy-5-methoxyisatin	10.1515/znb-2016-0143	2016	NPA030220	Variant	Metabolomic	Alkaloids	N/A
N-acetyl-N-demethylmayamycin	10.3390/md14010010	2016	NPA023051	Variant	Metabolomic	Polyketides	N/A
Streptoanthraquinone A	10.3390/md14010010	2016	NPA023052	Variant	Metabolomic	Polyketides	N/A
Ananstrep A	10.3390/md14050084	2016	NPA004359	Variant	Metabolomic	Terpenoids	N/A
Ananstrep B	10.3390/md14050084	2016	NPA007285	Variant	Metabolomic	Terpenoids	N/A
Ananstrep C	10.3390/md14050084	2016	NPA018408	Variant	Metabolomic	Terpenoids	N/A
3-amino-5-hydroxy-benzoic acid	10.4067/s0718-19572016000100015	2016	NPA030274	Variant	Metabolomic	Amino acids and Peptides	N/A
(Z)-hexadec-3-enenitrile	10.1002/anie.201611940	2017	NPA024377	Original	Metabolomic	Fatty acids	N/A
(Z)-12-methyltridec-3-enenitrile	10.1002/anie.201611940	2017	NPA024367	Variant	Metabolomic	Fatty acids	N/A
(E)-12-methyltridec-3-enenitrile	10.1002/anie.201611940	2017	NPA024368	Variant	Metabolomic	Fatty acids	N/A
(Z)-tetradec-3-enenitrile	10.1002/anie.201611940	2017	NPA024369	Variant	Metabolomic	Fatty acids	N/A
(E)-tetradec-3-enenitrile	10.1002/anie.201611940	2017	NPA024370	Variant	Metabolomic	Fatty acids	N/A
(Z)-13-methyltetradec-3-enenitrile	10.1002/anie.201611940	2017	NPA024371	Variant	Metabolomic	Fatty acids	N/A
(Z)-12-methyltetradec-3-enenitrile	10.1002/anie.201611940	2017	NPA024372	Variant	Metabolomic	Fatty acids	N/A
(E)-13-methyltetradec-3-enenitrile	10.1002/anie.201611940	2017	NPA024373	Variant	Metabolomic	Fatty acids	N/A
13-methyltetradecanenitrile	10.1002/anie.201611940	2017	NPA024374	Variant	Metabolomic	Fatty acids	N/A
(Z)-pentadec-3-enenitrile	10.1002/anie.201611940	2017	NPA024375	Variant	Metabolomic	Fatty acids	N/A
(Z)-14-methylpentadec-3-enenitrile	10.1002/anie.201611940	2017	NPA024376	Variant	Metabolomic	Fatty acids	N/A
Geldanamycin D	10.1002/anie.201612447	2017	NPA024349	Variant	Metabolomic	Polyketides	N/A
Mccrearamycin B	10.1002/anie.201612447	2017	NPA024350	Variant	Metabolomic	Polyketides	N/A
Geldanamycin B	10.1002/anie.201612447	2017	NPA024351	Variant	Metabolomic	Polyketides	N/A
Geldanamycin C	10.1002/anie.201612447	2017	NPA024352	Variant	Metabolomic	Polyketides	N/A
Geldanamycin E	10.1002/anie.201612447	2017	NPA024353	Variant	Metabolomic	Polyketides	N/A
Geldanamycin F	10.1002/anie.201612447	2017	NPA024354	Variant	Metabolomic	Polyketides	N/A
Geldanamycin G	10.1002/anie.201612447	2017	NPA024355	Variant	Metabolomic	Polyketides	N/A
Mccrearamycin A	10.1002/anie.201612447	2017	NPA024356	Variant	Metabolomic	Polyketides	N/A
Mccrearamycin C	10.1002/anie.201612447	2017	NPA024357	Variant	Metabolomic	Polyketides	N/A
Mccrearamycin D	10.1002/anie.201612447	2017	NPA024358	Variant	Metabolomic	Polyketides	N/A
Nocarazepine A	10.1007/s10600-017-1983-6	2017	NPA030341	Original	Metabolomic	Amino acids and Peptides	N/A
Sharkquinone	10.1007/s11418-017-1086-5	2017	NPA030344	Variant	Metabolomic	Polyketides	N/A
BC 01_C1	10.1007/s13205-016-0581-9	2017	NPA030348	Original	Metabolomic		N/A
BC 01_C2	10.1007/s13205-016-0581-9	2017	NPA030349	Original	Metabolomic	Terpenoids	N/A
BC 01_C3	10.1007/s13205-016-0581-9	2017	NPA030350	Original	Metabolomic	Polyketides	N/A
6,12-Dihydroxy-1,4-eudesmadien-3-one	10.1016/j.bmcl.2017.03.075	2017	NPA031300	Variant	Metabolomic	Terpenoids	N/A
Streptopertusacin A	10.1016/j.phytochem.2017.09.010	2017	NPA023631	Original	Metabolomic	Alkaloids	N/A
21,22-en-9-hydroxybafilomycin D	10.1016/j.phytochem.2017.09.010	2017	NPA023630	Variant	Metabolomic	Polyketides	N/A
21,22-en-bafilomycin D	10.1016/j.phytochem.2017.09.010	2017	NPA023632	Variant	Metabolomic	Polyketides	N/A
Enduspeptide A	10.1016/j.tet.2016.12.033	2017	NPA022844	Variant	Metabolomic	Amino acids and Peptides, Polyketides	N/A
Enduspeptide B	10.1016/j.tet.2016.12.033	2017	NPA022845	Variant	Metabolomic	Amino acids and Peptides, Polyketides	N/A
Enduspeptide C	10.1016/j.tet.2016.12.033	2017	NPA022846	Variant	Metabolomic	Amino acids and Peptides, Polyketides	N/A
Enduspeptide D	10.1016/j.tet.2016.12.033	2017	NPA022847	Variant	Metabolomic	Amino acids and Peptides, Polyketides	N/A
Enduspeptide E	10.1016/j.tet.2016.12.033	2017	NPA022848	Variant	Metabolomic	Amino acids and Peptides, Polyketides	N/A
Enduspeptide F	10.1016/j.tet.2016.12.033	2017	NPA022849	Variant	Metabolomic	Amino acids and Peptides, Polyketides	N/A
Nenestatin A	10.1016/j.tet.2017.03.054	2017	NPA022891	Original	Metabolomic	Polyketides	N/A
(4Z)-12-deoxydihydrokromycin	10.1016/j.tetlet.2017.03.088	2017	NPA024028	Original	Metabolomic	Polyketides	N/A
(4E)-12-deoxydihydrokromycin	10.1016/j.tetlet.2017.03.088	2017	NPA024027	Variant	Metabolomic	Polyketides	N/A
Gephyromycin B	10.1016/j.tetlet.2017.08.035	2017	NPA024053	Variant	Metabolomic	Polyketides	N/A
Gephyromycin C	10.1016/j.tetlet.2017.08.035	2017	NPA024054	Variant	Metabolomic	Polyketides	N/A
Isofusicomycin A	10.1021/acs.jnatprod.6b00676	2017	NPA022221	Original	Metabolomic	Terpenoids	N/A
14-hydroxycyclooctatin	10.1021/acs.jnatprod.6b00676	2017	NPA022216	Variant	Metabolomic	Terpenoids	N/A
12α-hydroxycyclooctatin	10.1021/acs.jnatprod.6b00676	2017	NPA022217	Variant	Metabolomic	Terpenoids	N/A
12β-hydroxycyclooctatin	10.1021/acs.jnatprod.6b00676	2017	NPA022218	Variant	Metabolomic	Terpenoids	N/A
Fusicomycin A	10.1021/acs.jnatprod.6b00676	2017	NPA022219	Variant	Metabolomic	Terpenoids	N/A
Fusicomycin B	10.1021/acs.jnatprod.6b00676	2017	NPA022220	Variant	Metabolomic	Terpenoids	N/A
Octaminomycin A	10.1021/acs.jnatprod.6b00758	2017	NPA022154	Variant	Metabolomic	Amino acids and Peptides, Polyketides	N/A
Octaminomycin B	10.1021/acs.jnatprod.6b00758	2017	NPA022155	Variant	Metabolomic	Amino acids and Peptides, Polyketides	N/A
1-O-(phenylacetyl)glycerol	10.1021/acs.jnatprod.6b00870	2017	NPA022284	Original	Metabolomic	Shikimates and Phenylpropanoids	N/A
(2R*,4S*)-2-((1′S*)-hydroxy-4′-methylpentyl)-4-(hydroxymethyl)butanolide	10.1021/acs.jnatprod.6b00870	2017	NPA022282	Variant	Metabolomic	Polyketides	N/A
(3R*,4S*,5R*,6S*)-tetrahydro-4-hydroxy-3,5,6-trimethyl-2-pyranone	10.1021/acs.jnatprod.6b00870	2017	NPA022283	Variant	Metabolomic	Polyketides	N/A
Nabscessin A	10.1021/acs.jnatprod.6b00935	2017	NPA022201	Original	Metabolomic		N/A
Nabscessin B	10.1021/acs.jnatprod.6b00935	2017	NPA022202	Variant	Metabolomic		N/A
Pyrrole-2-carboxamide	10.1021/acs.jnatprod.6b00948	2017	NPA022114	Original	Metabolomic	Alkaloids	N/A
Spoxazomicin D	10.1021/acs.jnatprod.6b00948	2017	NPA022109	Variant	Metabolomic		N/A
Oxachelin B	10.1021/acs.jnatprod.6b00948	2017	NPA022110	Variant	Metabolomic	Amino acids and Peptides	N/A
Oxachelin C	10.1021/acs.jnatprod.6b00948	2017	NPA022111	Variant	Metabolomic	Amino acids and Peptides	N/A
4-(Methylamino)benzamide	10.1021/acs.jnatprod.6b00948	2017	NPA022112	Variant	Metabolomic	Alkaloids	N/A
2-Hydroxybenzamide	10.1021/acs.jnatprod.6b00948	2017	NPA022113	Variant	Metabolomic	Alkaloids	N/A
Chloroindole	10.1021/acs.jnatprod.6b01016	2017	NPA022230	Original	Metabolomic	Alkaloids	N/A
Streptoone A	10.1021/acs.jnatprod.6b01016	2017	NPA022231	Original	Metabolomic	Terpenoids	N/A
Streptoone C	10.1021/acs.jnatprod.6b01016	2017	NPA022233	Variant	Metabolomic	Fatty acids	N/A
Streptoone B	10.1021/acs.jnatprod.6b01016	2017	NPA022232	Variant	Metabolomic	Fatty acids	N/A
Geranylpyrrol A	10.1021/acs.jnatprod.7b00016	2017	NPA022349	Original	Metabolomic	Alkaloids	N/A
Piericidin F	10.1021/acs.jnatprod.7b00016	2017	NPA022350	Variant	Metabolomic	Polyketides	N/A
Lorneic acid I	10.1021/acs.jnatprod.7b00056	2017	NPA022462	Original	Metabolomic	Polyketides	N/A
Lorneic acid E	10.1021/acs.jnatprod.7b00056	2017	NPA022458	Variant	Metabolomic	Polyketides	N/A
Lorneic acid F	10.1021/acs.jnatprod.7b00056	2017	NPA022459	Variant	Metabolomic	Polyketides	N/A
Lorneic acid G	10.1021/acs.jnatprod.7b00056	2017	NPA022460	Variant	Metabolomic	Polyketides	N/A
Lorneic acid H	10.1021/acs.jnatprod.7b00056	2017	NPA022461	Variant	Metabolomic	Polyketides	N/A
Lorneic acid J	10.1021/acs.jnatprod.7b00056	2017	NPA022463	Variant	Metabolomic	Polyketides	N/A
Abyssomicin X	10.1021/acs.jnatprod.7b00108	2017	NPA022255	Original	Metabolomic	Polyketides	N/A
Abyssomicin V	10.1021/acs.jnatprod.7b00108	2017	NPA022253	Variant	Metabolomic	Polyketides	N/A
Abyssomicin W	10.1021/acs.jnatprod.7b00108	2017	NPA022254	Variant	Metabolomic	Polyketides	N/A
Abyssomicin M	10.1021/acs.jnatprod.7b00108	2017	NPA022256	Variant	Metabolomic	Polyketides	N/A
Abyssomicin N	10.1021/acs.jnatprod.7b00108	2017	NPA022257	Variant	Metabolomic	Polyketides	N/A
Abyssomicin O	10.1021/acs.jnatprod.7b00108	2017	NPA022258	Variant	Metabolomic	Polyketides	N/A
Abyssomicin P	10.1021/acs.jnatprod.7b00108	2017	NPA022259	Variant	Metabolomic	Polyketides	N/A
Abyssomicin Q	10.1021/acs.jnatprod.7b00108	2017	NPA022260	Variant	Metabolomic	Polyketides	N/A
Abyssomicin R	10.1021/acs.jnatprod.7b00108	2017	NPA022261	Variant	Metabolomic	Polyketides	N/A
Abyssomicin S	10.1021/acs.jnatprod.7b00108	2017	NPA022262	Variant	Metabolomic	Polyketides	N/A
Abyssomicin T	10.1021/acs.jnatprod.7b00108	2017	NPA022263	Variant	Metabolomic	Polyketides	N/A
Abyssomicin U	10.1021/acs.jnatprod.7b00108	2017	NPA022264	Variant	Metabolomic	Polyketides	N/A
Nicrophorusamide A	10.1021/acs.jnatprod.7b00506	2017	NPA022508	Variant	Metabolomic	Amino acids and Peptides	N/A
Nicrophorusamide B	10.1021/acs.jnatprod.7b00506	2017	NPA022509	Variant	Metabolomic	Amino acids and Peptides	N/A
N-isobutylformamide	10.1021/acs.jnatprod.7b00789	2017	NPA028553	Original	Metabolomic		N/A
N-isopentylformamide	10.1021/acs.jnatprod.7b00789	2017	NPA028555	Original	Metabolomic	Alkaloids	N/A
N-isobutylmethanesulfinamide	10.1021/acs.jnatprod.7b00789	2017	NPA028557	Original	Metabolomic	Amino acids and Peptides	N/A
N-isopentylmethanesulfinamide	10.1021/acs.jnatprod.7b00789	2017	NPA028558	Original	Metabolomic		N/A
(E)-1-(furan-2-yl)-N-(2-methylbutyl)methanimine	10.1021/acs.jnatprod.7b00789	2017	NPA028566	Original	Metabolomic		N/A
N-isobutylacetamide	10.1021/acs.jnatprod.7b00789	2017	NPA028554	Variant	Metabolomic	Alkaloids	N/A
N-isopentylacetamide	10.1021/acs.jnatprod.7b00789	2017	NPA028556	Variant	Metabolomic	Alkaloids	N/A
(E)-N-isobutyl-1-phenylmethanimine	10.1021/acs.jnatprod.7b00789	2017	NPA028559	Variant	Metabolomic		N/A
(E)-2-((isobutylimino)methyl)phenol	10.1021/acs.jnatprod.7b00789	2017	NPA028560	Variant	Metabolomic		N/A
(E)-1-(furan-2-yl)-N-isobutylmethanimine	10.1021/acs.jnatprod.7b00789	2017	NPA028561	Variant	Metabolomic		N/A
(E)-N-isopentyl-1-phenylmethanimine	10.1021/acs.jnatprod.7b00789	2017	NPA028562	Variant	Metabolomic		N/A
(E)-2-((isopentylimino)methyl)phenol	10.1021/acs.jnatprod.7b00789	2017	NPA028563	Variant	Metabolomic		N/A
(E)-1-(furan-2-yl)-N-isopentylmethanimine	10.1021/acs.jnatprod.7b00789	2017	NPA028564	Variant	Metabolomic		N/A
(E)-N-(2-methylbutyl)-1-phenylmethanimine	10.1021/acs.jnatprod.7b00789	2017	NPA028565	Variant	Metabolomic		N/A
N,N'-diisobutylurea	10.1021/acs.jnatprod.7b00789	2017	NPA028567	Variant	Metabolomic		N/A
N,N'-diisobutyloxalamide	10.1021/acs.jnatprod.7b00789	2017	NPA028568	Variant	Metabolomic	Fatty acids	N/A
Nonthmicin	10.1021/acs.orglett.7b00318	2017	NPA023828	Variant	Metabolomic	Polyketides	N/A
Dentigerumycin C	10.1021/acs.orglett.7b00545	2017	NPA023829	Original	Metabolomic	Amino acids and Peptides	N/A
Dentigerumycin D	10.1021/acs.orglett.7b00545	2017	NPA023830	Variant	Metabolomic	Amino acids and Peptides	N/A
Dentigerumycin B	10.1021/acs.orglett.7b00545	2017	NPA023831	Variant	Metabolomic	Amino acids and Peptides, Polyketides	N/A
Amycolamycin A	10.1021/acs.orglett.7b03113	2017	NPA023896	Variant	Metabolomic	Shikimates and Phenylpropanoids	N/A
Amycolamycin B	10.1021/acs.orglett.7b03113	2017	NPA023897	Variant	Metabolomic	Shikimates and Phenylpropanoids	N/A
Ecteinamycin	10.1021/acschembio.7b00388	2017	NPA030410	Original	Metabolomic	Polyketides	N/A
Tryptorubin A	10.1021/jacs.7b06176	2017	NPA022838	Original	Metabolomic	Amino acids and Peptides	N/A
Germicidin I	10.1038/ja.2016.100	2017	NPA021557	Variant	Metabolomic	Polyketides	N/A
Hisunic acid	10.1038/ja.2016.111	2017	NPA021562	Original	Metabolomic	Terpenoids	N/A
Opantimycin A	10.1038/ja.2016.113	2017	NPA021556	Original	Metabolomic	Amino acids and Peptides	N/A
Dehydroxyaquayamycin B	10.1038/ja.2016.126	2017	NPA021573	Variant	Metabolomic	Polyketides	N/A
7-O-descarbamoyl-17-O-demethylreblastatin	10.1038/ja.2016.143	2017	NPA021579	Variant	Metabolomic	Polyketides	N/A
Simamycin	10.1038/ja.2016.163	2017	NPA021620	Variant	Metabolomic	Carbohydrates	N/A
RK-144171	10.1038/ja.2016.65	2017	NPA021545	Original	Metabolomic	Shikimates and Phenylpropanoids	N/A
Lentzeoside A	10.1038/ja.2016.78	2017	NPA021591	Original	Metabolomic	Fatty acids	N/A
Lentzeoside F	10.1038/ja.2016.78	2017	NPA021596	Variant	Metabolomic	Fatty acids	N/A
Lentzeoside B	10.1038/ja.2016.78	2017	NPA021592	Variant	Metabolomic	Fatty acids	N/A
Lentzeoside C	10.1038/ja.2016.78	2017	NPA021593	Variant	Metabolomic		N/A
Lentzeoside D	10.1038/ja.2016.78	2017	NPA021594	Variant	Metabolomic	Fatty acids	N/A
Lentzeoside E	10.1038/ja.2016.78	2017	NPA021595	Variant	Metabolomic	Fatty acids	N/A
Maoxianamide A	10.1038/ja.2016.90	2017	NPA021563	Original	Metabolomic		N/A
Maoxianamide B	10.1038/ja.2016.90	2017	NPA021564	Variant	Metabolomic		N/A
Pteridic acid C	10.1038/ja.2017.105	2017	NPA021682	Variant	Metabolomic	Polyketides	N/A
Pteridic acid D	10.1038/ja.2017.105	2017	NPA021683	Variant	Metabolomic	Polyketides	N/A
Pteridic acid E	10.1038/ja.2017.105	2017	NPA021684	Variant	Metabolomic	Polyketides	N/A
Pteridic acid F	10.1038/ja.2017.105	2017	NPA021685	Variant	Metabolomic	Polyketides	N/A
Pteridic acid G	10.1038/ja.2017.105	2017	NPA021686	Variant	Metabolomic	Polyketides	N/A
Bisoxazolomycin	10.1038/ja.2017.113	2017	NPA021690	Variant	Metabolomic	Amino acids and Peptides, Polyketides	N/A
Oxazolomycin A2	10.1038/ja.2017.113	2017	NPA021691	Variant	Metabolomic	Polyketides	N/A
Amycolatopsin A	10.1038/ja.2017.119	2017	NPA021693	Variant	Metabolomic	Polyketides	N/A
Amycolatopsin B	10.1038/ja.2017.119	2017	NPA021694	Variant	Metabolomic	Polyketides	N/A
Amycolatopsin C	10.1038/ja.2017.119	2017	NPA021695	Variant	Metabolomic	Polyketides	N/A
Fradiamine A	10.1038/ja.2017.26	2017	NPA021613	Variant	Metabolomic	Alkaloids	N/A
Nocazine F	10.1038/ja.2017.46	2017	NPA021648	Variant	Metabolomic	Alkaloids, Shikimates and Phenylpropanoids	N/A
Nocazine G	10.1038/ja.2017.46	2017	NPA021649	Variant	Metabolomic	Alkaloids, Shikimates and Phenylpropanoids	N/A
(S)-2-(5-(2,3-dihydroxy-3-methylbutyl)-1H-indol-3-yl)acetonitrile	10.1038/ja.2017.75	2017	NPA021675	Original	Metabolomic	Alkaloids	N/A
(5Z,8Z,11R*,12R*)-11,12-dihydroxytetradeca-5,8-dienamide	10.1038/ja.2017.75	2017	NPA021677	Original	Metabolomic	Fatty acids	N/A
(R)-7-acetyl-3,6-dihydroxy-8-propyl-3,4-dihydronaphthalen-1(2H)-one	10.1038/ja.2017.75	2017	NPA021676	Variant	Metabolomic	Polyketides	N/A
Ilamycin E1	10.1038/s41467-017-00419-5	2017	NPA031368	Variant	Metabolomic	Amino acids and Peptides	N/A
Flavofungin I	10.1038/s41598-017-01912-z	2017	NPA030413	Variant	Metabolomic	Polyketides	N/A
Flavofungin II	10.1038/s41598-017-01912-z	2017	NPA030414	Variant	Metabolomic	Polyketides	N/A
Flavofungin III	10.1038/s41598-017-01912-z	2017	NPA030415	Variant	Metabolomic	Polyketides	N/A
Flavofungin IV	10.1038/s41598-017-01912-z	2017	NPA030416	Variant	Metabolomic	Polyketides	N/A
Flavofungin V	10.1038/s41598-017-01912-z	2017	NPA030417	Variant	Metabolomic	Polyketides	N/A
Flavofungin VI	10.1038/s41598-017-01912-z	2017	NPA030418	Variant	Metabolomic	Polyketides	N/A
Flavofungin VII	10.1038/s41598-017-01912-z	2017	NPA030419	Variant	Metabolomic	Polyketides	N/A
Flavofungin VIII	10.1038/s41598-017-01912-z	2017	NPA030420	Variant	Metabolomic	Polyketides	N/A
Flavofungin IX	10.1038/s41598-017-01912-z	2017	NPA030421	Variant	Metabolomic	Polyketides	N/A
Neo-actinomycin A	10.1038/s41598-017-03769-8	2017	NPA030422	Variant	Metabolomic	Amino acids and Peptides	N/A
Neo-actinomycin B	10.1038/s41598-017-03769-8	2017	NPA030423	Variant	Metabolomic	Amino acids and Peptides	N/A
Antimycin E	10.1038/srep42180	2017	NPA030435	Variant	Metabolomic	Amino acids and Peptides, Polyketides	N/A
Antimycin F	10.1038/srep42180	2017	NPA030436	Variant	Metabolomic	Amino acids and Peptides, Polyketides	N/A
Antimycin G	10.1038/srep42180	2017	NPA030437	Variant	Metabolomic	Amino acids and Peptides, Polyketides	N/A
Antimycin H	10.1038/srep42180	2017	NPA030438	Variant	Metabolomic	Amino acids and Peptides, Polyketides	N/A
Deformylated antimycin A2a	10.1038/srep42180	2017	NPA030439	Variant	Metabolomic	Amino acids and Peptides, Polyketides	N/A
Deformylated antimycin A1a	10.1038/srep42180	2017	NPA030440	Variant	Metabolomic	Amino acids and Peptides, Polyketides	N/A
(+)-pratensilin A	10.1039/c7cc04983h	2017	NPA030458	Variant	Metabolomic	Polyketides	N/A
(-)-pratensilin A	10.1039/c7cc04983h	2017	NPA030459	Variant	Metabolomic	Polyketides	N/A
(+)-pratensilin B	10.1039/c7cc04983h	2017	NPA030460	Variant	Metabolomic	Polyketides	N/A
(-)-pratensilin B	10.1039/c7cc04983h	2017	NPA030461	Variant	Metabolomic	Polyketides	N/A
(+)-pratensilin C	10.1039/c7cc04983h	2017	NPA030462	Variant	Metabolomic	Alkaloids, Polyketides	N/A
(-)-pratensilin C	10.1039/c7cc04983h	2017	NPA030463	Variant	Metabolomic	Alkaloids, Polyketides	N/A
Rifamorpholine A	10.1039/c7ob00614d	2017	NPA032841	Variant	Metabolomic	Polyketides	N/A
Rifamorpholine B	10.1039/c7ob00614d	2017	NPA032842	Variant	Metabolomic	Polyketides	N/A
Rifamorpholine C	10.1039/c7ob00614d	2017	NPA032843	Variant	Metabolomic	Polyketides	N/A
Rifamorpholine D	10.1039/c7ob00614d	2017	NPA032844	Variant	Metabolomic	Polyketides	N/A
Rifamorpholine E	10.1039/c7ob00614d	2017	NPA032845	Variant	Metabolomic	Polyketides	N/A
Streptoarylpyrazole A	10.1055/s-0043-111897	2017	NPA030513	Original	Metabolomic	Alkaloids	N/A
23-O-butyrylbafilomycin D	10.1055/s-0043-111897	2017	NPA030512	Variant	Metabolomic	Polyketides	N/A
Tenvermectin C	10.1080/10286020.2016.1197911	2017	NPA024153	Variant	Metabolomic	Polyketides	N/A
Tenvermectin D	10.1080/10286020.2016.1197911	2017	NPA024154	Variant	Metabolomic	Polyketides	N/A
(2E,6E)-3,7,11-trimethyldodeca-2,6-dienedioic acid	10.1080/10286020.2017.1307189	2017	NPA024192	Original	Metabolomic	Fatty acids	N/A
(2E,6E)-10-methoxy-3,7-dimethyl-10-oxodeca-2,6-dienoic acid	10.1080/10286020.2017.1307189	2017	NPA024193	Variant	Metabolomic	Fatty acids	N/A
(-)-streptophenazine M	10.1080/14786419.2016.1169419	2017	NPA024475	Variant	Metabolomic	Alkaloids	N/A
(-)-Streptophenazine N	10.1080/14786419.2016.1169419	2017	NPA024476	Variant	Metabolomic	Alkaloids	N/A
(-)-streptophenazine O	10.1080/14786419.2016.1169419	2017	NPA024477	Variant	Metabolomic	Alkaloids	N/A
1(10)E,5E-germacradiene-9β,11-diol	10.1080/14786419.2016.1214831	2017	NPA024463	Variant	Metabolomic	Terpenoids	N/A
11-hydroxy-1(10)E,5E-germacradien-2-one	10.1080/14786419.2016.1214831	2017	NPA024464	Variant	Metabolomic	Terpenoids	N/A
27-methoxylmilbemycin α31	10.1080/14786419.2016.1244194	2017	NPA024485	Variant	Metabolomic	Polyketides	N/A
27-oxomilbemycin α31	10.1080/14786419.2016.1244194	2017	NPA024486	Variant	Metabolomic	Polyketides	N/A
Strefuranone A	10.1080/14786419.2016.1250091	2017	NPA024491	Original	Metabolomic		N/A
3-acetylamino-N-2-thienylpropanamide	10.1080/14786419.2016.1253079	2017	NPA024499	Original	Metabolomic	Alkaloids	N/A
Cyclo-(L-Leu-L-Glu-L-Leu-L-Glu)	10.1080/14786419.2016.1263849	2017	NPA024494	Variant	Metabolomic	Amino acids and Peptides	N/A
Cyclo-(L-Ile-L-Glu-L-Ile-L-Glu)	10.1080/14786419.2016.1263849	2017	NPA024495	Variant	Metabolomic	Amino acids and Peptides	N/A
Cyclo-(L-Val-L-Glu-L-Val-L-Glu)	10.1080/14786419.2016.1263849	2017	NPA024496	Variant	Metabolomic	Amino acids and Peptides	N/A
Kitamycin C	10.1080/14786419.2017.1295240	2017	NPA024510	Variant	Metabolomic	Amino acids and Peptides, Polyketides	N/A
Strepthonium A	10.1080/14786419.2017.1297443	2017	NPA030516	Original	Metabolomic	No Pathway	N/A
Nocapyrone R	10.1080/14786419.2017.1299730	2017	NPA024518	Original	Metabolomic	Polyketides	N/A
Nocapyrone S	10.1080/14786419.2017.1299730	2017	NPA024519	Variant	Metabolomic	Polyketides	N/A
Nocapyrone O	10.1080/14786419.2017.1299730	2017	NPA024520	Variant	Metabolomic	Polyketides	N/A
Nocapyrone P	10.1080/14786419.2017.1299730	2017	NPA024521	Variant	Metabolomic	Polyketides	N/A
Nocapyrone Q	10.1080/14786419.2017.1299730	2017	NPA024522	Variant	Metabolomic	Polyketides	N/A
Chlokamycin	10.1177/1934578x1701200818	2017	NPA031536	Variant	Metabolomic	Amino acids and Peptides, Polyketides	N/A
3'-hydroxy-N-(2-oxo-2,5-dihydrofuran-4-yl)propionamide	10.1515/znb-2016-0250	2017	NPA030521	Original	Metabolomic		N/A
4-methoxy-2H-isoquinolin-1-one	10.1515/znb-2016-0250	2017	NPA030522	Variant	Metabolomic	Alkaloids	N/A
Succinilene A	10.3390/md15020038	2017	NPA023136	Original	Metabolomic	Polyketides	N/A
Succinilene D	10.3390/md15020038	2017	NPA023139	Variant	Metabolomic	Polyketides	N/A
Succinilene B	10.3390/md15020038	2017	NPA023137	Variant	Metabolomic	Polyketides	N/A
Succinilene C	10.3390/md15020038	2017	NPA023138	Variant	Metabolomic	Polyketides	N/A
Lobophorin K	10.3390/md15050144	2017	NPA023186	Variant	Metabolomic	Polyketides	N/A
Borrelidin C	10.3390/md15060166	2017	NPA023191	Variant	Metabolomic	Polyketides	N/A
Borrelidin D	10.3390/md15060166	2017	NPA023192	Variant	Metabolomic	Polyketides	N/A
Borrelidin E	10.3390/md15060166	2017	NPA023193	Variant	Metabolomic	Polyketides	N/A
Bonnevillamide A	10.3390/md15070195	2017	NPA023213	Original	Metabolomic	Amino acids and Peptides	N/A
Bonnevillamide C	10.3390/md15070195	2017	NPA023215	Variant	Metabolomic	Amino acids and Peptides	N/A
Bonnevillamide B	10.3390/md15070195	2017	NPA023214	Variant	Metabolomic	Amino acids and Peptides	N/A
Microindolinone A	10.3390/md15070230	2017	NPA023212	Original	Metabolomic	Alkaloids	N/A
Saccharomonopyrone A	10.3390/md15080239	2017	NPA023228	Variant	Metabolomic	Polyketides	N/A
Saccharomonopyrone B	10.3390/md15080239	2017	NPA023229	Variant	Metabolomic	Polyketides	N/A
Saccharomonopyrone C	10.3390/md15080239	2017	NPA023230	Variant	Metabolomic	Polyketides	N/A
Strepchazolin A	10.3390/md15080244	2017	NPA023220	Original	Metabolomic	Alkaloids	N/A
Strepchazolin B	10.3390/md15080244	2017	NPA023221	Variant	Metabolomic	Alkaloids	N/A
Paulomycin G	10.3390/md15090271	2017	NPA023231	Variant	Metabolomic	Carbohydrates	N/A
Anandin A	10.3390/md15110355	2017	NPA023235	Variant	Metabolomic	Terpenoids	N/A
Anandin B	10.3390/md15110355	2017	NPA023236	Variant	Metabolomic	Terpenoids	N/A
Petrocidin A	10.3390/md15120383	2017	NPA023270	Original	Metabolomic	Alkaloids, Amino acids and Peptides	N/A
Zoumbericin A	10.3390/md15120389	2017	NPA023271	Original	Metabolomic	Polyketides	N/A
Zoumbericin B	10.3390/md15120389	2017	NPA023272	Original	Metabolomic	Polyketides	N/A
Germicidin K	10.3390/md15120389	2017	NPA023273	Original	Metabolomic	Polyketides	N/A
Germicidin L	10.3390/md15120389	2017	NPA023274	Variant	Metabolomic	Polyketides	N/A
4,7-dihydroxy-3-methyl-2-(4-methyl-1-oxopentyl)-6H-dibenzo[b,d]pyran-6-one	10.4014/jmb.1612.12025	2017	NPA030553	Variant	Metabolomic	Shikimates and Phenylpropanoids	N/A
16-hydroxymaltophilin	10.6023/cjoc201703048	2017	NPA030554	Variant	Metabolomic	Amino acids and Peptides, Polyketides	N/A
Salinilactone A	10.1002/anie.201807923	2018	NPA024417	Original	Metabolomic	Fatty acids, Polyketides	N/A
Salinilactone C	10.1002/anie.201807923	2018	NPA024419	Variant	Metabolomic	Polyketides	N/A
Salinilactone B	10.1002/anie.201807923	2018	NPA024418	Variant	Metabolomic		N/A
Violacin A	10.1016/j.bmcl.2018.01.051	2018	NPA027754	Variant	Metabolomic	Polyketides	N/A
Streptoxamine	10.1016/j.fitote.2018.03.008	2018	NPA028165	Original	Metabolomic	Alkaloids	N/A
Adxanthromicin A2	10.1016/j.phytol.2018.04.002	2018	NPA027682	Variant	Metabolomic	Polyketides	N/A
3-methoxy oxanthromicin	10.1016/j.phytol.2018.04.002	2018	NPA027683	Variant	Metabolomic	Polyketides	N/A
(+)-oxanthromicin E	10.1016/j.phytol.2018.04.002	2018	NPA027684	Variant	Metabolomic	Polyketides	N/A
(±)-hemi-oxanthromicin D	10.1016/j.phytol.2018.04.002	2018	NPA027685	Variant	Metabolomic	Polyketides	N/A
(+)-oxanthromicin F	10.1016/j.phytol.2018.04.002	2018	NPA027686	Variant	Metabolomic	Polyketides	N/A
(+)-oxanthromicin G	10.1016/j.phytol.2018.04.002	2018	NPA027687	Variant	Metabolomic	Polyketides	N/A
Azanthromicin A	10.1016/j.phytol.2018.04.002	2018	NPA027688	Variant	Metabolomic	Alkaloids	N/A
(±)-oxanthromicin G	10.1016/j.phytol.2018.04.002	2018	NPA027689	Variant	Metabolomic	Polyketides	N/A
Actinomycin D1	10.1016/j.tet.2018.08.023	2018	NPA023003	Variant	Metabolomic	Amino acids and Peptides	N/A
Actinomycin D2	10.1016/j.tet.2018.08.023	2018	NPA023004	Variant	Metabolomic	Amino acids and Peptides	N/A
Actinomycin D3	10.1016/j.tet.2018.08.023	2018	NPA023005	Variant	Metabolomic	Amino acids and Peptides	N/A
Actinomycin D4	10.1016/j.tet.2018.08.023	2018	NPA023006	Variant	Metabolomic	Amino acids and Peptides	N/A
Thioquinomycin A	10.1016/j.tet.2018.09.007	2018	NPA023007	Original	Metabolomic	Polyketides	N/A
Thioquinomycin D	10.1016/j.tet.2018.09.007	2018	NPA023010	Variant	Metabolomic	Polyketides	N/A
Thioquinomycin B	10.1016/j.tet.2018.09.007	2018	NPA023008	Variant	Metabolomic	Polyketides	N/A
Thioquinomycin C	10.1016/j.tet.2018.09.007	2018	NPA023009	Variant	Metabolomic	Polyketides	N/A
Kiamycin B	10.1016/j.tetlet.2018.04.063	2018	NPA024083	Variant	Metabolomic	Polyketides	N/A
Kiamycin C	10.1016/j.tetlet.2018.04.063	2018	NPA024084	Variant	Metabolomic	Polyketides	N/A
Borrelidin J	10.1016/j.tetlet.2018.11.023	2018	NPA024113	Variant	Metabolomic	Polyketides	N/A
Borrelidin K	10.1016/j.tetlet.2018.11.023	2018	NPA024114	Variant	Metabolomic	Polyketides	N/A
Borrelidin L	10.1016/j.tetlet.2018.11.023	2018	NPA024115	Variant	Metabolomic	Polyketides	N/A
Germicidin K	10.1021/acs.jafc.7b05330	2018	NPA028024	Variant	Metabolomic	Polyketides	N/A
Germicidin L	10.1021/acs.jafc.7b05330	2018	NPA028025	Variant	Metabolomic	Polyketides	N/A
Germicidin M	10.1021/acs.jafc.7b05330	2018	NPA028026	Variant	Metabolomic	Polyketides	N/A
Germicidin N	10.1021/acs.jafc.7b05330	2018	NPA028027	Variant	Metabolomic	Polyketides	N/A
Pentaminomycin A	10.1021/acs.jnatprod.7b00882	2018	NPA022585	Variant	Metabolomic	Amino acids and Peptides	N/A
Pentaminomycin B	10.1021/acs.jnatprod.7b00882	2018	NPA022586	Variant	Metabolomic	Amino acids and Peptides	N/A
Dinghupeptin A	10.1021/acs.jnatprod.7b01009	2018	NPA022773	Variant	Metabolomic	Amino acids and Peptides, Polyketides	N/A
Dinghupeptin B	10.1021/acs.jnatprod.7b01009	2018	NPA022774	Variant	Metabolomic	Amino acids and Peptides, Polyketides	N/A
Dinghupeptin C	10.1021/acs.jnatprod.7b01009	2018	NPA022775	Variant	Metabolomic	Amino acids and Peptides, Polyketides	N/A
Dinghupeptin D	10.1021/acs.jnatprod.7b01009	2018	NPA022776	Variant	Metabolomic	Amino acids and Peptides, Polyketides	N/A
Cyclizidine E	10.1021/acs.jnatprod.7b01055	2018	NPA022561	Original	Metabolomic	Alkaloids	N/A
Cyclizidine F	10.1021/acs.jnatprod.7b01055	2018	NPA022562	Variant	Metabolomic	Alkaloids	N/A
Cyclizidine B	10.1021/acs.jnatprod.7b01055	2018	NPA022558	Variant	Metabolomic	Alkaloids	N/A
Cyclizidine C	10.1021/acs.jnatprod.7b01055	2018	NPA022559	Variant	Metabolomic	Alkaloids	N/A
Cyclizidine D	10.1021/acs.jnatprod.7b01055	2018	NPA022560	Variant	Metabolomic	Alkaloids	N/A
Cyclizidine G	10.1021/acs.jnatprod.7b01055	2018	NPA022563	Variant	Metabolomic	Alkaloids	N/A
Cyclizidine H	10.1021/acs.jnatprod.7b01055	2018	NPA022564	Variant	Metabolomic	Alkaloids	N/A
Cyclizidine I	10.1021/acs.jnatprod.7b01055	2018	NPA022565	Variant	Metabolomic	Alkaloids	N/A
Hinduchelin A	10.1021/acs.jnatprod.8b00049	2018	NPA022702	Original	Metabolomic	Alkaloids	N/A
Hinduchelin D	10.1021/acs.jnatprod.8b00049	2018	NPA022705	Variant	Metabolomic	Alkaloids	N/A
Hinduchelin B	10.1021/acs.jnatprod.8b00049	2018	NPA022703	Variant	Metabolomic	Alkaloids	N/A
Hinduchelin C	10.1021/acs.jnatprod.8b00049	2018	NPA022704	Variant	Metabolomic	Alkaloids	N/A
Rishirilide C	10.1021/acs.jnatprod.8b00077	2018	NPA030645	Variant	Metabolomic	Polyketides	N/A
Lupinacidin D	10.1021/acs.jnatprod.8b00077	2018	NPA030646	Variant	Metabolomic	Polyketides	N/A
Aturanoside A	10.1021/acs.jnatprod.8b00307	2018	NPA022790	Variant	Metabolomic	Polyketides	N/A
Aturanoside B	10.1021/acs.jnatprod.8b00307	2018	NPA022791	Variant	Metabolomic	Polyketides	N/A
Aturanocin	10.1021/acs.jnatprod.8b00307	2018	NPA022792	Variant	Metabolomic	Polyketides	N/A
WS9326H	10.1021/acs.orglett.8b00546	2018	NPA023926	Variant	Metabolomic	Amino acids and Peptides, Polyketides	N/A
Anthranoside C	10.1021/acs.orglett.8b02382	2018	NPA023964	Original	Metabolomic	Alkaloids	N/A
Anthranoside A	10.1021/acs.orglett.8b02382	2018	NPA023962	Original	Metabolomic	Alkaloids, Shikimates and Phenylpropanoids	N/A
Anthranoside B	10.1021/acs.orglett.8b02382	2018	NPA023963	Variant	Metabolomic	Alkaloids, Shikimates and Phenylpropanoids	N/A
Streptoglyceride C	10.1021/acs.orglett.8b02411	2018	NPA023971	Original	Metabolomic	Polyketides	N/A
Streptoglyceride A	10.1021/acs.orglett.8b02411	2018	NPA023968	Original	Metabolomic	Polyketides	N/A
Streptoglyceride B	10.1021/acs.orglett.8b02411	2018	NPA023969	Variant	Metabolomic	Polyketides	N/A
Streptoglyceride D	10.1021/acs.orglett.8b02411	2018	NPA023970	Variant	Metabolomic		N/A
Catenulisporolide A	10.1021/acs.orglett.8b03160	2018	NPA023981	Original	Metabolomic	Polyketides	N/A
Catenulisporolide D	10.1021/acs.orglett.8b03160	2018	NPA023984	Variant	Metabolomic	Polyketides	N/A
Catenulisporolide B	10.1021/acs.orglett.8b03160	2018	NPA023982	Variant	Metabolomic	Polyketides	N/A
Catenulisporolide C	10.1021/acs.orglett.8b03160	2018	NPA023983	Variant	Metabolomic	Polyketides	N/A
Nocarditriene	10.1021/acschembio.8b00598	2018	NPA030683	Original	Metabolomic	Polyketides	N/A
Novodaryamide	10.1021/acschembio.8b00598	2018	NPA030682	Variant	Metabolomic	Polyketides	N/A
Valgamicin C	10.1038/ja.2017.135	2018	NPA021718	Variant	Metabolomic	Amino acids and Peptides, Polyketides	N/A
Rakicidin F	10.1038/ja.2017.92	2018	NPA021714	Variant	Metabolomic	Amino acids and Peptides, Polyketides	N/A
2,18-seco-lankacidinol B	10.1038/s41429-017-0004-0	2018	NPA021726	Original	Metabolomic	Polyketides	N/A
2,18-seco-lankacidinol A	10.1038/s41429-017-0004-0	2018	NPA021725	Variant	Metabolomic	Terpenoids	N/A
Kinanthraquinone	10.1038/s41429-017-0020-0	2018	NPA021738	Variant	Metabolomic	Polyketides	N/A
Fluvirucin B6	10.1038/s41429-018-0033-3	2018	NPA021742	Variant	Metabolomic	Amino acids and Peptides, Polyketides	N/A
Pyrizomicin A	10.1038/s41429-018-0038-y	2018	NPA021747	Variant	Metabolomic	Alkaloids	N/A
Pyrizomicin B	10.1038/s41429-018-0038-y	2018	NPA021748	Variant	Metabolomic	Alkaloids	N/A
Mayamycin B	10.1038/s41429-018-0039-x	2018	NPA021749	Variant	Metabolomic	Polyketides	N/A
Hamuramicin A	10.1038/s41429-018-0055-x	2018	NPA021768	Original	Metabolomic	Polyketides	N/A
Hamuramicin B	10.1038/s41429-018-0055-x	2018	NPA021769	Variant	Metabolomic	Polyketides	N/A
JS-3	10.1038/s41429-018-0059-6	2018	NPA021775	Variant	Metabolomic	Amino acids and Peptides	N/A
Quinomycin H1	10.1038/s41429-018-0083-6	2018	NPA021806	Variant	Metabolomic	Amino acids and Peptides, Polyketides	N/A
Quinomycin H2	10.1038/s41429-018-0083-6	2018	NPA021807	Variant	Metabolomic	Amino acids and Peptides, Polyketides	N/A
N-acetyl-L-leucine-L-serine-L-alanine	10.1038/s41598-017-18484-7	2018	NPA030686	Original	Metabolomic	Amino acids and Peptides	N/A
1-acetyl-2-isobutyrylpyrazolidine-4-carboxylic acid	10.1038/s41598-017-18484-7	2018	NPA030687	Original	Metabolomic	Alkaloids	N/A
1-hydroxymethyl-8-hydroxy-anthraquinone-3-carboxylic acid	10.1038/s41598-017-18484-7	2018	NPA030688	Variant	Metabolomic	Polyketides	N/A
Phaeochromycin I	10.1038/s41598-017-18484-7	2018	NPA030689	Variant	Metabolomic	Polyketides	N/A
FR900452 B	10.1039/c8ob01181h	2018	NPA027784	Variant	Metabolomic	Alkaloids, Amino acids and Peptides	N/A
FR900452 C	10.1039/c8ob01181h	2018	NPA027785	Variant	Metabolomic	Alkaloids, Amino acids and Peptides	N/A
Grincamycin I	10.1055/s-0043-119888	2018	NPA030732	Variant	Metabolomic	Polyketides	N/A
Grincamycin J	10.1055/s-0043-119888	2018	NPA030733	Variant	Metabolomic	Polyketides	N/A
Grincamycin K	10.1055/s-0043-119888	2018	NPA030734	Variant	Metabolomic	Polyketides	N/A
1,4,6-trihydroxy-8-hexyl-9,10-anthraquinone	10.1080/14786419.2017.1314285	2018	NPA024554	Variant	Metabolomic	Polyketides	N/A
1,4,6-trihydroxy-8-pentacarboxyl-9,10-anthraquinone	10.1080/14786419.2017.1314285	2018	NPA024555	Variant	Metabolomic	Polyketides	N/A
1,4,6-trihydroxy-8-(2′-oxopentyl)-9,10-anthraquinone	10.1080/14786419.2017.1314285	2018	NPA024556	Variant	Metabolomic	Polyketides	N/A
1,4,6-trihydroxy-8-(2′-oxohexyl)-9,10-anthraquinone	10.1080/14786419.2017.1314285	2018	NPA024557	Variant	Metabolomic	Polyketides	N/A
5-(1′′,3′′-dimethyl-2′′-hydroxyl-butyl)-2-en-2-methyl-3-rhamnosyl-δ-valerolactone	10.1080/14786419.2017.1315578	2018	NPA024567	Original	Metabolomic		N/A
N1-acetyl-N7-o-hydroxyphenylacetyl cadaverine	10.1080/14786419.2017.1315578	2018	NPA024562	Variant	Metabolomic	Alkaloids	N/A
N1-acetyl-N7-4′′-methyl-3′′-pentenoyl cadaverine	10.1080/14786419.2017.1315578	2018	NPA024563	Variant	Metabolomic	Alkaloids	N/A
N1-acetyl-N7-4′′-methyl-pentoyl cadaverine	10.1080/14786419.2017.1315578	2018	NPA024564	Variant	Metabolomic	Alkaloids	N/A
N1-acetyl-N7-n-hexanoyl cadaverine	10.1080/14786419.2017.1315578	2018	NPA024565	Variant	Metabolomic	Alkaloids	N/A
4-rhamnosyl-phenylethylene	10.1080/14786419.2017.1315578	2018	NPA024566	Variant	Metabolomic	Shikimates and Phenylpropanoids	N/A
FW05328-1	10.1080/14786419.2017.1366479	2018	NPA024588	Variant	Metabolomic	Amino acids and Peptides, Polyketides	N/A
12-N-methyl-k252c	10.1080/14786419.2018.1428595	2018	NPA030748	Variant	Metabolomic	Alkaloids	N/A
Funisamine	10.1128/AEM.01125-18	2018	NPA028507	Variant	Metabolomic	Polyketides	N/A
Ochangoside	10.1177/1934578X1801300211	2018	NPA028269	Variant	Metabolomic	Carbohydrates	N/A
Cornifronin A	10.1177/1934578X1801300605	2018	NPA028273	Variant	Metabolomic	Alkaloids	N/A
Cornifronin B	10.1177/1934578X1801300605	2018	NPA028274	Variant	Metabolomic	Alkaloids	N/A
Trinulactone A	10.1177/1934578X1801301105	2018	NPA028263	Original	Metabolomic	Terpenoids	N/A
Trinulactone B	10.1177/1934578X1801301105	2018	NPA028260	Variant	Metabolomic	Terpenoids	N/A
Trinulactone C	10.1177/1934578X1801301105	2018	NPA028261	Variant	Metabolomic	Terpenoids	N/A
Trinulactone D	10.1177/1934578X1801301105	2018	NPA028262	Variant	Metabolomic	Terpenoids	N/A
Mumiamicin	10.2323/jgam.2017.06.004	2018	NPA030753	Original	Metabolomic	Fatty acids	N/A
Huanglongmycin B	10.3389/fchem.2018.00254	2018	NPA032868	Variant	Metabolomic	Polyketides	N/A
Huanglongmycin C	10.3389/fchem.2018.00254	2018	NPA032869	Variant	Metabolomic	Polyketides	N/A
Antartin	10.3390/md16040130	2018	NPA023317	Original	Metabolomic	Terpenoids	N/A
Urdamycin N8	10.3390/md16060185	2018	NPA023351	Variant	Metabolomic	Polyketides	N/A
Urdamycin N9	10.3390/md16060185	2018	NPA023352	Variant	Metabolomic	Polyketides	N/A
Urdamycin N5	10.3390/md16060185	2018	NPA023353	Variant	Metabolomic	Polyketides	N/A
Urdamycin N1	10.3390/md16060185	2018	NPA023354	Variant	Metabolomic	Polyketides	N/A
Urdamycin N2	10.3390/md16060185	2018	NPA023355	Variant	Metabolomic	Polyketides	N/A
Urdamycin N3	10.3390/md16060185	2018	NPA023356	Variant	Metabolomic	Polyketides	N/A
Urdamycin N4	10.3390/md16060185	2018	NPA023357	Variant	Metabolomic	Polyketides	N/A
Urdamycin N6	10.3390/md16060185	2018	NPA023358	Variant	Metabolomic	Polyketides	N/A
Urdamycin N7	10.3390/md16060185	2018	NPA023359	Variant	Metabolomic	Polyketides	N/A
Herbimycin G	10.3390/md16060189	2018	NPA023360	Variant	Metabolomic	Polyketides	N/A
Albisporachelin	10.3390/md16060199	2018	NPA023366	Variant	Metabolomic	Amino acids and Peptides	N/A
Nocardiotide A	10.3390/md16090290	2018	NPA023434	Variant	Metabolomic	Amino acids and Peptides	N/A
Bagremycin F	10.3390/md16090330	2018	NPA023450	Variant	Metabolomic	Shikimates and Phenylpropanoids	N/A
Bagremycin G	10.3390/md16090330	2018	NPA023451	Variant	Metabolomic	Shikimates and Phenylpropanoids	N/A
Stremycin A	10.3390/md16090331	2018	NPA023448	Variant	Metabolomic	Polyketides	N/A
Stremycin B	10.3390/md16090331	2018	NPA023449	Variant	Metabolomic	Polyketides	N/A
Landomycin N	10.3390/md16120470	2018	NPA030849	Variant	Metabolomic	Polyketides	N/A
Galtamycin C	10.3390/md16120470	2018	NPA030850	Variant	Metabolomic	Polyketides	N/A
Vineomycin D	10.3390/md16120470	2018	NPA030851	Variant	Metabolomic	Polyketides	N/A
Terretonin N	10.3390/molecules23020299	2018	NPA027881	Original	Metabolomic	Polyketides, Terpenoids	N/A
Anthocidin A	10.3390/molecules23051032	2018	NPA027896	Variant	Metabolomic	Shikimates and Phenylpropanoids	N/A
Anthocidin B	10.3390/molecules23051032	2018	NPA027897	Variant	Metabolomic	Shikimates and Phenylpropanoids	N/A
Anthocidin C	10.3390/molecules23051032	2018	NPA027898	Variant	Metabolomic	Shikimates and Phenylpropanoids	N/A
Anthocidin D	10.3390/molecules23051032	2018	NPA027899	Variant	Metabolomic	Shikimates and Phenylpropanoids	N/A
Depsidomycin B	10.3390/molecules23061266	2018	NPA027903	Variant	Metabolomic	Amino acids and Peptides, Polyketides	N/A
Depsidomycin C	10.3390/molecules23061266	2018	NPA027904	Variant	Metabolomic	Amino acids and Peptides, Polyketides	N/A
Lugdunomycin	10.1002/anie.201814581	2019	NPA025656	Original	Metabolomic	Alkaloids, Polyketides	N/A
Not named	10.1002/anie.201814581	2019	NPA025665	Original	Metabolomic		N/A
Not named	10.1002/anie.201814581	2019	NPA025664	Variant	Metabolomic	Polyketides	N/A
Not named	10.1002/anie.201814581	2019	NPA025657	Variant	Metabolomic	Polyketides	N/A
Not named	10.1002/anie.201814581	2019	NPA025658	Variant	Metabolomic	Polyketides	N/A
Not named	10.1002/anie.201814581	2019	NPA025659	Variant	Metabolomic	Alkaloids	N/A
Not named	10.1002/anie.201814581	2019	NPA025660	Variant	Metabolomic	Alkaloids, Polyketides	N/A
Not named	10.1002/anie.201814581	2019	NPA025661	Variant	Metabolomic	Polyketides	N/A
Not named	10.1002/anie.201814581	2019	NPA025662	Variant	Metabolomic	Polyketides	N/A
Not named	10.1002/anie.201814581	2019	NPA025663	Variant	Metabolomic	Polyketides	N/A
Not named	10.1002/anie.201814581	2019	NPA025666	Variant	Metabolomic	Polyketides	N/A
Not named	10.1002/anie.201814581	2019	NPA025667	Variant	Metabolomic	Polyketides	N/A
Perquinoline A	10.1002/anie.201905538	2019	NPA025691	Original	Metabolomic		N/A
Perquinoline C	10.1002/anie.201905538	2019	NPA025693	Variant	Metabolomic		N/A
Perquinoline B	10.1002/anie.201905538	2019	NPA025692	Variant	Metabolomic		N/A
Albocycline D	10.1002/cbdv.201800344	2019	NPA026383	Original	Metabolomic	Polyketides	N/A
Albocycline A	10.1002/cbdv.201800344	2019	NPA026380	Variant	Metabolomic	Polyketides	N/A
Albocycline B	10.1002/cbdv.201800344	2019	NPA026381	Variant	Metabolomic	Polyketides	N/A
Albocycline C	10.1002/cbdv.201800344	2019	NPA026382	Variant	Metabolomic	Polyketides	N/A
Chartrenoline	10.1016/j.cclet.2018.10.030	2019	NPA027176	Original	Metabolomic	Alkaloids	N/A
5-chloro-3-hydroxy-6-methoxy-3-(2-oxopropyl)-N-methyl-2-oxindole	10.1016/j.fitote.2019.104357	2019	NPA027077	Original	Metabolomic	Alkaloids	N/A
3-hydroxy-6-methoxy-3-(2-oxopropyl)-N-methyl-2-oxindole	10.1016/j.fitote.2019.104357	2019	NPA027076	Variant	Metabolomic	Alkaloids	N/A
4-hydroxy-6-(2-hydroxy-2-phenyl-1-methylethyl)-3-methyl-2H-pyran-2-one	10.1016/j.fitote.2019.104357	2019	NPA027078	Variant	Metabolomic	Polyketides	N/A
Nitricquinomycin B	10.1016/j.tet.2019.05.060	2019	NPA025751	Variant	Metabolomic	Polyketides	N/A
Nitricquinomycin A	10.1016/j.tet.2019.05.060	2019	NPA025752	Variant	Metabolomic	Polyketides	N/A
Nitricquinomycin C	10.1016/j.tet.2019.05.060	2019	NPA025753	Variant	Metabolomic	Polyketides	N/A
Lactoquinomycin E	10.1016/j.tet.2019.05.060	2019	NPA025754	Variant	Metabolomic	Polyketides	N/A
Legonoxamine A	10.1016/j.tetlet.2018.11.063	2019	NPA025612	Variant	Metabolomic	Fatty acids	N/A
Legonoxamine B	10.1016/j.tetlet.2018.11.063	2019	NPA025613	Variant	Metabolomic	Alkaloids, Fatty acids	N/A
Murayaquinone C	10.1016/j.tetlet.2019.05.048	2019	NPA025624	Original	Metabolomic		N/A
(-)-murayaquinone B	10.1016/j.tetlet.2019.05.048	2019	NPA025622	Variant	Metabolomic	Polyketides	N/A
(+)-murayaquinone B	10.1016/j.tetlet.2019.05.048	2019	NPA025623	Variant	Metabolomic	Polyketides	N/A
Murayaquinone D	10.1016/j.tetlet.2019.05.048	2019	NPA025625	Variant	Metabolomic	Polyketides	N/A
Murayaquinone E	10.1016/j.tetlet.2019.05.048	2019	NPA025626	Variant	Metabolomic	Polyketides	N/A
Phenazin SA	10.1016/S1875-5364(19)30055-X	2019	NPA027225	Variant	Metabolomic	Alkaloids	N/A
Phenazin SB	10.1016/S1875-5364(19)30055-X	2019	NPA027226	Variant	Metabolomic	Alkaloids	N/A
Phenazine SC	10.1016/S1875-5364(19)30055-X	2019	NPA027227	Variant	Metabolomic	Alkaloids	N/A
Cangumycin A	10.1016/S1875-5364(19)30121-9	2019	NPA027215	Variant	Metabolomic	Polyketides	N/A
Cangumycin B	10.1016/S1875-5364(19)30121-9	2019	NPA027216	Variant	Metabolomic	Polyketides	N/A
Cangumycin C	10.1016/S1875-5364(19)30121-9	2019	NPA027217	Variant	Metabolomic	Polyketides	N/A
Cangumycin D	10.1016/S1875-5364(19)30121-9	2019	NPA027218	Variant	Metabolomic	Polyketides	N/A
Cangumycin E	10.1016/S1875-5364(19)30121-9	2019	NPA027219	Variant	Metabolomic	Polyketides	N/A
Cangumycin F	10.1016/S1875-5364(19)30121-9	2019	NPA027220	Variant	Metabolomic	Polyketides	N/A
Strepphenazine A	10.1021/acs.jafc.9b04191	2019	NPA026325	Variant	Metabolomic	Alkaloids	N/A
Strepphenazine B	10.1021/acs.jafc.9b04191	2019	NPA026326	Variant	Metabolomic	Alkaloids	N/A
Strepphenazine C	10.1021/acs.jafc.9b04191	2019	NPA026327	Variant	Metabolomic	Alkaloids	N/A
11-Demethyl-piericidin A	10.1021/acs.jmedchem.9b00598	2019	NPA031477	Variant	Metabolomic	Alkaloids, Polyketides	N/A
(2E,5E,7E,11E,9R,10R,13S,19R)-13,19-dihydroxyl-IT-143-A	10.1021/acs.jmedchem.9b00598	2019	NPA031478	Variant	Metabolomic	Polyketides	N/A
(2E,5E,7E,11E,9R,10R,13R,19S)-13,19-dihydroxyl-IT-143-A	10.1021/acs.jmedchem.9b00598	2019	NPA031479	Variant	Metabolomic	Polyketides	N/A
10-Ketone piericidin A	10.1021/acs.jmedchem.9b00598	2019	NPA031480	Variant	Metabolomic	Alkaloids, Polyketides	N/A
7-Demethylglucopiericidin A	10.1021/acs.jmedchem.9b00598	2019	NPA031481	Variant	Metabolomic	Polyketides	N/A
7-Demethyl-13-hydroxyglucopiericidin A	10.1021/acs.jmedchem.9b00598	2019	NPA031482	Variant	Metabolomic	Polyketides	N/A
13-Hydroxypiericidin A 10-O-α-D-galactose (1→6)-β-D-glucoside	10.1021/acs.jmedchem.9b00598	2019	NPA031483	Variant	Metabolomic	Polyketides	N/A
13-Hydroxypiericidin A 10-O-α-D-glucose (1→6)-β-D-glucoside	10.1021/acs.jmedchem.9b00598	2019	NPA031484	Variant	Metabolomic	Polyketides	N/A
4'-O-β-D-Glucose glucopiericidin A	10.1021/acs.jmedchem.9b00598	2019	NPA031485	Variant	Metabolomic	Polyketides	N/A
4'-O-β-D-Glucose 13-hydroxyglucopiericidin A	10.1021/acs.jmedchem.9b00598	2019	NPA031486	Variant	Metabolomic		N/A
4'-O-β-D-Glucose piericidin A 10-O-α-D-glucose (1→6)-β-D-glucoside	10.1021/acs.jmedchem.9b00598	2019	NPA031487	Variant	Metabolomic	Terpenoids	N/A
5-Hydroxy-6-hydroxymethyl glucopiericidin A	10.1021/acs.jmedchem.9b00598	2019	NPA031488	Variant	Metabolomic	Polyketides	N/A
5-Hydroxy-6-hydroxymethyl-13-hydroxyglucopiericidin A	10.1021/acs.jmedchem.9b00598	2019	NPA031489	Variant	Metabolomic	Polyketides	N/A
2-Hydroxymethyl-Δ3, 4-glucopiericidin A	10.1021/acs.jmedchem.9b00598	2019	NPA031490	Variant	Metabolomic	Polyketides	N/A
(11S,12R) Piericidin C1 10-O-β-D-glucoside	10.1021/acs.jmedchem.9b00598	2019	NPA031491	Variant	Metabolomic	Polyketides	N/A
(11R,12S) Piericidin C1 10-O-β-D-glucoside	10.1021/acs.jmedchem.9b00598	2019	NPA031492	Variant	Metabolomic	Polyketides	N/A
13-Dimethoxy glucopiericidin A	10.1021/acs.jmedchem.9b00598	2019	NPA031493	Variant	Metabolomic	Polyketides	N/A
Kenalactam D	10.1021/acs.jnatprod.8b00708	2019	NPA025166	Original	Metabolomic	Amino acids and Peptides, Polyketides	N/A
Kenalactam E	10.1021/acs.jnatprod.8b00708	2019	NPA025162	Variant	Metabolomic	Amino acids and Peptides, Polyketides	N/A
Kenalactam A	10.1021/acs.jnatprod.8b00708	2019	NPA025163	Variant	Metabolomic	Amino acids and Peptides, Polyketides	N/A
Kenalactam B	10.1021/acs.jnatprod.8b00708	2019	NPA025164	Variant	Metabolomic	Amino acids and Peptides, Polyketides	N/A
Kenalactam C	10.1021/acs.jnatprod.8b00708	2019	NPA025165	Variant	Metabolomic	Amino acids and Peptides, Polyketides	N/A
Acidiphilamide A	10.1021/acs.jnatprod.8b00828	2019	NPA025025	Variant	Metabolomic	Amino acids and Peptides	N/A
Acidiphilamide B	10.1021/acs.jnatprod.8b00828	2019	NPA025026	Variant	Metabolomic	Amino acids and Peptides	N/A
Acidiphilamide C	10.1021/acs.jnatprod.8b00828	2019	NPA025027	Variant	Metabolomic	Amino acids and Peptides	N/A
Acidiphilamide D	10.1021/acs.jnatprod.8b00828	2019	NPA025028	Variant	Metabolomic	Amino acids and Peptides	N/A
Acidiphilamide E	10.1021/acs.jnatprod.8b00828	2019	NPA025029	Variant	Metabolomic	Amino acids and Peptides	N/A
Camporidine A	10.1021/acs.jnatprod.8b01000	2019	NPA025087	Variant	Metabolomic	Alkaloids, Polyketides	N/A
Camporidine B	10.1021/acs.jnatprod.8b01000	2019	NPA025088	Variant	Metabolomic	Polyketides	N/A
Salinaphthoquinone D	10.1021/acs.jnatprod.9b00062	2019	NPA025277	Original	Metabolomic	Polyketides	N/A
Salinaphthoquinone E	10.1021/acs.jnatprod.9b00062	2019	NPA025278	Original	Metabolomic	Polyketides	N/A
Salinaphthoquinone A	10.1021/acs.jnatprod.9b00062	2019	NPA025274	Original	Metabolomic	Polyketides	N/A
Salinaphthoquinone C	10.1021/acs.jnatprod.9b00062	2019	NPA025276	Variant	Metabolomic	Polyketides	N/A
Salinaphthoquinone B	10.1021/acs.jnatprod.9b00062	2019	NPA025275	Variant	Metabolomic	Polyketides	N/A
Rubromycin CA1	10.1021/acs.jnatprod.9b00107	2019	NPA025238	Variant	Metabolomic	Shikimates and Phenylpropanoids	N/A
Rubromycin CA2	10.1021/acs.jnatprod.9b00107	2019	NPA025239	Variant	Metabolomic	Polyketides	N/A
Streptcytosine J	10.1021/acs.jnatprod.9b00260	2019	NPA025441	Variant	Metabolomic	Carbohydrates	N/A
Streptcytosine M	10.1021/acs.jnatprod.9b00260	2019	NPA025442	Variant	Metabolomic	Carbohydrates	N/A
Cytosaminomycin E	10.1021/acs.jnatprod.9b00260	2019	NPA025443	Variant	Metabolomic	Carbohydrates	N/A
Streptcytosine F	10.1021/acs.jnatprod.9b00260	2019	NPA025444	Variant	Metabolomic	Carbohydrates	N/A
Streptcytosine G	10.1021/acs.jnatprod.9b00260	2019	NPA025445	Variant	Metabolomic	Carbohydrates	N/A
Streptcytosine H	10.1021/acs.jnatprod.9b00260	2019	NPA025446	Variant	Metabolomic	Carbohydrates	N/A
Streptcytosine I	10.1021/acs.jnatprod.9b00260	2019	NPA025447	Variant	Metabolomic	Carbohydrates	N/A
Streptcytosine O	10.1021/acs.jnatprod.9b00260	2019	NPA025448	Variant	Metabolomic	Carbohydrates	N/A
Streptcytosine L	10.1021/acs.jnatprod.9b00260	2019	NPA025449	Variant	Metabolomic	Carbohydrates	N/A
Streptcytosine N	10.1021/acs.jnatprod.9b00260	2019	NPA025450	Variant	Metabolomic	Carbohydrates	N/A
Streptcytosine K	10.1021/acs.jnatprod.9b00260	2019	NPA025451	Variant	Metabolomic	Carbohydrates	N/A
Baraphenazine A	10.1021/acs.jnatprod.9b00289	2019	NPA025244	Original	Metabolomic	Alkaloids	N/A
Baraphenazine C	10.1021/acs.jnatprod.9b00289	2019	NPA025246	Variant	Metabolomic	Alkaloids	N/A
Baraphenazine B	10.1021/acs.jnatprod.9b00289	2019	NPA025245	Variant	Metabolomic	Alkaloids	N/A
Baraphenazine D	10.1021/acs.jnatprod.9b00289	2019	NPA025247	Variant	Metabolomic	Alkaloids	N/A
Baraphenazine E	10.1021/acs.jnatprod.9b00289	2019	NPA025248	Variant	Metabolomic	Alkaloids	N/A
Baraphenazine F	10.1021/acs.jnatprod.9b00289	2019	NPA025249	Variant	Metabolomic	Alkaloids	N/A
Baraphenazine G	10.1021/acs.jnatprod.9b00289	2019	NPA025250	Variant	Metabolomic	Alkaloids	N/A
Kendomycin B	10.1021/acs.jnatprod.9b00654	2019	NPA025561	Variant	Metabolomic	Polyketides	N/A
Kendomycin C	10.1021/acs.jnatprod.9b00654	2019	NPA025562	Variant	Metabolomic	Polyketides	N/A
Kendomycin D	10.1021/acs.jnatprod.9b00654	2019	NPA025563	Variant	Metabolomic	Polyketides	N/A
Phallusialide A	10.1021/acs.jnatprod.9b00808	2019	NPA031083	Original	Metabolomic		N/A
Phallusialide E	10.1021/acs.jnatprod.9b00808	2019	NPA031087	Variant	Metabolomic	Polyketides	N/A
Phallusialide B	10.1021/acs.jnatprod.9b00808	2019	NPA031084	Variant	Metabolomic		N/A
Phallusialide C	10.1021/acs.jnatprod.9b00808	2019	NPA031085	Variant	Metabolomic		N/A
Phallusialide D	10.1021/acs.jnatprod.9b00808	2019	NPA031086	Variant	Metabolomic	Polyketides	N/A
Iakyricidin B	10.1021/acs.joc.9b01270	2019	NPA025599	Original	Metabolomic	Polyketides	N/A
Iakyricidin D	10.1021/acs.joc.9b01270	2019	NPA025601	Variant	Metabolomic	Polyketides	N/A
Iakyricidin A	10.1021/acs.joc.9b01270	2019	NPA025598	Variant	Metabolomic	Polyketides	N/A
Iakyricidin C	10.1021/acs.joc.9b01270	2019	NPA025600	Variant	Metabolomic	Polyketides	N/A
Bombyxamycin A	10.1021/acs.orglett.9b00384	2019	NPA026755	Variant	Metabolomic	Amino acids and Peptides, Polyketides	N/A
Bombyxamycin B	10.1021/acs.orglett.9b00384	2019	NPA026756	Variant	Metabolomic	Amino acids and Peptides, Polyketides	N/A
Donghaesulfin A	10.1021/acs.orglett.9b01057	2019	NPA026781	Original	Metabolomic	Polyketides	N/A
Donghaesulfin B	10.1021/acs.orglett.9b01057	2019	NPA026782	Variant	Metabolomic	Polyketides	N/A
Merochlorin E	10.1021/acs.orglett.9b01440	2019	NPA026812	Original	Metabolomic	Terpenoids	N/A
Merochlorin F	10.1021/acs.orglett.9b01440	2019	NPA026813	Variant	Metabolomic	Terpenoids	N/A
Meroindenon	10.1021/acs.orglett.9b01440	2019	NPA026811	Variant	Metabolomic	Polyketides	N/A
Cyclamenol D	10.1021/acs.orglett.9b01710	2019	NPA026789	Original	Metabolomic	Amino acids and Peptides, Polyketides	N/A
Cyclamenol B	10.1021/acs.orglett.9b01710	2019	NPA026787	Original	Metabolomic	Polyketides	N/A
Cyclamenol C	10.1021/acs.orglett.9b01710	2019	NPA026788	Variant	Metabolomic	Polyketides	N/A
Tenebrathin	10.1021/acs.orglett.9b02443	2019	NPA026820	Original	Metabolomic	Polyketides	N/A
Nesteretal A	10.1021/acs.orglett.9b02634	2019	NPA026844	Original	Metabolomic	Polyketides, Terpenoids	N/A
Virantmycin B	10.1038/s41429-018-0117-0	2019	NPA024890	Variant	Metabolomic	Alkaloids	N/A
Virantmycin C	10.1038/s41429-018-0117-0	2019	NPA024891	Variant	Metabolomic	Alkaloids	N/A
Geninthiocin C	10.1038/s41429-018-0127-y	2019	NPA024887	Variant	Metabolomic	Amino acids and Peptides	N/A
Geninthiocin D	10.1038/s41429-018-0127-y	2019	NPA024888	Variant	Metabolomic	Amino acids and Peptides	N/A
9-methylstreptimidone 2-α-D-glucopyranoside	10.1038/s41429-019-0143-6	2019	NPA024905	Original	Metabolomic	Alkaloids	N/A
Hydroxyiso-9-methylstreptimidone	10.1038/s41429-019-0143-6	2019	NPA024906	Variant	Metabolomic	Alkaloids	N/A
Albumycin	10.1038/s41429-019-0161-4	2019	NPA024908	Variant	Metabolomic	Polyketides	N/A
Methyl 6-carbamoylphenazine-1-carboxylate	10.1038/s41429-019-0163-2	2019	NPA024909	Variant	Metabolomic	Alkaloids	N/A
Provipeptide A	10.1038/s41429-019-0201-0	2019	NPA024925	Variant	Metabolomic	Amino acids and Peptides	N/A
Provipeptide B	10.1038/s41429-019-0201-0	2019	NPA024926	Variant	Metabolomic	Amino acids and Peptides	N/A
Nocardamin glucuronide	10.1038/s41429-019-0217-5	2019	NPA024941	Variant	Metabolomic	Amino acids and Peptides	N/A
Cycloheptamycin B	10.1039/c9ob01261c	2019	NPA025802	Variant	Metabolomic	Amino acids and Peptides, Polyketides	N/A
(+)-actinoxocine	10.1039/c9qo01154d	2019	NPA031142	Variant	Metabolomic	Polyketides	N/A
(-)-actinoxocine	10.1039/c9qo01154d	2019	NPA031143	Variant	Metabolomic	Polyketides	N/A
Actinaphthoran A	10.1039/c9qo01154d	2019	NPA031144	Variant	Metabolomic	Polyketides	N/A
Actinaphthoran B	10.1039/c9qo01154d	2019	NPA031145	Variant	Metabolomic	Polyketides	N/A
F-Met I	10.1039/c9sc03374b	2019	NPA026373	Variant	Metabolomic	Carbohydrates	N/A
F-Met II	10.1039/c9sc03374b	2019	NPA026374	Variant	Metabolomic	Carbohydrates	N/A
[truncated: 553 more rows]

## Sheet: Additional entries2021-2023
Compound name	Reference DOI	Year	Approach
Isopterfuranone	10.1002/cbdv.202100211	2021	Bioassay
Isopterchiayione	10.1002/cbdv.202100211	2021	Bioassay
Isopterinoid	10.1002/cbdv.202100211	2021	Bioassay
Chiayiflavan A	10.1002/cbdv.202100211	2021	Bioassay
Chiayiflavan B	10.1002/cbdv.202100211	2021	Bioassay
Chiayiflavan C	10.1002/cbdv.202100211	2021	Bioassay
Chiayiflavan D	10.1002/cbdv.202100211	2021	Bioassay
Chiayiflavan E	10.1002/cbdv.202100211	2021	Bioassay
Bluemomycin	10.1007/s10529-021-03089-y	2021	Bioassay
compound 1	10.1080/14786419.2019.1639174	2021	Bioassay
compound 2	10.1080/14786419.2019.1639174	2021	Bioassay
compound 3	10.1080/14786419.2019.1639174	2021	Bioassay
compound 4	10.1080/14786419.2019.1639174	2021	Bioassay
compound 5	10.1080/14786419.2019.1639174	2021	Bioassay
compound 6	10.1080/14786419.2019.1639174	2021	Bioassay
6,7-dimethoxy-3-phenylchromen-4-one	10.1128/AEM.03157-20	2021	Bioassay
Maipomycin A	10.3389/fmicb.2020.598024	2021	Bioassay
compound 1	10.3390/molecules26247556	2021	Bioassay
baoshanmycin	10.1002/cbdv.202200064	2022	Bioassay
3-(1,3-dihydroxybutyl)-4-methylfuran-2(H)-one	10.1002/cbdv.202200064	2022	Bioassay
Kenalactam A	10.1007/s00284-022-02954-x	2022	Bioassay
Kenalactam B	10.1007/s00284-022-02954-x	2022	Bioassay
Kenalactam C	10.1007/s00284-022-02954-x	2022	Bioassay
Kenalactam D	10.1007/s00284-022-02954-x	2022	Bioassay
Kenalactam E	10.1007/s00284-022-02954-x	2022	Bioassay
1,2-Benzenedicarboxylic Acid	10.1007/s12010-021-03766-8	2022	Bioassay
not named 1	10.1016/j.fitote.2021.105107	2022	Bioassay
not named 2	10.1016/j.fitote.2021.105107	2022	Bioassay
not named 3	10.1016/j.fitote.2021.105107	2022	Bioassay
Streptophenvaleramide A	10.1016/j.phytochem.2022.113292	2022	Bioassay
Streptophenylpropionic acid A	10.1016/j.phytochem.2022.113292	2022	Bioassay
Galbonolide H	10.1016/j.phytochem.2022.113292	2022	Bioassay
Galbonolide I	10.1016/j.phytochem.2022.113292	2022	Bioassay
seco-geldanamycin A	10.1016/j.phytochem.2022.113292	2022	Bioassay
Streptorapamycin A	10.1016/j.phytochem.2022.113292	2022	Bioassay
Niphimycin C	10.1021/acs.jafc.2c02810	2022	Bioassay
Bitetracenomycin A	10.1021/acs.jnatprod.1c00735	2022	Bioassay
Bitetracenomycin B	10.1021/acs.jnatprod.1c00735	2022	Bioassay
Kongjuemycin A	10.1021/acs.orglett.2c01089	2022	Bioassay
Kongjuemycin B1	10.1021/acs.orglett.2c01089	2022	Bioassay
Kongjuemycin B2	10.1021/acs.orglett.2c01089	2022	Bioassay
Kongjuemycin B3	10.1021/acs.orglett.2c01089	2022	Bioassay
Phthoramycin B	10.1038/s41429-022-00563-1	2022	Bioassay
Phthoramycin C	10.1038/s41429-022-00563-1	2022	Bioassay
Dynaplanin A	10.1128/mbio.00393-22	2022	Bioassay
Dynaplanin B	10.1128/mbio.00393-22	2022	Bioassay
Dynaplanin C	10.1128/mbio.00393-22	2022	Bioassay
Dynaplanin D	10.1128/mbio.00393-22	2022	Bioassay
Dynaplanin E	10.1128/mbio.00393-22	2022	Bioassay
Grincamycin N	10.1186/s12866-022-02501-5	2022	Bioassay
Carboxamycin B	10.3389/fchem.2022.948795	2022	Bioassay
Peperodione	10.3389/fmicb.2022.831174	2022	Bioassay
Peperophthalene	10.3389/fmicb.2022.831174	2022	Bioassay
Streptophenylpropanamide A	10.3390/antibiotics11111455	2022	Bioassay
Hygrocin K	10.3390/antibiotics11111455	2022	Bioassay
Hygrocin L	10.3390/antibiotics11111455	2022	Bioassay
Hygrocin M	10.3390/antibiotics11111455	2022	Bioassay
Hygrocin N	10.3390/antibiotics11111455	2022	Bioassay
Hygrocin O	10.3390/antibiotics11111455	2022	Bioassay
Hygrocin P	10.3390/antibiotics11111455	2022	Bioassay
Hygrocin Q	10.3390/antibiotics11111455	2022	Bioassay
Hygrocin R	10.3390/antibiotics11111455	2022	Bioassay
Hygrocin S	10.3390/antibiotics11111455	2022	Bioassay
Hygrocin T	10.3390/antibiotics11111455	2022	Bioassay
Hygrocin U	10.3390/antibiotics11111455	2022	Bioassay
Bacillimide	10.3390/md20020138	2022	Bioassay
2,2- dioxidothiolutin	10.3390/md20030214	2022	Bioassay
Thiolopyrrolone A	10.3390/md20030214	2022	Bioassay
Herbidosporadalins A	10.3390/molecules27061887	2022	Bioassay
Herbidosporadalins B	10.3390/molecules27061887	2022	Bioassay
Herbidosporadalins C	10.3390/molecules27061887	2022	Bioassay
Herbidosporadalins D	10.3390/molecules27061887	2022	Bioassay
Herbidosporadalins E	10.3390/molecules27061887	2022	Bioassay
Kribbellichelin A	10.3390/molecules27196355	2022	Bioassay
Kribbellichelin B	10.3390/molecules27196355	2022	Bioassay
Acrocarpunicain A	10.3390/molecules27227982	2022	Bioassay
Acrocarpunicain B	10.3390/molecules27227982	2022	Bioassay
Acrocarpunicain C	10.3390/molecules27227982	2022	Bioassay
Acrocarpunicain D	10.3390/molecules27227982	2022	Bioassay
Acrocarpunicain E	10.3390/molecules27227982	2022	Bioassay
Antimycin Q	10.1002/cbdv.202300715	2023	Bioassay
Bulactonmycin A (9)	10.1016/j.jep.2023.116457	2023	Bioassay
Vineotonlactone A (7)	10.1016/j.jep.2023.116457	2023	Bioassay
Amicemycinone (3)	10.1016/j.jep.2023.116457	2023	Bioassay
Danthronmycin (6)	10.1016/j.jep.2023.116457	2023	Bioassay
Vineotonlactone B (8)	10.1016/j.jep.2023.116457	2023	Bioassay
Bulactonmycin B (10)	10.1016/j.jep.2023.116457	2023	Bioassay
α-L-rhamnosyl-actiphenol	10.1021/acs.jnatprod.2c00951	2023	Bioassay
compound 2	10.1038/s41429-022-00581-z	2023	Bioassay
compound 4	10.1038/s41429-022-00581-z	2023	Bioassay
compound 5	10.1038/s41429-022-00581-z	2023	Bioassay
compound 6	10.1038/s41429-022-00581-z	2023	Bioassay
4-hydroxycinnamide	10.1186/s12866-023-02770-8	2023	Bioassay
Acrocarposporins A	10.3390/antibiotics12010095	2023	Bioassay
Acrocarposporins B	10.3390/antibiotics12010095	2023	Bioassay
Acrocarposporins C	10.3390/antibiotics12010095	2023	Bioassay
Acrocarposporins D	10.3390/antibiotics12010095	2023	Bioassay
Acrocarposporins E	10.3390/antibiotics12010095	2023	Bioassay
Nicardifuran D	10.3390/ijms24032822	2023	Bioassay
Nicardifuran E	10.3390/ijms24032822	2023	Bioassay
Tiuslactone A	10.3390/microorganisms11030616	2023	Bioassay
Tiuslactone B	10.3390/microorganisms11030616	2023	Bioassay
Tiuslactone C	10.3390/microorganisms11030616	2023	Bioassay
Tiuslactone D	10.3390/microorganisms11030616	2023	Bioassay
Tiuslactone E	10.3390/microorganisms11030616	2023	Bioassay
Tiusester	10.3390/microorganisms11030616	2023	Bioassay
Tetronomycin A	10.3390/molecules28155832	2023	Bioassay
compound 1	10.1016/j.resmic.2021.103812	2021	Genomic
compound 3	10.1016/j.resmic.2021.103812	2021	Genomic
compound 5	10.1016/j.resmic.2021.103812	2021	Genomic
Saccharothrixin D	10.1021/acs.jnatprod.1c00617	2021	Genomic
Saccharothrixin E	10.1021/acs.jnatprod.1c00617	2021	Genomic
Saccharothrixin F	10.1021/acs.jnatprod.1c00617	2021	Genomic
Saccharothrixin G	10.1021/acs.jnatprod.1c00617	2021	Genomic
Saccharothrixin H	10.1021/acs.jnatprod.1c00617	2021	Genomic
Saccharothrixin I	10.1021/acs.jnatprod.1c00617	2021	Genomic
Saccharothrixin J	10.1021/acs.jnatprod.1c00617	2021	Genomic
Saccharothrixin K	10.1021/acs.jnatprod.1c00617	2021	Genomic
Saccharothrixin L	10.1021/acs.jnatprod.1c00617	2021	Genomic
Saccharothrixin M	10.1021/acs.jnatprod.1c00617	2021	Genomic
Amycoletate A	10.3389/fmicb.2021.743116	2021	Genomic
Amycoletate B	10.3389/fmicb.2021.743116	2021	Genomic
Koyanamide A	10.3390/md19080440	2021	Genomic
Griseusin-Derived N-Acetyl Cysteine Adducts 1	10.3390/molecules26216580	2021	Genomic
Griseusin-Derived N-Acetyl Cysteine Adducts 2	10.3390/molecules26216580	2021	Genomic
1-deoxy-8a-hydroxypentalenic acid	10.3390/molecules26237377	2021	Genomic
1-deoxy-9b-hydroxy-11-oxopentalenic acid	10.3390/molecules26237377	2021	Genomic
8-demethoxysteffimycin B	10.1007/s00253-022-11915-0	2022	Genomic
8-demethoxy-10-deoxysteffimycin B	10.1007/s00253-022-11915-0	2022	Genomic
7-deoxy-8-demethoxysteffimycinone	10.1007/s00253-022-11915-0	2022	Genomic
7-deoxy-10-deoxysteffimycinone	10.1007/s00253-022-11915-0	2022	Genomic
Polyoxyperuin A seco acid	10.1021/acs.jnatprod.1c01018	2022	Genomic
Polyoxyperuin A	10.1021/acs.jnatprod.1c01018	2022	Genomic
poly-L-β-Lys	10.1021/acschembio.1c00832	2022	Genomic
Solabiomycin A	10.1021/acschembio.2c00601	2022	Genomic
Solabiomycin B	10.1021/acschembio.2c00601	2022	Genomic
YM3163-A	10.1093/bbb/zbab206	2022	Genomic
YM3163-B	10.1093/bbb/zbab206	2022	Genomic
Marinolactam A	10.1093/nar/gkac181	2022	Genomic
Colibrimycin A1	10.1128/AEM.01839-21	2022	Genomic
Colibrimycin A2	10.1128/AEM.01839-21	2022	Genomic
Colibrimycin A3	10.1128/AEM.01839-21	2022	Genomic
Colibrimycin A4	10.1128/AEM.01839-21	2022	Genomic
Colibrimycin A5	10.1128/AEM.01839-21	2022	Genomic
Colibrimycin B1	10.1128/AEM.01839-21	2022	Genomic
Colibrimycin B2	10.1128/AEM.01839-21	2022	Genomic
Colibrimycin C1	10.1128/AEM.01839-21	2022	Genomic
Colibrimycin C2	10.1128/AEM.01839-21	2022	Genomic
Colibrimycin C3	10.1128/AEM.01839-21	2022	Genomic
Colibrimycin C4	10.1128/AEM.01839-21	2022	Genomic
Colibrimycin C5	10.1128/AEM.01839-21	2022	Genomic
Colibrimycin C6	10.1128/AEM.01839-21	2022	Genomic
TimmycinA	10.1016/j.synbio.2023.07.003	2023	Genomic
TimmycinB	10.1016/j.synbio.2023.07.003	2023	Genomic
Acidonemycin A	10.1021/acs.jnatprod.3c00502	2023	Genomic
Acidonemycin B	10.1021/acs.jnatprod.3c00502	2023	Genomic
Acidonemycin C	10.1021/acs.jnatprod.3c00502	2023	Genomic
Lunaemycin A	10.3390/ijms24021114	2023	Genomic
Lunaemycin B1	10.3390/ijms24021114	2023	Genomic
Lunaemycin B2	10.3390/ijms24021114	2023	Genomic
Lunaemycin C1	10.3390/ijms24021114	2023	Genomic
Lunaemycin C2	10.3390/ijms24021114	2023	Genomic
Lunaemycin D	10.3390/ijms24021114	2023	Genomic
Lunaemycin E1	10.3390/ijms24021114	2023	Genomic
Lunaemycin E2	10.3390/ijms24021114	2023	Genomic
Lunaemycin F	10.3390/ijms24021114	2023	Genomic
Lunaemycin G	10.3390/ijms24021114	2023	Genomic
Lunaemycin H	10.3390/ijms24021114	2023	Genomic
Lunaemycin I	10.3390/ijms24021114	2023	Genomic
Lunaemycin J1	10.3390/ijms24021114	2023	Genomic
Lunaemycin J2	10.3390/ijms24021114	2023	Genomic
Microechmycin A	10.3390/molecules28020821	2023	Genomic
Microechmycin B	10.3390/molecules28020821	2023	Genomic
Microechmycin C	10.3390/molecules28020821	2023	Genomic
Microechmycin D	10.3390/molecules28020821	2023	Genomic
Microechmycin E	10.3390/molecules28020821	2023	Genomic
Himalayaquinone A	10.1021/acs.jnatprod.1c00192	2021	Metabolomic
Himalayaquinone B	10.1021/acs.jnatprod.1c00192	2021	Metabolomic
Himalayaquinone C	10.1021/acs.jnatprod.1c00192	2021	Metabolomic
Himalayaquinone D	10.1021/acs.jnatprod.1c00192	2021	Metabolomic
Himalayaquinone E	10.1021/acs.jnatprod.1c00192	2021	Metabolomic
Himalayaquinone F	10.1021/acs.jnatprod.1c00192	2021	Metabolomic
Himalayaquinone G	10.1021/acs.jnatprod.1c00192	2021	Metabolomic
Miaosporone E	10.1021/acs.jnatprod.1c00232	2021	Metabolomic
Miaosporone G	10.1021/acs.jnatprod.1c00232	2021	Metabolomic
Miaosporone A	10.1021/acs.jnatprod.1c00232	2021	Metabolomic
Miaosporone B	10.1021/acs.jnatprod.1c00232	2021	Metabolomic
Miaosporone C	10.1021/acs.jnatprod.1c00232	2021	Metabolomic
Miaosporone D	10.1021/acs.jnatprod.1c00232	2021	Metabolomic
Miaosporone F	10.1021/acs.jnatprod.1c00232	2021	Metabolomic
Miaosporone H	10.1021/acs.jnatprod.1c00232	2021	Metabolomic
Akazaoxime	10.1021/acs.joc.1c00358	2021	Metabolomic
2-hydroxy-frigocyclinone	10.3390/md20010034	2021	Metabolomic
Kendomycin E	10.3390/molecules26226834	2021	Metabolomic
peptidendrocin C	10.1002/ps.7204	2022	Metabolomic
Naphthacemycin D1	10.1016/j.bbrc.2022.06.095	2022	Metabolomic
Naphthacemycin D2	10.1016/j.bbrc.2022.06.095	2022	Metabolomic
Tetrodecadazinone	10.1016/j.bioorg.2021.105573	2022	Metabolomic
Gwanakoside A	10.1021/acs.jnatprod.1c00703	2022	Metabolomic
Gwanakoside B	10.1021/acs.jnatprod.1c00703	2022	Metabolomic
Sarubicinol A	10.1021/acs.jnatprod.1c00820	2022	Metabolomic
Sarubicinol B	10.1021/acs.jnatprod.1c00820	2022	Metabolomic
Sarubicinol C	10.1021/acs.jnatprod.1c00820	2022	Metabolomic
Sarubicin B1	10.1021/acs.jnatprod.1c00820	2022	Metabolomic
Sarubicin B2	10.1021/acs.jnatprod.1c00820	2022	Metabolomic
Pacificamide	10.1021/acs.jnatprod.1c01117	2022	Metabolomic
Nexphenazine A	10.1021/acs.jnatprod.2c00067	2022	Metabolomic
Phytohabitol A	10.1021/acs.jnatprod.2c00137	2022	Metabolomic
Phytohabitol B	10.1021/acs.jnatprod.2c00137	2022	Metabolomic
Phytohabitol C	10.1021/acs.jnatprod.2c00137	2022	Metabolomic
Dihydromaniwamycin E	10.1021/acs.jnatprod.2c00550	2022	Metabolomic
Ulleungdolin	10.1021/acs.jnatprod.2c00682	2022	Metabolomic
Yeppoonic acid A	10.1038/s41429-021-00493-4	2022	Metabolomic
Yeppoonic acid B	10.1038/s41429-021-00493-4	2022	Metabolomic
Yeppoonic acid C	10.1038/s41429-021-00493-4	2022	Metabolomic
Yeppoonic acid D	10.1038/s41429-021-00493-4	2022	Metabolomic
Noaoxazole	10.1038/s41429-022-00551-5	2022	Metabolomic
Phitsanoside A	10.1038/s41429-022-00554-2	2022	Metabolomic
Phitsanoside B	10.1038/s41429-022-00554-2	2022	Metabolomic
RD4123A	10.1038/s41429-022-00558-y	2022	Metabolomic
RD4123B	10.1038/s41429-022-00558-y	2022	Metabolomic
RD4123C	10.1038/s41429-022-00558-y	2022	Metabolomic
RD4123D	10.1038/s41429-022-00558-y	2022	Metabolomic
RD4123E	10.1038/s41429-022-00558-y	2022	Metabolomic
Kintamdin	10.1038/s41467-022-32774-3	2022	Metabolomic
Actinomycin L1	10.1038/s41598-022-06736-0	2022	Metabolomic
Actinomycin L2	10.1038/s41598-022-06736-0	2022	Metabolomic
Fluvirucin B7	10.1039/d2ra01701f	2022	Metabolomic
Fluvirucin B8	10.1039/d2ra01701f	2022	Metabolomic
Fluvirucin B9	10.1039/d2ra01701f	2022	Metabolomic
Fluvirucin B10	10.1039/d2ra01701f	2022	Metabolomic
Cystargamides C	10.3389/fmicb.2022.904954	2022	Metabolomic
Cystargamides D	10.3389/fmicb.2022.904954	2022	Metabolomic
Ligiamycins A	10.3390/md20020083	2022	Metabolomic
Ligiamycins B	10.3390/md20020083	2022	Metabolomic
Amycolachromone A	10.3390/md20030162	2022	Metabolomic
Amycolachromone B	10.3390/md20030162	2022	Metabolomic
Amycolachromone C	10.3390/md20030162	2022	Metabolomic
Amycolachromone D	10.3390/md20030162	2022	Metabolomic
Amycolachromone E	10.3390/md20030162	2022	Metabolomic
Amycolachromone F	10.3390/md20030162	2022	Metabolomic
Glaciapyrrole D	10.3390/md20050281	2022	Metabolomic
Glaciapyrrole E	10.3390/md20050281	2022	Metabolomic
Minipyrone	10.3390/md20060393	2022	Metabolomic
Epoxinnamide	10.3390/md20070455	2022	Metabolomic
Thiocarbazomycin A	10.3390/md20080537	2022	Metabolomic
Thiocarbazomycin B	10.3390/md20080537	2022	Metabolomic
Chlocarbazomycin E	10.3390/md20080537	2022	Metabolomic
Brocarbazomycin A	10.3390/md20080537	2022	Metabolomic
Actinoflavoside A	10.3390/md20090565	2022	Metabolomic
Actinoflavoside B	10.3390/md20090565	2022	Metabolomic
Actinoflavoside C	10.3390/md20090565	2022	Metabolomic
Mintaimycin A1	10.3390/molecules27041150	2022	Metabolomic
Mintaimycin B	10.3390/molecules27041150	2022	Metabolomic
Mintaimycin A2	10.3390/molecules27041150	2022	Metabolomic
Mintaimycin A3	10.3390/molecules27041150	2022	Metabolomic
Persicamidine A	10.1002/anie.202214595	2023	Metabolomic
Persicamidine B	10.1002/anie.202214595	2023	Metabolomic
Persicamidine C	10.1002/anie.202214595	2023	Metabolomic
Persicamidine D	10.1002/anie.202214595	2023	Metabolomic
Persicamidine E	10.1002/anie.202214595	2023	Metabolomic
Olimycin E	10.1002/cbdv.202300689	2023	Metabolomic
Olimycin F	10.1002/cbdv.202300689	2023	Metabolomic
Olimycin G	10.1002/cbdv.202300689	2023	Metabolomic
Olimycin H	10.1002/cbdv.202300689	2023	Metabolomic
Streptothiomycin A (1)	10.1002/cbdv.202301017	2023	Metabolomic
Streptothiomycin B (2)	10.1002/cbdv.202301017	2023	Metabolomic
Streptothiomycin C (3)	10.1002/cbdv.202301017	2023	Metabolomic
Streptothiomycin D (4)	10.1002/cbdv.202301017	2023	Metabolomic
Streptothiomycin E (5)	10.1002/cbdv.202301017	2023	Metabolomic
Cyclopentenone (6)	10.1002/cbdv.202301017	2023	Metabolomic
Cyclopentenone (7)	10.1002/cbdv.202301017	2023	Metabolomic
α-pyrone (8)	10.1002/cbdv.202301017	2023	Metabolomic
Wailupemycin Q (20)	10.1002/cbdv.202301017	2023	Metabolomic
Dermazolium A	10.1007/s12272-022-01424-z	2023	Metabolomic
Odoripenoid A	10.1016/j.phytochem.2023.113779	2023	Metabolomic
Odoripenoid B	10.1016/j.phytochem.2023.113779	2023	Metabolomic
Odoripenoid C	10.1016/j.phytochem.2023.113779	2023	Metabolomic
Odoripenoid D	10.1016/j.phytochem.2023.113779	2023	Metabolomic
Obscurolide-type metabolite 1	10.1021/acs.jnatprod.3c00193	2023	Metabolomic
Obscurolide-type metabolite 2	10.1021/acs.jnatprod.3c00193	2023	Metabolomic
Obscurolide-type metabolite 3	10.1021/acs.jnatprod.3c00193	2023	Metabolomic
Tripmycin A	10.1021/acs.jnatprod.3c00199	2023	Metabolomic
10-O-Demethyl-deacetylravidomycin	10.1021/acs.jnatprod.3c00381	2023	Metabolomic
Ravidomycin M	10.1021/acs.jnatprod.3c00381	2023	Metabolomic
Deacetylravidomycin HE	10.1021/acs.jnatprod.3c00381	2023	Metabolomic
N-Demethyl-N-methoxycarbonyl-deacetylravidomycin	10.1021/acs.jnatprod.3c00381	2023	Metabolomic
N,N-Didemethyl-N-methoxycarbonyl-deacetylravidomycin	10.1021/acs.jnatprod.3c00381	2023	Metabolomic
N,N-didemethyl-N-acetyl-deacetylravidomycin	10.1021/acs.jnatprod.3c00381	2023	Metabolomic
Terpenomycin	10.1021/acschembio.3c00311	2023	Metabolomic
Ecteinamine A	10.1021/jacs.2c06410	2023	Metabolomic
Ecteinamine B	10.1021/jacs.2c06410	2023	Metabolomic
Ecteinamine C	10.1021/jacs.2c06410	2023	Metabolomic
Ecteinamine D	10.1021/jacs.2c06410	2023	Metabolomic
Ecteinamine E	10.1021/jacs.2c06410	2023	Metabolomic
Ecteinamine F	10.1021/jacs.2c06410	2023	Metabolomic
Ecteinamine G	10.1021/jacs.2c06410	2023	Metabolomic
Ecteinamine H	10.1021/jacs.2c06410	2023	Metabolomic
Ecteinamine I	10.1021/jacs.2c06410	2023	Metabolomic
Ecteinamine J	10.1021/jacs.2c06410	2023	Metabolomic
Ecteinamine K	10.1021/jacs.2c06410	2023	Metabolomic
Ecteinamine L	10.1021/jacs.2c06410	2023	Metabolomic
Ecteinamine M	10.1021/jacs.2c06410	2023	Metabolomic
Ecteinamine N	10.1021/jacs.2c06410	2023	Metabolomic
Ecteinamine O	10.1021/jacs.2c06410	2023	Metabolomic
Ecteinamine P	10.1021/jacs.2c06410	2023	Metabolomic
Ecteinamine Q	10.1021/jacs.2c06410	2023	Metabolomic
1-(6-methylsalicyloyl)glycerol	10.1038/s41429-022-00578-8	2023	Metabolomic
Habipyranoquinone A	10.1038/s41429-023-00605-2	2023	Metabolomic
Habipyranoquinone B	10.1038/s41429-023-00605-2	2023	Metabolomic
Habipyranoquinone C	10.1038/s41429-023-00605-2	2023	Metabolomic
(R)-N-methyl-3-hydroxy-5,6-dimethoxyoxindole	10.1038/s41429-023-00605-2	2023	Metabolomic
Biseoate	10.1038/s41429-023-00644-9	2023	Metabolomic
Iseoic acid A	10.1038/s41429-023-00644-9	2023	Metabolomic
Iseoic acid B	10.1038/s41429-023-00644-9	2023	Metabolomic
Actinomycin S	10.1039/d2ob02247h	2023	Metabolomic
Neo-actinomycin C	10.1039/d2ob02247h	2023	Metabolomic
Neo-actinomycin D	10.1039/d2ob02247h	2023	Metabolomic
4,7-dimethylbenzo(d)oxazole-1-carboxylate	10.1039/d2ob02247h	2023	Metabolomic
Resorculin A	10.1039/d2ob02332f	2023	Metabolomic
Resorculin B	10.1039/d2ob02332f	2023	Metabolomic
Nocarpyrroline A	10.3390/md21020127	2023	Metabolomic
compound 19	10.3390/md21100526	2023	Metabolomic
compound 20	10.3390/md21100526	2023	Metabolomic
compound 21	10.3390/md21100526	2023	Metabolomic
compound 22	10.3390/md21100526	2023	Metabolomic
compound 23	10.3390/md21100526	2023	Metabolomic
Virantmycin D	10.3390/molecules28020878	2023	Metabolomic
Virantmycin E	10.3390/molecules28020878	2023	Metabolomic
Virantmycin F	10.3390/molecules28020878	2023	Metabolomic
Janibatide A	10.3390/molecules28052133	2023	Metabolomic
Serpentemycin E	10.3390/molecules28062579	2023	Metabolomic
Serpentemycin A	10.3390/molecules28062579	2023	Metabolomic
Serpentemycin B	10.3390/molecules28062579	2023	Metabolomic
Serpentemycin C	10.3390/molecules28062579	2023	Metabolomic
Serpentemycin D	10.3390/molecules28062579	2023	Metabolomic
Serpentemycin F	10.3390/molecules28062579	2023	Metabolomic
Tsukubarubicin	10.1007/s00253-021-11344-5	2021	Mixed
Saccharopiscinol A	10.3390/molecules26164909	2021	Mixed
Saccharopiscinol B	10.3390/molecules26164909	2021	Mixed
Saccharopiscinol C	10.3390/molecules26164909	2021	Mixed
Amycolataiwanensin A	10.3390/molecules26195765	2021	Mixed
Amycolataiwanensin B	10.3390/molecules26195765	2021	Mixed
Amycolataiwanensin C	10.3390/molecules26195765	2021	Mixed
Amycolataiwanensin F	10.3390/molecules26195765	2021	Mixed
Amycolataiwanensin G	10.3390/molecules26195765	2021	Mixed
Amycolataiwanensin I	10.3390/molecules26195765	2021	Mixed
Amycolataiwanensin D	10.3390/molecules26195765	2021	Mixed
Amycolataiwanensin E	10.3390/molecules26195765	2021	Mixed
Amycolataiwanensin H	10.3390/molecules26195765	2021	Mixed
(2E,4E)-2,4-dimethyl-2,4-octadienoic acid	10.3762/bjoc.17.203	2021	Mixed
(2E,4E)-2,4,7-trimethyl-2,4-octadienoic acid	10.3762/bjoc.17.203	2021	Mixed
(R)-(−)-phialomustin B	10.3762/bjoc.17.203	2021	Mixed
(2E,4E)-7-hydroxy-2,4-dimethyl-2,4-octadienoic acid	10.3762/bjoc.17.203	2021	Mixed
(2E,4E)-7-hydroxy-2,4,7-trimethyl-2,4-octadienoic acid	10.3762/bjoc.17.203	2021	Mixed
Streptooctatin A	10.1016/j.bmcl.2021.128504	2022	Mixed
Streptooctatin B	10.1016/j.bmcl.2021.128504	2022	Mixed
Allopeptimicin A1	10.1039/d2ra02094g	2022	Mixed
Allopeptimicin A2	10.1039/d2ra02094g	2022	Mixed
Allopeptimicin A3	10.1039/d2ra02094g	2022	Mixed
Allopeptimicin A4	10.1039/d2ra02094g	2022	Mixed
Allopeptimicin B1	10.1039/d2ra02094g	2022	Mixed
Allopeptimicin B2	10.1039/d2ra02094g	2022	Mixed
Allopeptimicin B3	10.1039/d2ra02094g	2022	Mixed
Allopeptimicin B4	10.1039/d2ra02094g	2022	Mixed
3-hydroxy-flavacol	10.3390/microorganisms10122335	2022	Mixed
l-isoleucine, N-allyloxycarbonyl-, and dodecyl ester	10.1007/s11356-022-23565-w	2023	Mixed
Nocarlipoamide	10.1016/j.chroma.2023.464343	2023	Mixed
Nocarjamide congener _ compound 2	10.1016/j.chroma.2023.464343	2023	Mixed
Nocarjamide congener _ compound 3	10.1016/j.chroma.2023.464343	2023	Mixed
Nocarjamide congener _ compound 4	10.1016/j.chroma.2023.464343	2023	Mixed
Nocarjamide congener _ compound 5	10.1016/j.chroma.2023.464343	2023	Mixed
Nocarjamide congener _ compound 6	10.1016/j.chroma.2023.464343	2023	Mixed
Lenziamide B1	10.1021/acs.jnatprod.3c00310	2023	Mixed
Lenziamide D1	10.1021/acs.jnatprod.3c00310	2023	Mixed
Crossiellidine A	10.1021/acs.orglett.3c01088	2023	Mixed
Crossiellidine B	10.1021/acs.orglett.3c01088	2023	Mixed
Crossiellidine C	10.1021/acs.orglett.3c01088	2023	Mixed
Crossiellidine D	10.1021/acs.orglett.3c01088	2023	Mixed
Crossiellidine E	10.1021/acs.orglett.3c01088	2023	Mixed
Crossiellidine F	10.1021/acs.orglett.3c01088	2023	Mixed
Megalochelin	10.1021/acschembio.2c00958	2023	Mixed
Megalochelin-linear form	10.1021/acschembio.2c00958	2023	Mixed
Concolactam	10.1021/jacs.2c11527	2023	Mixed
Muanlactam	10.1021/jacs.2c11527	2023	Mixed
not named	10.1128/spectrum.03661-22	2023	Mixed
Butanolide 1	10.3390/md21090465	2023	Mixed
Butanolide 4	10.3390/md21090465	2023	Mixed
Butanolide 5	10.3390/md21090465	2023	Mixed
Butanolide 6	10.3390/md21090465	2023	Mixed

## Sheet: Legend
Compound name	Metabolite name as identified in NP Atlas (or in the original paper for metabolites not included in NP Atlas)
Reference DOI	DOI of the first paper citing the metabolite
Year	Year of publication of the first report on the metabolite
npaid	Unique identification code associated to the metabolite in NP Atlas
Originality	Identification as Original or Variant (see main text) - only for NP Atlas entries
Approach	Identification of the discovery approach as defined in the main text
NP Classifier Pathway Results	Metabolite biosynthetic pathway as reported in NP Classifier (only for NP Atlas entries
BGC selection strategy	Criteria for selection in genomic approach (see main text for details), N/A: not applicable
